# Supplementary material for: Long-term historical and projected herbivore population dynamics in Ngorongoro crater, Tanzania
Source: PLoS One. 2020 Mar 10;15(3):e0212530. doi: 10.1371/journal.pone.0212530 (PMC7064247; doi:10.1371/journal.pone.0212530)
Supplement: S4 Data — The logarithm of the forecasted population size is also provided for each of the five most abundant herbivore species for 2013 to 2100 under each of the three climate change scenarios: RCP 2.6, RCP 4.5 and RCP 8.5. (XLSX) [file pone.0212530.s004.xlsx]

## Sheet: #LN04150
	Scenario	Year	Season	Wildebeest	Forecasts for	Lower Confidence	Upper Confidence	Zebra	Forecasts for	Lower Confidence	Upper Confidence	Buffalo	Forecasts for	Lower Confidence	Upper Confidence	Thomson's gazelle	Forecasts for	Lower Confidence	Upper Confidence	Grant's gazelle	Forecasts for	Lower Confidence	Upper Confidence
					Wildebeest	limit for	limit for		Zebra	limit for	limit for		Buffalo	limit for	limit for		Thomson's gazelle	limit for	limit for		Grant's gazelle	limit for	limit for
						Wildebeest	Wildebeest			Zebra	Zebra			Buffalo	Buffalo			Thomson's gazelle	Thomson's gazelle			Grant's gazelle	Grant's gazelle
	Historical	1964	Dry	9.90544	.	.	.	8.7126	.	.	.	0	.	.	.	8.55109	.	.	.	7.44882	.	.	.
	Historical	1965	Dry	9.84982	.	.	.	8.61179	.	.	.	0.32792	.	.	.	8.45813	.	.	.	7.44659	.	.	.
	Historical	1966	Dry	9.81764	.	.	.	8.58975	.	.	.	0.41	.	.	.	8.46526	.	.	.	7.36633	.	.	.
	Historical	1967	Dry	9.78552	.	.	.	8.56778	.	.	.	0.50796	.	.	.	8.36651	.	.	.	7.3687	.	.	.
	Historical	1968	Dry	9.75347	.	.	.	8.54587	.	.	.	0.69315	.	.	.	8.35937	.	.	.	7.22766	.	.	.
	Historical	1969	Dry	9.70174	9.7535	8.5995	10.9074	8.48508	8.54587	8.17653	8.91522	0	0.69315	-0.24675	1.633	8.24052	8.35937	7.86191	8.85682	7.44044	7.22766	6.54231	7.91301
	Historical	1970	Dry	9.71008	9.8277	9.24602	10.4094	8.51592	8.37287	8.03602	8.70971	1.17837	0.53666	-0.3581	1.4314	8.23647	8.42265	7.92531	8.92	7.30378	7.43696	6.97913	7.8948
	Historical	1971	Dry	9.72902	9.5933	9.13746	10.0491	8.61686	8.47912	8.14869	8.80956	0	0.69431	-0.18265	1.5713	8.55005	8.2961	7.80076	8.79144	7.30854	7.17952	6.76293	7.59612
	Historical	1972	Dry	9.66491	9.5065	9.05757	9.9554	8.66268	8.43136	8.11462	8.7481	2.56495	2.64693	1.80079	3.4931	8.0762	8.25466	7.78983	8.71949	7.00851	6.74695	6.41344	7.08046
	Historical	1973	Dry	9.63479	9.5395	9.09072	9.9882	8.24892	8.35997	8.04417	8.67577	5.1985	4.31912	3.50016	5.1381	7.83241	8.19713	7.7487	8.64557	7.37526	7.46741	7.1463	7.78851
	Historical	1974	Dry	9.50054	9.6554	9.20755	10.1032	8.46989	8.37706	8.06413	8.68999	4.39445	5.05498	4.25399	5.856	8.32724	8.22488	7.78792	8.66185	7.49443	7.33545	7.01978	7.65112
	Historical	1975	Dry	9.71974	9.3609	8.91385	9.8079	8.50755	8.44514	8.13263	8.75765	5.79909	5.65693	4.86702	6.4468	8.43055	8.34492	7.90835	8.7815	7.61972	7.41124	7.09996	7.72253
	Historical	1976	Dry	9.81143	9.4629	9.01655	9.9093	8.32845	8.30336	7.99211	8.61462	6.10479	5.6903	4.9073	6.4733	8.1374	8.07305	7.63705	8.50904	7.28001	7.42491	7.11692	7.7329
	Historical	1977	Dry	9.60871	9.3081	8.86207	9.7541	8.06338	8.32359	8.01258	8.63461	5.84788	6.24059	5.46206	7.0191	7.93791	7.84123	7.4082	8.27426	7.32284	7.24672	6.9413	7.55214
	Historical	1978	Dry	9.58436	9.3093	8.86353	9.755	8.25796	8.01766	7.70735	8.32797	6.06735	6.34759	5.57207	7.1231	8.0913	7.86666	7.4357	8.29761	7.22438	7.21518	6.91188	7.51849
	Historical	1979	Dry	9.54047	9.4644	9.01884	9.91	8.26246	8.13094	7.82078	8.4411	6.23043	6.6178	5.84438	7.3912	7.91578	7.85325	7.42248	8.28401	7.2544	7.16945	6.86794	7.47096
	Historical	1980	Dry	9.4966	9.5788	9.13333	10.0243	8.26695	8.32554	8.01584	8.63524	6.39356	6.66892	5.89701	7.4408	7.9256	7.77535	7.34476	8.20594	7.26877	7.39214	7.09217	7.69211
	Historical	1981	Dry	9.45274	9.3332	8.88784	9.7786	8.27145	8.21435	7.90475	8.52395	6.55673	6.42468	5.65388	7.1955	7.87104	7.82075	7.39163	8.24987	7.16063	7.19331	6.89468	7.49195
	Historical	1982	Dry	9.40892	9.5262	9.08088	9.9716	8.27594	8.30497	7.99569	8.61425	6.71995	6.28852	5.51854	7.0585	7.6493	7.73041	7.30195	8.15888	7.08567	6.9952	6.69773	7.29267
	Historical	1983	Dry	9.36512	9.3571	8.9118	9.8025	8.28045	8.29521	7.98601	8.60441	6.88319	6.8065	6.03715	7.5759	7.86669	7.72952	7.30118	8.15786	7.16974	7.25232	6.9559	7.54875
	Historical	1984	Dry	9.32136	9.4057	8.96038	9.851	8.28496	8.38851	8.07954	8.69748	7.04646	7.15432	6.38545	7.9232	7.58696	7.59681	7.16861	8.02501	7.04458	7.10948	6.81398	7.40498
	Historical	1985	Dry	9.27764	9.3661	8.92078	9.8114	8.28949	8.41822	8.10931	8.72713	7.20976	7.55534	6.78682	8.3238	7.64494	7.58082	7.15351	8.00814	7.0327	7.02043	6.72576	7.3151
	Historical	1986	Dry	9.37991	9.3722	8.92687	9.8174	8.36591	8.39323	8.08451	8.70196	7.28345	7.50924	6.741	8.2775	7.33943	7.20614	6.77906	7.63322	7.01181	6.91925	6.62533	7.21317
	Historical	1987	Dry	8.9114	8.8739	8.42865	9.3192	8.37402	8.27383	7.96515	8.58251	7.95718	7.66068	6.89265	8.4287	7.54771	7.28782	6.86083	7.71482	7.03527	6.89553	6.60229	7.18878
	Historical	1988	Dry	9.04798	8.9006	8.45529	9.3458	8.30416	8.17887	7.87033	8.48741	7.45356	7.32418	6.5563	8.0921	7.03384	7.20377	6.77693	7.63061	6.94466	6.93319	6.64056	7.22582
	Historical	1989	Dry	9.12184	9.2369	8.79165	9.6822	8.10591	8.1692	7.8607	8.4777	6.75693	7.09034	6.32256	7.8581	7.21969	7.10471	6.67844	7.53098	6.62936	6.82063	6.52856	7.1127
	Historical	1990	Dry	8.91463	8.8465	8.40126	9.2918	8.23986	8.36587	8.05749	8.67426	7.6039	7.30104	6.53333	8.0687	7.32055	7.38442	6.95824	7.81061	6.40026	6.50802	6.21645	6.79958
	Historical	1991	Dry	8.86954	8.9436	8.4983	9.3889	8.00437	8.19899	7.89064	8.50734	7.7907	7.24183	6.47417	8.0095	7.092	7.28332	6.85718	7.70945	6.74993	6.68636	6.39526	6.97746
	Historical	1992	Dry	8.88086	8.8919	8.4466	9.3372	7.84031	8.11814	7.80989	8.4264	7.27656	7.7088	6.94116	8.4764	7.15929	7.08144	6.65548	7.5074	6.72743	6.92691	6.63623	7.2176
	Historical	1993	Dry	8.33759	8.6123	8.16706	9.0576	8.06934	7.90386	7.59563	8.21209	7.83003	7.49482	6.72719	8.2624	6.97728	7.02015	6.59455	7.44575	6.54679	6.45645	6.16615	6.74676
	Historical	1994	Dry	9.17409	8.9356	8.49035	9.3809	7.80221	7.92218	7.61403	8.23033	7.31986	7.25388	6.48626	8.0215	6.72623	7.02242	6.59685	7.44798	6.59987	6.55721	6.26725	6.84718
	Historical	1995	Dry	8.59026	8.5876	8.14236	9.0329	7.90581	8.07549	7.76736	8.38361	7.58832	7.50575	6.73812	8.2734	7.35692	7.14171	6.71618	7.56724	7.56476	7.20609	6.91644	7.49575
	Historical	1996	Dry	8.29355	8.8878	8.4425	9.333	7.75791	7.90544	7.59738	8.2135	7.41698	6.87453	6.10691	7.6421	7.26753	7.12891	6.70356	7.55426	7.41878	7.46817	7.17878	7.75755
	Historical	1997	Dry	8.63923	8.6489	8.20367	9.0942	8.39773	8.13832	7.83028	8.44636	8.05738	7.77477	7.00716	8.5424	7.37337	7.25354	6.82842	7.67867	7.32515	7.12531	6.83617	7.41445
	Historical	1998	Dry	8.86432	8.8922	8.44692	9.3375	7.95928	8.07307	7.76509	8.38105	7.84971	7.70317	6.93557	8.4708	6.93342	7.13855	6.71344	7.56366	7.19444	7.12784	6.83891	7.41676
	Historical	1999	Dry	9.69332	9.251	8.80572	9.6962	8.49167	8.25487	7.94691	8.56284	8.11552	7.5755	6.80793	8.3431	7.57302	7.41895	6.99387	7.84403	7.40306	7.66317	7.37443	7.95191
	Historical	2000	Dry	9.42052	9.3495	8.90422	9.7947	8.6063	8.43622	8.12831	8.74413	7.48381	7.579	6.81146	8.3465	7.34084	7.15386	6.72896	7.57876	6.92067	6.90271	6.61412	7.19129
	Historical	2001	Dry	9.50651	9.5489	9.10365	9.9942	8.45212	8.29167	7.98378	8.59957	7.11151	7.48444	6.71695	8.2519	6.92166	7.02911	6.60434	7.45389	6.77422	6.83604	6.54759	7.1245
	Historical	2002	Dry	9.19421	9.3487	8.90348	9.794	8.23959	8.25126	7.94341	8.55911	7.08003	7.62675	6.8593	8.3942	7.08339	7.18866	6.7639	7.61342	5.79606	6.15419	5.86584	6.44254
	Historical	2003	Dry	9.29725	9.4392	8.994	9.8845	8.20713	8.28917	7.98133	8.597	7.74716	8.24669	7.47929	9.0141	6.58893	7.18507	6.76033	7.6098	6.14419	6.17217	5.8839	6.46043
	Historical	2004	Dry	8.68677	9.41	8.96476	9.8553	8.16905	8.13101	7.82322	8.43881	8.14352	8.30778	7.54043	9.0751	6.79906	6.93795	6.51339	7.36251	6.85751	6.79966	6.51147	7.08786
	Historical	2005	Dry	9.11844	8.9791	8.53383	9.4243	8.53915	8.46677	8.15899	8.77455	7.82883	7.7383	6.971	8.5056	7.03615	6.9419	6.5174	7.3664	6.2804	6.485	6.19685	6.77314
	Historical	2006	Dry	8.45297	8.7218	8.27658	9.1671	8.23933	8.38131	8.07356	8.68906	7.62364	7.52397	6.75671	8.2912	6.67708	7.05503	6.63055	7.47951	6.04501	6.33653	6.04842	6.62464
	Historical	2007	Dry	9.28089	9.0604	8.61519	9.5057	8.47199	8.21561	7.90787	8.52335	7.46279	7.52393	6.7567	8.2912	7.36391	6.68617	6.26172	7.11062	6.32436	5.98272	5.69463	6.2708
	Historical	2008	Dry	9.2617	9.2289	8.7837	9.6742	8.60995	8.71211	8.4044	9.01982	8.05007	7.89076	7.12356	8.658	6.64769	6.78126	6.35696	7.20557	6.18002	6.13854	5.85047	6.42661
	Historical	2009	Dry	9.09628	9.0502	8.60495	9.4954	8.87933	8.67212	8.36442	8.97982	7.65776	7.74787	6.9807	8.515	6.85224	6.97966	6.55539	7.40393	6.3081	6.29136	6.0033	6.57941
	Historical	2010	Dry	9.23367	9.195	8.74973	9.6402	8.47991	8.7996	8.49193	9.10726	7.80507	7.81333	7.04618	8.5805	5.83773	6.17252	5.74826	6.59678	6.47851	6.47248	6.18443	6.76053
	Historical	2011	Dry	8.80837	9.3949	8.94963	9.8401	8.28375	8.40566	8.09801	8.71332	8.58914	7.90124	7.1341	8.6684	6.6733	6.40324	5.97902	6.82745	5.78996	5.85823	5.57019	6.14627
	Historical	2012	Dry	9.09403	8.9276	8.48238	9.3729	8.08825	8.37599	8.06836	8.68362	7.69348	8.30755	7.54042	9.0747	7.02108	6.89136	6.46726	7.31546	5.72685	5.75105	5.46302	6.03908
	RCP 2.6	2013	Dry	.	8.9377	8.49244	9.3829	.	8.3086	8.0017	8.6155	.	7.79292	7.02634	8.5595	.	5.92794	5.52128	6.33461	.	5.31175	5.0559	5.5676
	RCP 2.6	2014	Dry	.	9.019	8.54459	9.4934	.	8.38432	8.05918	8.70946	.	8.65367	7.85055	9.4568	.	6.4077	5.98624	6.82917	.	5.90956	5.57361	6.24551
	RCP 2.6	2015	Dry	.	9.3842	8.83387	9.9345	.	8.26921	7.92645	8.61197	.	8.25177	7.43461	9.0689	.	6.79242	6.36978	7.21505	.	6.26025	5.81939	6.70111
	RCP 2.6	2016	Dry	.	9.3377	8.74648	9.929	.	8.58765	8.23874	8.93656	.	8.42599	7.60606	9.2459	.	6.11943	5.68259	6.55627	.	6.20593	5.61172	6.80014
	RCP 2.6	2017	Dry	.	9.7124	9.05515	10.3697	.	8.63435	8.28443	8.98428	.	8.0409	7.19513	8.8867	.	6.43265	5.99095	6.87435	.	5.44758	4.8092	6.08596
	RCP 2.6	2018	Dry	.	9.7052	8.96446	10.446	.	8.76285	8.41022	9.11548	.	8.65543	7.77197	9.5389	.	6.91669	6.46907	7.36431	.	6.00332	5.36162	6.64502
	RCP 2.6	2019	Dry	.	10.0739	9.26112	10.8867	.	8.62861	8.27439	8.98284	.	8.46113	7.5513	9.371	.	5.93337	5.48401	6.38272	.	5.69541	5.04495	6.34586
	RCP 2.6	2020	Dry	.	10.1086	9.24429	10.9729	.	8.67621	8.321	9.03141	.	8.73434	7.81072	9.658	.	6.38195	5.92418	6.83973	.	5.7724	5.10207	6.44272
	RCP 2.6	2021	Dry	.	10.01	9.11466	10.9052	.	8.63059	8.27415	8.98703	.	8.60239	7.6724	9.5324	.	6.54113	6.07684	7.00542	.	5.27376	4.59637	5.95114
	RCP 2.6	2022	Dry	.	10.148	9.23918	11.0567	.	8.60698	8.24968	8.96428	.	8.6824	7.74912	9.6157	.	5.87509	5.41051	6.33967	.	5.29005	4.61224	5.96786
	RCP 2.6	2023	Dry	.	10.3221	9.41059	11.2335	.	8.50936	8.1512	8.86752	.	9.01779	8.08249	9.9531	.	6.38014	5.90677	6.8535	.	5.34729	4.66815	6.02643
	RCP 2.6	2024	Dry	.	10.472	9.55998	11.3839	.	8.47924	8.12024	8.83824	.	8.64271	7.70597	9.5795	.	6.5161	6.03836	6.99383	.	5.70779	5.02534	6.39025
	RCP 2.6	2025	Dry	.	10.3681	9.45037	11.2859	.	8.62182	8.26214	8.9815	.	8.23652	7.29873	9.1743	.	6.02375	5.54568	6.50182	.	5.28371	4.59992	5.96749
	RCP 2.6	2026	Dry	.	10.2035	9.27088	11.1361	.	8.6054	8.24502	8.96577	.	8.20951	7.27099	9.148	.	6.58894	6.10424	7.07363	.	5.25416	4.57027	5.93806
	RCP 2.6	2027	Dry	.	9.9218	8.96602	10.8775	.	8.55374	8.19273	8.91475	.	8.40206	7.46305	9.3411	.	6.64421	6.15734	7.13108	.	5.47048	4.78633	6.15463
	RCP 2.6	2028	Dry	.	9.4819	8.49902	10.4647	.	8.66503	8.30346	9.02661	.	8.69891	7.75959	9.6382	.	6.10058	5.61338	6.58777	.	5.46136	4.77662	6.1461
	RCP 2.6	2029	Dry	.	9.2703	8.26175	10.2789	.	8.58976	8.22764	8.95189	.	9.06841	8.12889	10.0079	.	6.37885	5.88752	6.87018	.	5.27744	4.59243	5.96245
	RCP 2.6	2030	Dry	.	9.042	8.01338	10.0707	.	8.52049	8.15787	8.88312	.	9.22959	8.28995	10.1692	.	6.33984	5.84768	6.832	.	5.69531	5.01027	6.38035
	RCP 2.6	2031	Dry	.	9.05	8.00891	10.0911	.	8.51632	8.15323	8.8794	.	8.52286	7.58313	9.4626	.	5.90192	5.40952	6.39431	.	5.88974	5.20464	6.57484
	RCP 2.6	2032	Dry	.	8.7585	7.71191	9.8051	.	8.6961	8.33257	9.05963	.	8.38163	7.44184	9.3214	.	6.33827	5.84362	6.83292	.	5.66051	4.9753	6.34572
	RCP 2.6	2033	Dry	.	8.868	7.82028	9.9158	.	8.54492	8.18099	8.90885	.	8.36629	7.42646	9.3061	.	6.26824	5.77336	6.76313	.	5.03552	4.35025	5.72079
	RCP 2.6	2034	Dry	.	9.0837	8.03575	10.1316	.	8.44852	8.08421	8.81282	.	8.82094	7.88109	9.7608	.	6.17496	5.67992	6.66999	.	5.51761	4.83233	6.20289
	RCP 2.6	2035	Dry	.	9.5207	8.47047	10.571	.	8.40409	8.03944	8.76875	.	8.44307	7.50321	9.3829	.	6.32182	5.82567	6.81796	.	5.81886	5.13356	6.50416
	RCP 2.6	2036	Dry	.	9.5439	8.4876	10.6002	.	8.61159	8.24661	8.97657	.	8.19512	7.25525	9.135	.	6.34574	5.84955	6.84194	.	5.67749	4.99217	6.36281
	RCP 2.6	2037	Dry	.	9.5755	8.5096	10.6413	.	8.60517	8.23989	8.97045	.	8.18233	7.24245	9.1222	.	6.4169	5.92062	6.91318	.	5.22936	4.54403	5.91469
	RCP 2.6	2038	Dry	.	9.7929	8.71556	10.8701	.	8.5472	8.18164	8.91276	.	8.49899	7.55911	9.4389	.	6.53668	6.0399	7.03347	.	5.70324	5.01791	6.38857
	RCP 2.6	2039	Dry	.	9.5971	8.5087	10.6854	.	8.60803	8.2422	8.97385	.	8.71861	7.77873	9.6585	.	6.2386	5.74179	6.73541	.	5.80537	5.12003	6.49071
	RCP 2.6	2040	Dry	.	9.6337	8.53659	10.7308	.	8.54105	8.17498	8.90712	.	8.54663	7.60674	9.4865	.	6.11657	5.61971	6.61343	.	5.57488	4.88954	6.26022
	RCP 2.6	2041	Dry	.	9.4724	8.36977	10.5751	.	8.47552	8.10923	8.84182	.	8.8062	7.8663	9.7461	.	6.39064	5.89357	6.8877	.	5.82914	5.1438	6.51449
	RCP 2.6	2042	Dry	.	9.3928	8.28768	10.4979	.	8.49565	8.12914	8.86215	.	8.34033	7.40044	9.2802	.	6.09973	5.60262	6.59683	.	6.01307	5.32773	6.69842
	RCP 2.6	2043	Dry	.	9.1555	8.04985	10.2611	.	8.56173	8.19503	8.92843	.	8.16902	7.22913	9.1089	.	6.02984	5.53271	6.52697	.	5.80659	5.12124	6.49193
	RCP 2.6	2044	Dry	.	9.414	8.30825	10.5197	.	8.38996	8.02308	8.75684	.	8.17095	7.23106	9.1108	.	6.38919	5.89198	6.8864	.	5.87183	5.18648	6.55718
	RCP 2.6	2045	Dry	.	9.228	8.12124	10.3347	.	8.59438	8.22732	8.96143	.	8.51469	7.57479	9.4546	.	6.41474	5.91748	6.91199	.	6.28289	5.59754	6.96823
	RCP 2.6	2046	Dry	.	9.3574	8.24805	10.4668	.	8.68822	8.32101	9.05543	.	8.29202	7.35213	9.2319	.	6.1125	5.61523	6.60977	.	5.48053	4.79519	6.16588
	RCP 2.6	2047	Dry	.	9.4051	8.29147	10.5187	.	8.68765	8.32029	9.05501	.	9.03568	8.09579	9.9756	.	6.54409	6.04679	7.0414	.	5.95948	5.27414	6.64483
	RCP 2.6	2048	Dry	.	9.7603	8.64154	10.879	.	8.4232	8.0557	8.79069	.	8.51712	7.57722	9.457	.	6.18221	5.68487	6.67954	.	6.0387	5.35335	6.72405
	RCP 2.6	2049	Dry	.	9.4587	8.33492	10.5824	.	8.67112	8.3035	9.03874	.	8.27326	7.33337	9.2132	.	6.14042	5.64307	6.63777	.	5.93153	5.24619	6.61688
	RCP 2.6	2050	Dry	.	9.7845	8.65672	10.9122	.	8.47295	8.10521	8.84069	.	8.12709	7.1872	9.067	.	6.45535	5.95799	6.9527	.	5.13732	4.45197	5.82267
	RCP 2.6	2051	Dry	.	10.1247	8.99444	11.255	.	8.52658	8.15873	8.89444	.	8.76553	7.82564	9.7054	.	6.48353	5.98615	6.98091	.	5.77288	5.08753	6.45823
	RCP 2.6	2052	Dry	.	10.4914	9.36001	11.6228	.	8.58988	8.22193	8.95784	.	8.48307	7.54317	9.423	.	6.40939	5.912	6.90678	.	5.64822	4.96287	6.33357
	RCP 2.6	2053	Dry	.	10.6886	9.55696	11.8203	.	8.88154	8.51349	9.24959	.	8.59226	7.65236	9.5322	.	6.78663	6.28923	7.28402	.	5.81259	5.12724	6.49794
	RCP 2.6	2054	Dry	.	10.6255	9.49383	11.7572	.	8.81201	8.44387	9.18015	.	8.69712	7.75723	9.637	.	6.50475	6.00734	7.00217	.	5.06522	4.37987	5.75057
	RCP 2.6	2055	Dry	.	10.8674	9.7353	11.9996	.	8.79513	8.4269	9.16335	.	8.7845	7.8446	9.7244	.	6.40152	5.9041	6.89893	.	5.15431	4.46896	5.83965
	RCP 2.6	2056	Dry	.	10.7008	9.56742	11.8341	.	8.72743	8.35912	9.09573	.	9.1481	8.2082	10.088	.	6.57513	6.07771	7.07255	.	5.19685	4.5115	5.8822
	RCP 2.6	2057	Dry	.	10.5694	9.43408	11.7046	.	8.75755	8.38917	9.12592	.	8.82229	7.8824	9.7622	.	6.29801	5.80058	6.79544	.	5.08646	4.40111	5.7718
	RCP 2.6	2058	Dry	.	10.2634	9.12577	11.401	.	8.84747	8.47903	9.21591	.	9.03696	8.09707	9.9769	.	6.27051	5.77308	6.76794	.	4.83213	4.14678	5.51748
	RCP 2.6	2059	Dry	.	10.1989	9.059	11.3388	.	8.67424	8.30573	9.04274	.	9.05274	8.11284	9.9926	.	6.33518	5.83774	6.83261	.	4.8107	4.12535	5.49605
	RCP 2.6	2060	Dry	.	10.0027	8.86091	11.1445	.	8.66959	8.30103	9.03815	.	9.17141	8.23151	10.1113	.	6.24115	5.74371	6.73859	.	5.09695	4.4116	5.7823
	RCP 2.6	2061	Dry	.	10.0541	8.91115	11.1971	.	8.66862	8.3	9.03723	.	8.88366	7.94377	9.8236	.	6.11318	5.61574	6.61063	.	4.74982	4.06447	5.43517
	RCP 2.6	2062	Dry	.	9.991	8.84749	11.1345	.	8.71573	8.34706	9.08439	.	8.90357	7.96367	9.8435	.	6.36983	5.87239	6.86727	.	4.83065	4.1453	5.516
	RCP 2.6	2063	Dry	.	10.0617	8.91811	11.2053	.	8.71659	8.34788	9.0853	.	8.63739	7.69749	9.5773	.	6.32545	5.828	6.8229	.	4.83024	4.14489	5.51558
	RCP 2.6	2064	Dry	.	9.9418	8.79818	11.0854	.	8.85707	8.48831	9.22582	.	8.72599	7.78609	9.6659	.	6.2855	5.78805	6.78295	.	4.89171	4.20636	5.57706
	RCP 2.6	2065	Dry	.	9.9406	8.79674	11.0844	.	8.82039	8.45159	9.18918	.	8.80087	7.86097	9.7408	.	6.35076	5.85331	6.84821	.	4.59751	3.91216	5.28286
	RCP 2.6	2066	Dry	.	9.4144	8.26999	10.5587	.	8.94598	8.57715	9.31482	.	9.23027	8.29037	10.1702	.	6.29619	5.79874	6.79364	.	4.95695	4.2716	5.6423
	RCP 2.6	2067	Dry	.	9.4813	8.33604	10.6266	.	8.79733	8.42846	9.1662	.	9.04847	8.10857	9.9884	.	5.79714	5.29969	6.29459	.	4.56155	3.87621	5.2469
	RCP 2.6	2068	Dry	.	9.2459	8.09952	10.3922	.	8.86709	8.49819	9.23599	.	9.74636	8.80647	10.6863	.	6.02545	5.52799	6.5229	.	5.0191	4.33375	5.70445
	RCP 2.6	2069	Dry	.	9.4841	8.33669	10.6315	.	8.70168	8.33274	9.07061	.	9.2001	8.2602	10.14	.	5.84737	5.34992	6.34482	.	4.79308	4.10773	5.47843
	RCP 2.6	2070	Dry	.	9.5621	8.41387	10.7104	.	8.9993	8.63034	9.36826	.	9.1391	8.1992	10.079	.	5.75436	5.25691	6.25181	.	5.09657	4.41122	5.78192
	RCP 2.6	2071	Dry	.	9.4499	8.30107	10.5987	.	8.91429	8.54531	9.28328	.	8.73057	7.79068	9.6705	.	5.90423	5.40678	6.40169	.	4.78059	4.09524	5.46594
	RCP 2.6	2072	Dry	.	9.1131	7.964	10.2622	.	8.94574	8.57673	9.31475	.	8.75787	7.81798	9.6978	.	5.8725	5.37504	6.36995	.	5.02305	4.3377	5.7084
	RCP 2.6	2073	Dry	.	9.1721	8.02297	10.3212	.	8.70179	8.33276	9.07083	.	8.98116	8.04127	9.9211	.	5.38602	4.88856	5.88347	.	4.51021	3.82486	5.19556
	RCP 2.6	2074	Dry	.	9.0065	7.85736	10.1557	.	8.60761	8.23855	8.97666	.	9.5594	8.61951	10.4993	.	5.81083	5.31338	6.30829	.	5.1658	4.48045	5.85115
	RCP 2.6	2075	Dry	.	9.1103	7.96104	10.2595	.	8.61327	8.2442	8.98235	.	9.09108	8.15118	10.031	.	5.63102	5.13357	6.12848	.	5.32299	4.63764	6.00834
	RCP 2.6	2076	Dry	.	8.9631	7.81359	10.1126	.	8.75022	8.38113	9.11932	.	8.88955	7.94965	9.8294	.	5.44019	4.94273	5.93764	.	5.52866	4.84331	6.21401
	RCP 2.6	2077	Dry	.	9.0527	7.90279	10.2026	.	8.57155	8.20244	8.94066	.	8.48848	7.54858	9.4284	.	5.83368	5.33623	6.33113	.	5.47262	4.78728	6.15797
	RCP 2.6	2078	Dry	.	9.1572	8.00675	10.3076	.	8.52807	8.15894	8.8972	.	8.33214	7.39225	9.272	.	5.78982	5.29236	6.28727	.	5.74759	5.06224	6.43294
	RCP 2.6	2079	Dry	.	9.1037	7.95278	10.2546	.	8.59436	8.22522	8.96351	.	8.36762	7.42773	9.3075	.	5.74145	5.24399	6.2389	.	5.52145	4.83611	6.2068
	RCP 2.6	2080	Dry	.	9.2706	8.1193	10.4219	.	8.61703	8.24787	8.98618	.	8.55028	7.61039	9.4902	.	6.13912	5.64166	6.63657	.	5.73125	5.0459	6.4166
	RCP 2.6	2081	Dry	.	9.8809	8.72931	11.0324	.	8.64224	8.27307	9.01141	.	8.81845	7.87856	9.7583	.	5.96639	5.46894	6.46385	.	5.76611	5.08077	6.45146
	RCP 2.6	2082	Dry	.	10.1374	8.98575	11.2891	.	8.81189	8.44271	9.18108	.	9.06659	8.1267	10.0065	.	6.14575	5.64829	6.6432	.	5.95379	5.26845	6.63914
	RCP 2.6	2083	Dry	.	10.6187	9.46703	11.7705	.	8.83623	8.46704	9.20543	.	8.64017	7.70027	9.5801	.	6.35868	5.86123	6.85614	.	5.50272	4.81737	6.18807
	RCP 2.6	2084	Dry	.	10.8731	9.72143	12.0249	.	8.95675	8.58755	9.32595	.	8.77544	7.83554	9.7153	.	6.14278	5.64533	6.64024	.	5.47229	4.78694	6.15764
	RCP 2.6	2085	Dry	.	10.814	9.6622	11.9657	.	8.7737	8.40448	9.14291	.	8.4794	7.53951	9.4193	.	6.1601	5.66264	6.65756	.	5.14921	4.46386	5.83456
	RCP 2.6	2086	Dry	.	10.6204	9.46849	11.7722	.	8.71707	8.34785	9.08629	.	8.49711	7.55722	9.437	.	6.3844	5.88694	6.88185	.	5.19806	4.51271	5.88341
	RCP 2.6	2087	Dry	.	10.4812	9.32911	11.6332	.	8.62413	8.2549	8.99336	.	8.8743	7.93441	9.8142	.	6.07838	5.58092	6.57583	.	4.97829	4.29294	5.66364
	RCP 2.6	2088	Dry	.	10.3285	9.17616	11.4808	.	8.62817	8.25894	8.99741	.	9.10151	8.16162	10.0414	.	6.21042	5.71297	6.70788	.	5.11513	4.42978	5.80047
	RCP 2.6	2089	Dry	.	10.1438	8.99127	11.2963	.	8.66766	8.29841	9.03691	.	9.06922	8.12932	10.0091	.	6.43072	5.93326	6.92817	.	5.40593	4.72058	6.09128
	RCP 2.6	2090	Dry	.	10.1795	9.02675	11.3322	.	8.69582	8.32657	9.06507	.	8.73737	7.79747	9.6773	.	6.14884	5.65138	6.64629	.	5.60334	4.918	6.28869
	RCP 2.6	2091	Dry	.	9.7327	8.57984	10.8855	.	8.79592	8.42667	9.16518	.	8.52581	7.58591	9.4657	.	6.32423	5.82678	6.82169	.	5.32432	4.63897	6.00967
	RCP 2.6	2092	Dry	.	9.6309	8.47797	10.7838	.	8.75291	8.38364	9.12217	.	8.24479	7.3049	9.1847	.	6.46597	5.96851	6.96342	.	5.05278	4.36743	5.73813
	RCP 2.6	2093	Dry	.	9.3989	8.24597	10.5518	.	8.83648	8.46721	9.20575	.	8.89997	7.96007	9.8399	.	6.31098	5.81353	6.80844	.	5.30633	4.62098	5.99168
	RCP 2.6	2094	Dry	.	9.2134	8.06046	10.3663	.	8.83345	8.46418	9.20273	.	9.08633	8.14644	10.0262	.	6.27951	5.78205	6.77697	.	5.05158	4.36623	5.73693
	RCP 2.6	2095	Dry	.	9.4164	8.26346	10.5693	.	8.89599	8.52671	9.26527	.	9.39135	8.45145	10.3312	.	6.3029	5.80545	6.80036	.	5.1466	4.46125	5.83195
	RCP 2.6	2096	Dry	.	9.3389	8.18591	10.4919	.	8.83591	8.46662	9.20519	.	9.45816	8.51827	10.3981	.	6.10089	5.60344	6.59835	.	5.26707	4.58172	5.95241
	RCP 2.6	2097	Dry	.	9.5773	8.42426	10.7304	.	8.84094	8.47165	9.21023	.	8.66535	7.72546	9.6052	.	6.0559	5.55844	6.55335	.	5.16307	4.47772	5.84842
	RCP 2.6	2098	Dry	.	9.5465	8.39333	10.6997	.	8.94507	8.57578	9.31436	.	8.79192	7.85203	9.7318	.	6.19733	5.69987	6.69478	.	4.94363	4.25828	5.62898
	RCP 2.6	2099	Dry	.	9.6146	8.46133	10.7679	.	8.83787	8.46858	9.20717	.	8.8912	7.9513	9.8311	.	6.14477	5.64732	6.64223	.	4.70872	4.02337	5.39407
	RCP 2.6	2100	Dry	.	9.5077	8.35436	10.6611	.	8.87832	8.50902	9.24762	.	9.31673	8.37684	10.2566	.	6.1022	5.60474	6.59965	.	4.89874	4.21339	5.58409
	Historical	1964	Wet	9.61066	.	.	.	8.52496	.	.	.	2.48491	.	.	.	7.33717	.	.	.	7.2547	.	.	.
	Historical	1965	Wet	9.33724	.	.	.	8.3299	.	.	.	2.19722	.	.	.	7.11477	.	.	.	7.14992	.	.	.
	Historical	1966	Wet	9.35083	.	.	.	8.29113	.	.	.	3.91909	.	.	.	7.46449	.	.	.	7.24542	.	.	.
	Historical	1967	Wet	9.46976	.	.	.	8.25733	.	.	.	3.73095	.	.	.	7.60212	.	.	.	7.26479	.	.	.
	Historical	1968	Wet	9.57623	.	.	.	8.02584	.	.	.	3.2581	.	.	.	7.74028	.	.	.	7.28427	.	.	.
	Historical	1969	Wet	9.57654	9.5762	8.68102	10.4714	8.22382	8.02584	7.4355	8.61618	4.24766	3.2581	2.55535	3.9608	7.8781	7.74028	7.28977	8.1908	7.30344	7.28427	6.75216	7.81638
	Historical	1970	Wet	9.64024	9.5718	9.00566	10.1378	8.10872	8.08124	7.63479	8.52768	4.76786	4.6756	4.01646	5.3347	8.03926	8.03831	7.58976	8.48686	7.37713	7.3301	6.91947	7.74074
	Historical	1971	Wet	9.67118	9.6253	9.08873	10.1619	8.59526	8.60244	8.21964	8.98523	5.09987	5.31418	4.73315	5.8952	8.24302	8.2819	7.84249	8.72131	6.93245	7.0853	6.68708	7.48351
	Historical	1972	Wet	9.59342	9.6113	9.09523	10.1273	8.22778	8.30061	7.99504	8.60618	6.02948	6.16321	5.588	6.7384	7.96572	7.87427	7.542	8.20654	7.3202	7.25214	6.89585	7.60843
	Historical	1973	Wet	9.52927	9.2106	8.75014	9.6711	8.26023	8.28796	7.98722	8.58871	6.81344	6.09793	5.525	6.6709	8.2089	8.1402	7.84643	8.43397	7.47136	7.20011	6.85029	7.54993
	Historical	1974	Wet	9.67859	9.733	9.32186	10.1442	8.25245	8.57934	8.29561	8.86307	6.36475	6.51741	5.94928	7.0855	8.23748	8.18476	7.91858	8.45094	7.2145	7.16957	6.82131	7.51783
	Historical	1975	Wet	9.47665	9.4808	9.10544	9.8562	8.36341	8.46146	8.17939	8.74353	6.79681	7.31089	6.74852	7.8733	8.14176	8.34131	8.07801	8.60461	7.39386	7.35871	7.01194	7.70548
	Historical	1976	Wet	9.21632	9.1061	8.75452	9.4577	8.57678	8.31274	8.03818	8.58729	7.3192	6.94909	6.39234	7.5058	8.13388	8.25055	7.98995	8.51115	7.76089	7.50952	7.16395	7.8551
	Historical	1977	Wet	9.22365	9.1774	8.84238	9.5124	8.72794	8.43755	8.16383	8.71127	6.86797	7.09171	6.54006	7.6434	7.93916	7.87898	7.62632	8.13164	7.15383	7.44473	7.10007	7.78939
	Historical	1978	Wet	9.36413	9.1887	8.86562	9.5117	8.28664	8.26938	7.99989	8.53887	7.06604	7.40134	6.85421	7.9485	8.01611	7.92373	7.67513	8.17232	7.2445	7.34021	6.99631	7.68411
	Historical	1979	Wet	9.48852	9.5011	9.18708	9.8151	8.34681	8.29054	8.02156	8.55953	7.18349	7.31165	6.76851	7.8548	7.90431	7.86305	7.61604	8.11006	7.22871	7.42391	7.08066	7.76715
	Historical	1980	Wet	9.82287	9.8032	9.49619	10.1103	8.35679	8.50967	8.24341	8.77594	7.31255	7.44759	6.90798	7.9872	7.826	7.69109	7.44441	7.93776	7.19664	7.52948	7.18681	7.87216
	Historical	1981	Wet	9.50584	9.6422	9.3407	9.9437	8.29339	8.29371	8.02778	8.55964	7.36915	7.27823	6.74174	7.8147	7.7472	7.9387	7.69609	8.1813	7.16362	7.25569	6.91351	7.59787
	Historical	1982	Wet	9.43468	9.491	9.19398	9.7879	8.26346	8.19362	7.92959	8.45766	7.44629	7.31203	6.77832	7.8457	7.66711	7.6671	7.42539	7.90881	7.13086	7.13127	6.78954	7.47301
	Historical	1983	Wet	9.36352	9.2288	8.93561	9.5221	8.23353	8.03776	7.77396	8.30155	7.52343	7.37251	6.84129	7.9037	7.5904	7.68241	7.44173	7.92309	7.09933	6.99137	6.65004	7.33271
	Historical	1984	Wet	9.29236	9.3035	9.01345	9.5936	8.2036	8.15797	7.89557	8.42037	7.60058	7.68103	7.15204	8.21	7.50987	7.27321	7.03264	7.51378	7.06618	7.14512	6.80414	7.4861
	Historical	1985	Wet	9.2212	9.2579	8.97049	9.5453	8.17368	8.26726	8.00504	8.52948	7.67773	7.87456	7.34757	8.4016	7.43195	7.46881	7.23068	7.70693	7.03391	7.09717	6.75652	7.43783
	Historical	1986	Wet	9.15005	9.1683	8.88319	9.4534	8.14375	8.17511	7.91396	8.43626	7.75489	7.68906	7.16385	8.2143	7.35122	7.34165	7.10368	7.57963	7.00156	7.0045	6.66414	7.34486
	Historical	1987	Wet	9.10631	9.0068	8.72377	9.2899	8.04815	8.07605	7.81504	8.33706	7.90655	7.66422	7.14059	8.1878	7.27446	7.28704	7.04971	7.52437	6.96924	6.96982	6.62973	7.30991
	Historical	1988	Wet	8.74926	8.7081	8.42681	8.9894	7.9413	8.04079	7.78063	8.30095	7.66856	7.97516	7.45292	8.4974	7.19478	7.16186	6.92476	7.39896	6.89972	6.9775	6.63766	7.31735
	Historical	1989	Wet	8.90572	8.9932	8.71341	9.2729	7.87967	7.90567	7.64562	8.16572	7.95578	8.1136	7.59257	8.6346	6.79234	6.90202	6.66639	7.13764	6.89366	6.9016	6.56197	7.24122
	Historical	1990	Wet	9.32563	9.3749	9.09648	9.6533	8.37355	8.36477	8.10541	8.62414	7.98854	7.81376	7.29374	8.3338	7.51043	7.43743	7.20183	7.67303	6.95081	6.72732	6.3879	7.06673
	Historical	1991	Wet	9.13292	9.3465	9.06926	9.6236	8.10621	8.16609	7.90682	8.42536	8.13329	7.925	7.40581	8.4442	7.10414	7.36535	7.1301	7.6006	6.83303	6.88002	6.5408	7.21925
	Historical	1992	Wet	9.26946	9.1812	8.90502	9.4573	8.3395	8.16437	7.90566	8.42307	8.63213	8.38199	7.86348	8.9005	7.12125	7.20133	6.96645	7.4362	7.2349	7.08056	6.74151	7.41962
	Historical	1993	Wet	8.67386	8.7238	8.44856	8.999	8.08672	8.13004	7.87142	8.38867	7.74544	7.70722	7.18921	8.2252	6.88141	7.13867	6.90464	7.3727	6.70319	6.84998	6.51109	7.18888
	Historical	1994	Wet	8.87248	8.5916	8.31719	8.8661	8.11482	7.84239	7.58424	8.10054	8.1278	8.21593	7.69828	8.7336	7.05752	6.95219	6.71822	7.18617	7.00499	6.82364	6.48488	7.16239
	Historical	1995	Wet	8.68677	8.7546	8.48082	9.0284	8.15277	8.14282	7.88473	8.4009	8.22229	8.27206	7.75464	8.7895	6.88551	6.92412	6.6903	7.15793	7.02465	7.21623	6.87761	7.55485
	Historical	1996	Wet	8.78829	9.0755	8.80223	9.3488	7.88382	7.93658	7.6789	8.19426	8.32458	7.8199	7.30261	8.3372	7.30854	7.27222	7.03888	7.50556	7.22257	7.36113	7.02262	7.69963
	Historical	1997	Wet	9.11812	9.1259	8.85308	9.3988	7.92696	8.08401	7.82639	8.34163	8.31238	8.11636	7.59914	8.6336	7.60738	7.55165	7.31874	7.78457	7.30115	7.39944	7.06104	7.73784
	Historical	1998	Wet	8.42574	8.5462	8.27368	8.8187	7.62608	7.74664	7.48937	8.0039	7.77444	8.01723	7.50002	8.5344	7.27794	7.26299	7.03019	7.49578	7.11964	7.03108	6.69277	7.36939
	Historical	1999	Wet	9.46055	9.2166	8.94428	9.4889	8.56102	8.3522	8.09498	8.60942	9.14484	8.81876	8.30155	9.336	7.45876	7.5209	7.28816	7.75365	7.40184	7.32863	6.99039	7.66686
	Historical	2000	Wet	9.29072	9.2742	9.00207	9.5464	8.41804	8.28184	8.02493	8.53876	8.51899	8.43253	7.91533	8.9497	7.42476	7.28162	7.04937	7.51386	7.03527	6.8398	6.50164	7.17796
	Historical	2001	Wet	9.16681	9.1952	8.92309	9.4672	7.71423	7.94926	7.69239	8.20613	7.87626	8.32633	7.80917	8.8435	7.724	7.64837	7.41631	7.88043	6.67203	6.76551	6.4274	7.10361
	Historical	2002	Wet	9.04488	9.055	8.78296	9.327	8.28223	8.14958	7.89298	8.40618	8.17132	8.30292	7.78585	8.82	7.7003	7.57851	7.34659	7.81043	6.8742	6.5768	6.23874	6.91486
	Historical	2003	Wet	8.65277	8.7173	8.44527	8.9893	8.19091	8.41256	8.156	8.66913	8.04527	8.12925	7.6123	8.6462	7.51915	7.27639	7.04449	7.50829	6.68085	6.36368	6.02567	6.7017
	Historical	2004	Wet	8.46884	8.8906	8.6186	9.1627	8.00837	8.11967	7.86335	8.376	7.81238	7.84225	7.32548	8.359	7.15149	7.14909	6.91765	7.38053	6.57508	6.66694	6.32895	7.00492
	Historical	2005	Wet	8.86291	8.8155	8.54345	9.0875	8.57225	8.59611	8.33982	8.8524	7.48997	7.61446	7.0979	8.131	7.41818	7.3814	7.15002	7.61279	6.89366	6.6025	6.26454	6.94046
	Historical	2006	Wet	8.1274	8.1453	7.87325	8.4173	8.15622	8.14633	7.89025	8.40241	8.04141	8.01792	7.5016	8.5342	7.34601	7.3625	7.13125	7.59375	6.63988	6.47208	6.13413	6.81002
	Historical	2007	Wet	7.89133	7.9354	7.66344	8.2074	8.02093	8.13384	7.87779	8.38989	7.87246	7.67639	7.16033	8.1924	6.58893	6.78836	6.55715	7.01957	5.30827	5.8381	5.50017	6.17603
	Historical	2008	Wet	9.02714	8.9811	8.70911	9.2531	8.60227	8.53723	8.28137	8.79309	8.21338	8.19073	7.67495	8.7065	6.36819	6.62617	6.39533	6.857	6.41999	6.31033	5.9724	6.64825
	Historical	2009	Wet	9.39325	9.2497	8.97771	9.5216	8.537	8.48204	8.22621	8.73787	8.10289	8.23779	7.72228	8.7533	7.04925	7.00521	6.77438	7.23603	6.22654	6.22934	5.89142	6.56726
	Historical	2010	Wet	9.04853	9.026	8.75403	9.2979	8.63533	8.47115	8.21549	8.72681	8.00903	8.21028	7.69503	8.7255	6.49527	6.34108	6.11036	6.57181	6.31536	6.24009	5.90218	6.57801
	Historical	2011	Wet	8.53935	8.9613	8.68935	9.2332	8.22229	8.26287	8.00724	8.5185	8.9813	8.4583	7.94329	8.9733	6.27852	6.38108	6.15045	6.61172	5.8693	6.01023	5.67231	6.34814
	Historical	2012	Wet	9.30647	9.17	8.89807	9.4419	8.50573	8.33908	8.08361	8.59456	8.19146	8.52476	8.00995	9.0396	7.08506	6.93204	6.70167	7.1624	5.74939	5.93363	5.59572	6.27154
	RCP 2.6	2013	Wet	.	8.8182	8.54757	9.0888	.	8.29721	8.04549	8.54894	.	8.17397	7.66383	8.6841	.	5.75432	5.62664	5.88199	.	5.96412	5.70882	6.21942
	RCP 2.6	2014	Wet	.	8.7542	8.42279	9.0856	.	8.13334	7.8779	8.38878	.	8.33775	7.75632	8.9192	.	6.44454	6.21797	6.67111	.	6.28862	5.906	6.67124
	RCP 2.6	2015	Wet	.	8.8237	8.3884	9.259	.	7.93996	7.62965	8.25028	.	8.20068	7.55888	8.8425	.	6.68526	6.45281	6.91771	.	5.86247	5.4033	6.32164
	RCP 2.6	2016	Wet	.	9.4176	8.87584	9.9594	.	8.23002	7.88537	8.57468	.	8.31313	7.64826	8.978	.	5.64552	5.32272	5.96832	.	5.95501	5.4618	6.44823
	RCP 2.6	2017	Wet	.	9.543	8.96601	10.12	.	8.0566	7.69554	8.41766	.	8.10745	7.42637	8.7885	.	6.30503	5.97208	6.63797	.	5.70626	5.20163	6.21088
	RCP 2.6	2018	Wet	.	9.5578	8.97163	10.1439	.	8.1375	7.75113	8.52387	.	8.53363	7.84523	9.222	.	6.94849	6.6092	7.28779	.	5.97486	5.46043	6.48928
	RCP 2.6	2019	Wet	.	9.3208	8.7337	9.908	.	8.0266	7.6234	8.4298	.	8.25486	7.56141	8.9483	.	5.58634	5.23259	5.94009	.	5.63151	5.10833	6.15469
	RCP 2.6	2020	Wet	.	9.373	8.78324	9.9628	.	8.05509	7.63636	8.47381	.	8.69171	7.99527	9.3882	.	6.16133	5.79092	6.53173	.	5.73729	5.20994	6.26464
	RCP 2.6	2021	Wet	.	9.1437	8.54084	9.7466	.	8.09435	7.66025	8.52845	.	8.26813	7.56954	8.9667	.	6.55869	6.17961	6.93777	.	5.44151	4.91298	5.97005
	RCP 2.6	2022	Wet	.	9.0472	8.41856	9.6759	.	8.18864	7.74285	8.63442	.	8.44373	7.74373	9.1437	.	5.72976	5.3483	6.11122	.	5.70537	5.17568	6.23506
	RCP 2.6	2023	Wet	.	8.7402	8.07727	9.4031	.	8.1981	7.7406	8.6556	.	8.70403	8.00307	9.405	.	6.37983	5.9794	6.78026	.	5.59209	5.06117	6.12302
	RCP 2.6	2024	Wet	.	8.7841	8.08551	9.4826	.	8.28747	7.81931	8.75563	.	8.66197	7.96039	9.3635	.	6.45933	6.05259	6.86607	.	5.4852	4.9537	6.01671
	RCP 2.6	2025	Wet	.	8.9077	8.17864	9.6369	.	8.45161	7.97436	8.92886	.	8.59725	7.89526	9.2992	.	5.86024	5.45258	6.2679	.	5.4148	4.88318	5.94642
	RCP 2.6	2026	Wet	.	8.625	7.8744	9.3757	.	8.215	7.72895	8.70105	.	8.70261	8.00036	9.4049	.	6.67603	6.2534	7.09866	.	5.5013	4.96954	6.03306
	RCP 2.6	2027	Wet	.	8.3116	7.54919	9.074	.	8.0508	7.55683	8.54477	.	8.53659	7.83417	9.239	.	6.53727	6.11142	6.96311	.	5.47984	4.94789	6.01178
	RCP 2.6	2028	Wet	.	8.1991	7.43264	8.9657	.	8.23443	7.73333	8.73554	.	8.34814	7.64561	9.0507	.	5.95539	5.52875	6.38203	.	5.63119	5.09916	6.16322
	RCP 2.6	2029	Wet	.	8.0621	7.29524	8.829	.	8.15642	7.64859	8.66425	.	8.36361	7.661	9.0662	.	6.49275	6.05647	6.92902	.	5.77868	5.24664	6.31072
	RCP 2.6	2030	Wet	.	8.1649	7.39703	8.9327	.	8.2211	7.70719	8.73502	.	8.68501	7.98235	9.3877	.	6.13179	5.69429	6.56929	.	5.92703	5.39497	6.45908
	RCP 2.6	2031	Wet	.	8.5274	7.75482	9.2999	.	8.25908	7.73956	8.77861	.	8.50948	7.8068	9.2122	.	5.43534	4.9972	5.87347	.	5.66386	5.13177	6.19594
	RCP 2.6	2032	Wet	.	8.8763	8.09432	9.6583	.	8.42126	7.89653	8.94599	.	8.43208	7.72937	9.1348	.	6.47111	6.02756	6.91466	.	5.61792	5.08582	6.15002
	RCP 2.6	2033	Wet	.	8.8056	8.01053	9.6006	.	8.29263	7.76313	8.82213	.	8.35522	7.65249	9.0579	.	6.42394	5.98005	6.86783	.	5.63234	5.10024	6.16444
	RCP 2.6	2034	Wet	.	8.8051	7.99593	9.6143	.	8.3725	7.83859	8.90641	.	8.89552	8.19279	9.5983	.	6.00386	5.55952	6.44819	.	5.9161	5.384	6.44821
	RCP 2.6	2035	Wet	.	8.9764	8.15473	9.7981	.	8.36861	7.83062	8.9066	.	8.51438	7.81164	9.2171	.	6.27472	5.82765	6.72179	.	5.58725	5.05514	6.11935
	RCP 2.6	2036	Wet	.	9.4287	8.598	10.2595	.	8.50795	7.96619	9.0497	.	8.48325	7.78051	9.186	.	6.34743	5.90028	6.79458	.	5.58853	5.05643	6.12064
	RCP 2.6	2037	Wet	.	9.3084	8.47262	10.1442	.	8.39122	7.84598	8.93646	.	8.50053	7.79779	9.2033	.	6.40493	5.95749	6.85236	.	5.63434	5.10223	6.16645
	RCP 2.6	2038	Wet	.	9.0883	8.25072	9.9259	.	8.21595	7.66749	8.76442	.	8.65051	7.94776	9.3533	.	6.43168	5.98299	6.88037	.	5.88721	5.3551	6.41932
	RCP 2.6	2039	Wet	.	8.9218	8.08404	9.7595	.	8.36708	7.81563	8.91853	.	8.27671	7.57396	8.9795	.	6.24348	5.79472	6.69224	.	5.84852	5.31641	6.38063
	RCP 2.6	2040	Wet	.	8.844	8.00583	9.6821	.	8.31152	7.7573	8.86574	.	8.3154	7.61266	9.0182	.	6.08596	5.63703	6.53489	.	5.92901	5.39691	6.46112
	RCP 2.6	2041	Wet	.	8.8166	7.97643	9.6567	.	8.23589	7.67911	8.79267	.	8.71376	8.01101	9.4165	.	6.04775	5.59829	6.49721	.	6.06565	5.53354	6.59776
	RCP 2.6	2042	Wet	.	8.8352	7.99107	9.6794	.	8.37249	7.81334	8.93165	.	8.23015	7.5274	8.9329	.	5.92102	5.47146	6.37058	.	5.92732	5.39521	6.45943
	RCP 2.6	2043	Wet	.	9.0372	8.18733	9.887	.	8.39781	7.83645	8.95917	.	8.41535	7.71261	9.1181	.	5.87034	5.42068	6.32	.	6.23154	5.69943	6.76365
	RCP 2.6	2044	Wet	.	8.6995	7.84347	9.5555	.	7.98858	7.42518	8.55198	.	8.40339	7.70064	9.1061	.	6.00267	5.55281	6.45254	.	5.85804	5.32593	6.39015
	RCP 2.6	2045	Wet	.	9.0808	8.21916	9.9424	.	8.22737	7.66207	8.79267	.	8.27813	7.57538	8.9809	.	6.04896	5.59899	6.49893	.	5.89897	5.36686	6.43108
	RCP 2.6	2046	Wet	.	9.339	8.47331	10.2046	.	8.38573	7.81868	8.95279	.	8.02867	7.32592	8.7314	.	5.88903	5.439	6.33906	.	5.89689	5.36478	6.429
	RCP 2.6	2047	Wet	.	9.2072	8.33927	10.0752	.	8.302	7.7333	8.87069	.	8.82352	8.12077	9.5263	.	6.42814	5.97803	6.87824	.	6.33664	5.80454	6.86875
	RCP 2.6	2048	Wet	.	8.9626	8.09382	9.8314	.	8.07487	7.50466	8.64508	.	8.20322	7.50048	8.906	.	5.91231	5.46211	6.3625	.	5.71722	5.18511	6.24933
	RCP 2.6	2049	Wet	.	9.4237	8.55487	10.2926	.	8.5265	7.95488	9.09812	.	8.59519	7.89244	9.2979	.	5.88678	5.43655	6.33702	.	5.93233	5.40022	6.46444
	RCP 2.6	2050	Wet	.	9.0262	8.15718	9.8952	.	8.19912	7.6262	8.77205	.	8.19788	7.49513	8.9006	.	6.51847	6.0682	6.96873	.	5.57344	5.04134	6.10555
	RCP 2.6	2051	Wet	.	9.0911	8.22115	9.961	.	8.24597	7.67183	8.82011	.	8.69306	7.99031	9.3958	.	6.3079	5.85757	6.75822	.	5.87334	5.34123	6.40545
	RCP 2.6	2052	Wet	.	9.1829	8.31114	10.0546	.	8.3951	7.81982	8.97037	.	8.29541	7.59266	8.9982	.	6.11017	5.65982	6.56052	.	5.34679	4.81468	5.8789
	RCP 2.6	2053	Wet	.	9.4726	8.59833	10.3469	.	8.54727	7.97095	9.12359	.	8.73788	8.03513	9.4406	.	6.81395	6.36359	7.2643	.	5.51634	4.98423	6.04845
	RCP 2.6	2054	Wet	.	9.1179	8.24077	9.995	.	8.36197	7.78467	8.93927	.	8.40547	7.70272	9.1082	.	6.59809	6.14769	7.04849	.	5.31484	4.78273	5.84695
	RCP 2.6	2055	Wet	.	8.6461	7.76643	9.5257	.	8.41173	7.83352	8.98994	.	8.68985	7.9871	9.3926	.	6.55033	6.09992	7.00075	.	5.29763	4.76552	5.82974
	RCP 2.6	2056	Wet	.	8.4832	7.60168	9.3647	.	8.33998	7.76093	8.91903	.	8.76699	8.06425	9.4697	.	6.53477	6.08435	6.98519	.	5.16317	4.63106	5.69528
	RCP 2.6	2057	Wet	.	8.4287	7.54612	9.3113	.	8.4991	7.91926	9.07893	.	8.6431	7.94035	9.3458	.	6.26312	5.81268	6.71356	.	5.04881	4.5167	5.58092
	RCP 2.6	2058	Wet	.	8.3263	7.44333	9.2093	.	8.60512	8.02456	9.18569	.	8.70688	8.00413	9.4096	.	6.48408	6.03362	6.93453	.	5.23487	4.70276	5.76698
	RCP 2.6	2059	Wet	.	7.9016	7.01856	8.7846	.	8.4513	7.87005	9.03254	.	8.70494	8.00219	9.4077	.	6.57959	6.12913	7.03005	.	5.10884	4.57673	5.64095
	RCP 2.6	2060	Wet	.	7.8805	6.99738	8.7635	.	8.66933	8.08745	9.25121	.	8.8528	8.15005	9.5555	.	6.3943	5.94383	6.84477	.	5.12129	4.58918	5.6534
	RCP 2.6	2061	Wet	.	7.9588	7.07531	8.8423	.	8.80097	8.21851	9.38344	.	8.71133	8.00858	9.4141	.	6.38073	5.93025	6.83121	.	4.94239	4.41028	5.4745
	RCP 2.6	2062	Wet	.	8.1417	7.25739	9.026	.	8.82422	8.24121	9.40723	.	9.03332	8.33057	9.7361	.	6.6415	6.19102	7.09198	.	5.07234	4.54023	5.60445
	RCP 2.6	2063	Wet	.	8.0824	7.19693	8.9679	.	8.81427	8.23076	9.39779	.	8.76745	8.0647	9.4702	.	6.61624	6.16575	7.06673	.	4.75296	4.22085	5.28507
	RCP 2.6	2064	Wet	.	8.2904	7.40358	9.1772	.	8.89269	8.3087	9.47668	.	8.93917	8.23642	9.6419	.	6.56321	6.11272	7.0137	.	4.91883	4.38672	5.45094
	RCP 2.6	2065	Wet	.	8.1737	7.2857	9.0616	.	8.6836	8.09917	9.26803	.	8.80198	8.09923	9.5047	.	6.52017	6.06967	6.97066	.	4.75646	4.22435	5.28857
	RCP 2.6	2066	Wet	.	8.2254	7.33652	9.1142	.	8.82902	8.24418	9.41386	.	8.9214	8.21865	9.6241	.	6.52751	6.07701	6.97801	.	5.13305	4.60094	5.66516
	RCP 2.6	2067	Wet	.	7.9868	7.09743	8.8761	.	8.66601	8.08079	9.25123	.	8.40829	7.70555	9.111	.	6.02961	5.57911	6.48011	.	4.92154	4.38943	5.45365
	RCP 2.6	2068	Wet	.	8.1427	7.25316	9.0322	.	8.7915	8.20593	9.37707	.	9.04452	8.34178	9.7473	.	6.1397	5.6892	6.59021	.	5.23831	4.70621	5.77042
	RCP 2.6	2069	Wet	.	8.316	7.4265	9.2056	.	8.73638	8.15047	9.32228	.	8.54332	7.84057	9.2461	.	5.7809	5.3304	6.23141	.	4.76643	4.23432	5.29854
	RCP 2.6	2070	Wet	.	9.0287	8.13915	9.9183	.	9.05343	8.46723	9.63964	.	9.12361	8.42087	9.8264	.	5.59555	5.14505	6.04606	.	5.09844	4.56633	5.63055
	RCP 2.6	2071	Wet	.	9.1036	8.21383	9.9933	.	8.72213	8.13563	9.30862	.	8.82554	8.12279	9.5283	.	5.73342	5.28291	6.18392	.	4.90518	4.37307	5.43729
	RCP 2.6	2072	Wet	.	8.8974	8.00731	9.7876	.	8.79788	8.21112	9.38464	.	8.78784	8.0851	9.4906	.	6.03006	5.57955	6.48057	.	5.18282	4.65071	5.71493
	RCP 2.6	2073	Wet	.	8.5333	7.64266	9.424	.	8.49306	7.90605	9.08007	.	8.53044	7.82769	9.2332	.	5.23545	4.78495	5.68596	.	5.22454	4.69244	5.75665
	RCP 2.6	2074	Wet	.	8.5014	7.61011	9.3927	.	8.54646	7.95923	9.1337	.	8.86242	8.15967	9.5652	.	5.50463	5.05412	5.95514	.	5.47666	4.94455	6.00877
	RCP 2.6	2075	Wet	.	8.9056	8.01375	9.7974	.	8.7347	8.14725	9.32215	.	8.45238	7.74963	9.1551	.	5.25858	4.80807	5.70909	.	5.46301	4.9309	5.99512
	RCP 2.6	2076	Wet	.	9.3252	8.43298	10.2175	.	8.86662	8.27897	9.45427	.	8.76177	8.05902	9.4645	.	5.04483	4.59432	5.49534	.	5.88964	5.35753	6.42175
	RCP 2.6	2077	Wet	.	9.0393	8.14684	9.9318	.	8.57497	7.98713	9.16281	.	8.53443	7.83169	9.2372	.	5.69258	5.24207	6.14309	.	5.70458	5.17247	6.23669
	RCP 2.6	2078	Wet	.	9.1271	8.23457	10.0197	.	8.50416	7.91615	9.09217	.	8.54352	7.84077	9.2463	.	5.35503	4.90452	5.80554	.	5.76085	5.22874	6.29296
	RCP 2.6	2079	Wet	.	9.2844	8.39182	10.177	.	8.5797	7.99152	9.16787	.	8.40977	7.70702	9.1125	.	5.1921	4.74159	5.64261	.	5.75392	5.22181	6.28603
	RCP 2.6	2080	Wet	.	9.3558	8.46322	10.2484	.	8.5146	7.92628	9.10292	.	8.36715	7.6644	9.0699	.	5.88712	5.4366	6.33763	.	6.00843	5.47632	6.54054
	RCP 2.6	2081	Wet	.	9.3025	8.40985	10.1952	.	8.44188	7.85342	9.03034	.	8.19902	7.49627	8.9018	.	5.60129	5.15078	6.05181	.	5.72323	5.19112	6.25534
	RCP 2.6	2082	Wet	.	9.6491	8.75624	10.5419	.	8.66612	8.07753	9.25471	.	8.51673	7.81398	9.2195	.	5.73718	5.28666	6.18769	.	5.66109	5.12898	6.1932
	RCP 2.6	2083	Wet	.	9.8174	8.92427	10.7105	.	8.72545	8.13674	9.31416	.	8.52563	7.82289	9.2284	.	6.11434	5.66383	6.56485	.	5.43872	4.90662	5.97083
	RCP 2.6	2084	Wet	.	9.7006	8.80721	10.594	.	8.76284	8.17402	9.35167	.	8.82371	8.12096	9.5265	.	6.00711	5.55659	6.45762	.	5.53009	4.99798	6.0622
	RCP 2.6	2085	Wet	.	9.2021	8.30842	10.0957	.	8.53193	7.943	9.12085	.	8.57891	7.87616	9.2817	.	6.10745	5.65694	6.55797	.	5.26912	4.73701	5.80123
	RCP 2.6	2086	Wet	.	8.7498	7.85595	9.6436	.	8.56918	7.98016	9.15821	.	8.77924	8.0765	9.482	.	6.32271	5.8722	6.77322	.	5.35399	4.82188	5.8861
	RCP 2.6	2087	Wet	.	8.2786	7.38469	9.1726	.	8.47525	7.88614	9.06437	.	8.46956	7.76681	9.1723	.	5.96616	5.51565	6.41668	.	5.3229	4.79079	5.85501
	RCP 2.6	2088	Wet	.	8.161	7.26705	9.055	.	8.6009	8.0117	9.1901	.	8.53192	7.82917	9.2347	.	6.18326	5.73275	6.63377	.	5.4997	4.96759	6.03181
	RCP 2.6	2089	Wet	.	8.1673	7.27332	9.0613	.	8.75949	8.17021	9.34877	.	8.71353	8.01078	9.4163	.	6.33405	5.88354	6.78456	.	5.55051	5.0184	6.08262
	RCP 2.6	2090	Wet	.	8.2007	7.30676	9.0947	.	8.7098	8.12045	9.29915	.	8.65673	7.95398	9.3595	.	6.01864	5.56813	6.46915	.	5.37866	4.84655	5.91077
	RCP 2.6	2091	Wet	.	8.3853	7.49132	9.2794	.	8.7428	8.15338	9.33222	.	8.70784	8.00509	9.4106	.	6.29694	5.84643	6.74745	.	5.37896	4.84685	5.91106
	RCP 2.6	2092	Wet	.	8.2017	7.30759	9.0958	.	8.56404	7.97456	9.15352	.	8.5633	7.86055	9.266	.	6.43316	5.98265	6.88367	.	5.16961	4.6375	5.70172
	RCP 2.6	2093	Wet	.	8.2768	7.38254	9.171	.	8.48998	7.90044	9.07952	.	8.67618	7.97343	9.3789	.	6.13191	5.6814	6.58243	.	5.30771	4.7756	5.83982
	RCP 2.6	2094	Wet	.	8.3419	7.44751	9.2362	.	8.5764	7.98681	9.166	.	8.34683	7.64408	9.0496	.	6.27627	5.82575	6.72678	.	5.2045	4.67239	5.73661
	RCP 2.6	2095	Wet	.	8.5522	7.65777	9.4467	.	8.6733	8.08365	9.26295	.	8.73574	8.03299	9.4385	.	6.27543	5.82492	6.72595	.	5.34964	4.81753	5.88175
	RCP 2.6	2096	Wet	.	8.8005	7.90597	9.6951	.	8.62327	8.03358	9.21297	.	8.83991	8.13716	9.5427	.	5.84287	5.39235	6.29338	.	5.27749	4.74538	5.8096
	RCP 2.6	2097	Wet	.	9.0447	8.15005	9.9393	.	8.67855	8.08881	9.26829	.	8.659	7.95626	9.3618	.	5.94355	5.49304	6.39407	.	4.99557	4.46346	5.52768
	RCP 2.6	2098	Wet	.	9.2775	8.38285	10.1721	.	8.5943	8.00452	9.18409	.	8.85451	8.15176	9.5573	.	6.01643	5.56592	6.46695	.	5.02318	4.49107	5.55529
	RCP 2.6	2099	Wet	.	9.0815	8.18682	9.9761	.	8.45196	7.86214	9.04178	.	8.54317	7.84042	9.2459	.	6.04195	5.59144	6.49247	.	4.87326	4.34115	5.40537
	RCP 2.6	2100	Wet	.	9.1647	8.27006	10.0593	.	8.66979	8.07993	9.25965	.	8.88231	8.17957	9.5851	.	6.00493	5.55441	6.45544	.	5.44517	4.91306	5.97728
	Historical	1964	Dry	9.90544	.	.	.	8.7126	.	.	.	0	.	.	.	8.55109	.	.	.	7.44882	.	.	.
	Historical	1965	Dry	9.84982	.	.	.	8.61179	.	.	.	0.32792	.	.	.	8.45813	.	.	.	7.44659	.	.	.
	Historical	1966	Dry	9.81764	.	.	.	8.58975	.	.	.	0.41	.	.	.	8.46526	.	.	.	7.36633	.	.	.
	Historical	1967	Dry	9.78552	.	.	.	8.56778	.	.	.	0.50796	.	.	.	8.36651	.	.	.	7.3687	.	.	.
	Historical	1968	Dry	9.75347	.	.	.	8.54587	.	.	.	0.69315	.	.	.	8.35937	.	.	.	7.22766	.	.	.
	Historical	1969	Dry	9.70174	9.7535	8.5995	10.9074	8.48508	8.54587	8.17653	8.91522	0	0.69315	-0.24675	1.633	8.24052	8.35937	7.86191	8.85682	7.44044	7.22766	6.54231	7.91301
	Historical	1970	Dry	9.71008	9.8277	9.24602	10.4094	8.51592	8.37287	8.03602	8.70971	1.17837	0.53666	-0.3581	1.4314	8.23647	8.42265	7.92531	8.92	7.30378	7.43696	6.97913	7.8948
	Historical	1971	Dry	9.72902	9.5933	9.13746	10.0491	8.61686	8.47912	8.14869	8.80956	0	0.69431	-0.18265	1.5713	8.55005	8.2961	7.80076	8.79144	7.30854	7.17952	6.76293	7.59612
	Historical	1972	Dry	9.66491	9.5065	9.05757	9.9554	8.66268	8.43136	8.11462	8.7481	2.56495	2.64693	1.80079	3.4931	8.0762	8.25466	7.78983	8.71949	7.00851	6.74695	6.41344	7.08046
	Historical	1973	Dry	9.63479	9.5395	9.09072	9.9882	8.24892	8.35997	8.04417	8.67577	5.1985	4.31912	3.50016	5.1381	7.83241	8.19713	7.7487	8.64557	7.37526	7.46741	7.1463	7.78851
	Historical	1974	Dry	9.50054	9.6554	9.20755	10.1032	8.46989	8.37706	8.06413	8.68999	4.39445	5.05498	4.25399	5.856	8.32724	8.22488	7.78792	8.66185	7.49443	7.33545	7.01978	7.65112
	Historical	1975	Dry	9.71974	9.3609	8.91385	9.8079	8.50755	8.44514	8.13263	8.75765	5.79909	5.65693	4.86702	6.4468	8.43055	8.34492	7.90835	8.7815	7.61972	7.41124	7.09996	7.72253
	Historical	1976	Dry	9.81143	9.4629	9.01655	9.9093	8.32845	8.30336	7.99211	8.61462	6.10479	5.6903	4.9073	6.4733	8.1374	8.07305	7.63705	8.50904	7.28001	7.42491	7.11692	7.7329
	Historical	1977	Dry	9.60871	9.3081	8.86207	9.7541	8.06338	8.32359	8.01258	8.63461	5.84788	6.24059	5.46206	7.0191	7.93791	7.84123	7.4082	8.27426	7.32284	7.24672	6.9413	7.55214
	Historical	1978	Dry	9.58436	9.3093	8.86353	9.755	8.25796	8.01766	7.70735	8.32797	6.06735	6.34759	5.57207	7.1231	8.0913	7.86666	7.4357	8.29761	7.22438	7.21518	6.91188	7.51849
	Historical	1979	Dry	9.54047	9.4644	9.01884	9.91	8.26246	8.13094	7.82078	8.4411	6.23043	6.6178	5.84438	7.3912	7.91578	7.85325	7.42248	8.28401	7.2544	7.16945	6.86794	7.47096
	Historical	1980	Dry	9.4966	9.5788	9.13333	10.0243	8.26695	8.32554	8.01584	8.63524	6.39356	6.66892	5.89701	7.4408	7.9256	7.77535	7.34476	8.20594	7.26877	7.39214	7.09217	7.69211
	Historical	1981	Dry	9.45274	9.3332	8.88784	9.7786	8.27145	8.21435	7.90475	8.52395	6.55673	6.42468	5.65388	7.1955	7.87104	7.82075	7.39163	8.24987	7.16063	7.19331	6.89468	7.49195
	Historical	1982	Dry	9.40892	9.5262	9.08088	9.9716	8.27594	8.30497	7.99569	8.61425	6.71995	6.28852	5.51854	7.0585	7.6493	7.73041	7.30195	8.15888	7.08567	6.9952	6.69773	7.29267
	Historical	1983	Dry	9.36512	9.3571	8.9118	9.8025	8.28045	8.29521	7.98601	8.60441	6.88319	6.8065	6.03715	7.5759	7.86669	7.72952	7.30118	8.15786	7.16974	7.25232	6.9559	7.54875
	Historical	1984	Dry	9.32136	9.4057	8.96038	9.851	8.28496	8.38851	8.07954	8.69748	7.04646	7.15432	6.38545	7.9232	7.58696	7.59681	7.16861	8.02501	7.04458	7.10948	6.81398	7.40498
	Historical	1985	Dry	9.27764	9.3661	8.92078	9.8114	8.28949	8.41822	8.10931	8.72713	7.20976	7.55534	6.78682	8.3238	7.64494	7.58082	7.15351	8.00814	7.0327	7.02043	6.72576	7.3151
	Historical	1986	Dry	9.37991	9.3722	8.92687	9.8174	8.36591	8.39323	8.08451	8.70196	7.28345	7.50924	6.741	8.2775	7.33943	7.20614	6.77906	7.63322	7.01181	6.91925	6.62533	7.21317
	Historical	1987	Dry	8.9114	8.8739	8.42865	9.3192	8.37402	8.27383	7.96515	8.58251	7.95718	7.66068	6.89265	8.4287	7.54771	7.28782	6.86083	7.71482	7.03527	6.89553	6.60229	7.18878
	Historical	1988	Dry	9.04798	8.9006	8.45529	9.3458	8.30416	8.17887	7.87033	8.48741	7.45356	7.32418	6.5563	8.0921	7.03384	7.20377	6.77693	7.63061	6.94466	6.93319	6.64056	7.22582
	Historical	1989	Dry	9.12184	9.2369	8.79165	9.6822	8.10591	8.1692	7.8607	8.4777	6.75693	7.09034	6.32256	7.8581	7.21969	7.10471	6.67844	7.53098	6.62936	6.82063	6.52856	7.1127
	Historical	1990	Dry	8.91463	8.8465	8.40126	9.2918	8.23986	8.36587	8.05749	8.67426	7.6039	7.30104	6.53333	8.0687	7.32055	7.38442	6.95824	7.81061	6.40026	6.50802	6.21645	6.79958
	Historical	1991	Dry	8.86954	8.9436	8.4983	9.3889	8.00437	8.19899	7.89064	8.50734	7.7907	7.24183	6.47417	8.0095	7.092	7.28332	6.85718	7.70945	6.74993	6.68636	6.39526	6.97746
	Historical	1992	Dry	8.88086	8.8919	8.4466	9.3372	7.84031	8.11814	7.80989	8.4264	7.27656	7.7088	6.94116	8.4764	7.15929	7.08144	6.65548	7.5074	6.72743	6.92691	6.63623	7.2176
	Historical	1993	Dry	8.33759	8.6123	8.16706	9.0576	8.06934	7.90386	7.59563	8.21209	7.83003	7.49482	6.72719	8.2624	6.97728	7.02015	6.59455	7.44575	6.54679	6.45645	6.16615	6.74676
	Historical	1994	Dry	9.17409	8.9356	8.49035	9.3809	7.80221	7.92218	7.61403	8.23033	7.31986	7.25388	6.48626	8.0215	6.72623	7.02242	6.59685	7.44798	6.59987	6.55721	6.26725	6.84718
	Historical	1995	Dry	8.59026	8.5876	8.14236	9.0329	7.90581	8.07549	7.76736	8.38361	7.58832	7.50575	6.73812	8.2734	7.35692	7.14171	6.71618	7.56724	7.56476	7.20609	6.91644	7.49575
	Historical	1996	Dry	8.29355	8.8878	8.4425	9.333	7.75791	7.90544	7.59738	8.2135	7.41698	6.87453	6.10691	7.6421	7.26753	7.12891	6.70356	7.55426	7.41878	7.46817	7.17878	7.75755
	Historical	1997	Dry	8.63923	8.6489	8.20367	9.0942	8.39773	8.13832	7.83028	8.44636	8.05738	7.77477	7.00716	8.5424	7.37337	7.25354	6.82842	7.67867	7.32515	7.12531	6.83617	7.41445
	Historical	1998	Dry	8.86432	8.8922	8.44692	9.3375	7.95928	8.07307	7.76509	8.38105	7.84971	7.70317	6.93557	8.4708	6.93342	7.13855	6.71344	7.56366	7.19444	7.12784	6.83891	7.41676
	Historical	1999	Dry	9.69332	9.251	8.80572	9.6962	8.49167	8.25487	7.94691	8.56284	8.11552	7.5755	6.80793	8.3431	7.57302	7.41895	6.99387	7.84403	7.40306	7.66317	7.37443	7.95191
	Historical	2000	Dry	9.42052	9.3495	8.90422	9.7947	8.6063	8.43622	8.12831	8.74413	7.48381	7.579	6.81146	8.3465	7.34084	7.15386	6.72896	7.57876	6.92067	6.90271	6.61412	7.19129
	Historical	2001	Dry	9.50651	9.5489	9.10365	9.9942	8.45212	8.29167	7.98378	8.59957	7.11151	7.48444	6.71695	8.2519	6.92166	7.02911	6.60434	7.45389	6.77422	6.83604	6.54759	7.1245
	Historical	2002	Dry	9.19421	9.3487	8.90348	9.794	8.23959	8.25126	7.94341	8.55911	7.08003	7.62675	6.8593	8.3942	7.08339	7.18866	6.7639	7.61342	5.79606	6.15419	5.86584	6.44254
	Historical	2003	Dry	9.29725	9.4392	8.994	9.8845	8.20713	8.28917	7.98133	8.597	7.74716	8.24669	7.47929	9.0141	6.58893	7.18507	6.76033	7.6098	6.14419	6.17217	5.8839	6.46043
	Historical	2004	Dry	8.68677	9.41	8.96476	9.8553	8.16905	8.13101	7.82322	8.43881	8.14352	8.30778	7.54043	9.0751	6.79906	6.93795	6.51339	7.36251	6.85751	6.79966	6.51147	7.08786
	Historical	2005	Dry	9.11844	8.9791	8.53383	9.4243	8.53915	8.46677	8.15899	8.77455	7.82883	7.7383	6.971	8.5056	7.03615	6.9419	6.5174	7.3664	6.2804	6.485	6.19685	6.77314
	Historical	2006	Dry	8.45297	8.7218	8.27658	9.1671	8.23933	8.38131	8.07356	8.68906	7.62364	7.52397	6.75671	8.2912	6.67708	7.05503	6.63055	7.47951	6.04501	6.33653	6.04842	6.62464
	Historical	2007	Dry	9.28089	9.0604	8.61519	9.5057	8.47199	8.21561	7.90787	8.52335	7.46279	7.52393	6.7567	8.2912	7.36391	6.68617	6.26172	7.11062	6.32436	5.98272	5.69463	6.2708
	Historical	2008	Dry	9.2617	9.2289	8.7837	9.6742	8.60995	8.71211	8.4044	9.01982	8.05007	7.89076	7.12356	8.658	6.64769	6.78126	6.35696	7.20557	6.18002	6.13854	5.85047	6.42661
	Historical	2009	Dry	9.09628	9.0502	8.60495	9.4954	8.87933	8.67212	8.36442	8.97982	7.65776	7.74787	6.9807	8.515	6.85224	6.97966	6.55539	7.40393	6.3081	6.29136	6.0033	6.57941
	Historical	2010	Dry	9.23367	9.195	8.74973	9.6402	8.47991	8.7996	8.49193	9.10726	7.80507	7.81333	7.04618	8.5805	5.83773	6.17252	5.74826	6.59678	6.47851	6.47248	6.18443	6.76053
	Historical	2011	Dry	8.80837	9.3949	8.94963	9.8401	8.28375	8.40566	8.09801	8.71332	8.58914	7.90124	7.1341	8.6684	6.6733	6.40324	5.97902	6.82745	5.78996	5.85823	5.57019	6.14627
	Historical	2012	Dry	9.09403	8.9276	8.48238	9.3729	8.08825	8.37599	8.06836	8.68362	7.69348	8.30755	7.54042	9.0747	7.02108	6.89136	6.46726	7.31546	5.72685	5.75105	5.46302	6.03908
	RCP 4.5	2013	Dry	.	8.7269	8.28162	9.1721	.	8.29526	7.98836	8.60216	.	7.68517	6.91858	8.4518	.	5.93018	5.52351	6.33684	.	5.43052	5.17468	5.68637
	RCP 4.5	2014	Dry	.	8.3944	7.91994	8.8688	.	8.33965	8.0145	8.66479	.	8.37547	7.57235	9.1786	.	6.36211	5.94065	6.78358	.	6.13069	5.79474	6.46664
	RCP 4.5	2015	Dry	.	8.1393	7.58895	8.6896	.	8.1306	7.78784	8.47336	.	8.03026	7.2131	8.8474	.	6.56134	6.13871	6.98398	.	6.4285	5.98765	6.86936
	RCP 4.5	2016	Dry	.	7.9325	7.34122	8.5237	.	8.12794	7.77903	8.47685	.	8.22878	7.40885	9.0487	.	5.79229	5.35545	6.22913	.	6.39742	5.80321	6.99163
	RCP 4.5	2017	Dry	.	8.173	7.51575	8.8303	.	8.13403	7.7841	8.48396	.	8.05737	7.21161	8.9031	.	6.31343	5.87173	6.75513	.	6.32839	5.69001	6.96677
	RCP 4.5	2018	Dry	.	8.5576	7.81685	9.2984	.	8.26972	7.91708	8.62235	.	7.94822	7.06477	8.8317	.	6.70654	6.25891	7.15416	.	6.8393	6.19761	7.481
	RCP 4.5	2019	Dry	.	9.1707	8.35791	9.9835	.	8.44343	8.0892	8.79765	.	7.7729	6.86307	8.6827	.	6.18234	5.73298	6.63169	.	6.7293	6.07884	7.37975
	RCP 4.5	2020	Dry	.	9.5906	8.72626	10.4549	.	8.46064	8.10543	8.81585	.	7.75693	6.83331	8.6805	.	6.77024	6.31247	7.22802	.	6.55984	5.88952	7.23017
	RCP 4.5	2021	Dry	.	10.0196	9.12429	10.9149	.	8.41392	8.05748	8.77036	.	7.54558	6.61559	8.4756	.	6.79642	6.33213	7.26071	.	6.12016	5.44278	6.79754
	RCP 4.5	2022	Dry	.	10.1826	9.27387	11.0914	.	8.40571	8.04841	8.76301	.	7.76294	6.82966	8.6962	.	6.38756	5.92298	6.85214	.	6.214	5.53619	6.89181
	RCP 4.5	2023	Dry	.	9.9774	9.06588	10.8888	.	8.32156	7.9634	8.67972	.	7.87638	6.94108	8.8117	.	6.81495	6.34159	7.28831	.	6.14096	5.46182	6.8201
	RCP 4.5	2024	Dry	.	9.8075	8.89548	10.7194	.	8.25898	7.89998	8.61798	.	7.94411	7.00737	8.8808	.	6.65842	6.18069	7.13616	.	6.33135	5.64889	7.01381
	RCP 4.5	2025	Dry	.	9.4266	8.5088	10.3444	.	8.19241	7.83273	8.55209	.	8.04986	7.11208	8.9877	.	6.26637	5.7883	6.74444	.	6.55657	5.87279	7.24036
	RCP 4.5	2026	Dry	.	8.9487	8.01609	9.8814	.	8.15137	7.79099	8.51174	.	7.88168	6.94316	8.8202	.	6.67305	6.18835	7.15774	.	6.72021	6.03632	7.4041
	RCP 4.5	2027	Dry	.	8.6519	7.69611	9.6076	.	8.17968	7.81867	8.54069	.	7.92619	6.98719	8.8652	.	6.503	6.01613	6.98987	.	6.69184	6.00769	7.37599
	RCP 4.5	2028	Dry	.	8.4977	7.51484	9.4806	.	8.05521	7.69364	8.41679	.	7.9226	6.98328	8.8619	.	6.35164	5.86444	6.83883	.	6.85186	6.16712	7.5366
	RCP 4.5	2029	Dry	.	8.8222	7.81362	9.8308	.	8.10275	7.74063	8.46487	.	7.5043	6.56478	8.4438	.	6.76948	6.27815	7.2608	.	7.14124	6.45623	7.82625
	RCP 4.5	2030	Dry	.	8.806	7.77738	9.8347	.	8.28902	7.9264	8.65165	.	7.33843	6.39878	8.2781	.	6.78564	6.29348	7.2778	.	6.95714	6.2721	7.64219
	RCP 4.5	2031	Dry	.	9.1841	8.143	10.2252	.	8.38182	8.01873	8.74491	.	7.19679	6.25705	8.1365	.	6.9334	6.44101	7.4258	.	6.55056	5.86546	7.23567
	RCP 4.5	2032	Dry	.	9.2733	8.22664	10.3199	.	8.55251	8.18899	8.91604	.	7.90693	6.96715	8.8467	.	7.25208	6.75743	7.74673	.	6.65466	5.96945	7.33987
	RCP 4.5	2033	Dry	.	9.6283	8.58061	10.6761	.	8.43897	8.07504	8.8029	.	7.93055	6.99073	8.8704	.	6.76262	6.26773	7.2575	.	6.23847	5.55319	6.92374
	RCP 4.5	2034	Dry	.	9.7081	8.6602	10.7561	.	8.47899	8.11468	8.84329	.	8.48207	7.54222	9.4219	.	6.897	6.40197	7.39203	.	6.45957	5.77429	7.14486
	RCP 4.5	2035	Dry	.	9.9152	8.86495	10.9655	.	8.26981	7.90515	8.63446	.	8.12561	7.18574	9.0655	.	6.84245	6.34631	7.3386	.	6.06547	5.38017	6.75076
	RCP 4.5	2036	Dry	.	9.9516	8.89535	11.0079	.	8.39549	8.03051	8.76047	.	7.93732	6.99745	8.8772	.	6.677	6.1808	7.17319	.	6.29619	5.61087	6.98151
	RCP 4.5	2037	Dry	.	10.0971	9.03126	11.163	.	8.35436	7.98908	8.71964	.	7.71919	6.77931	8.6591	.	6.7936	6.29732	7.28988	.	5.99413	5.3088	6.67946
	RCP 4.5	2038	Dry	.	9.9286	8.85134	11.0059	.	8.42457	8.059	8.79013	.	7.94588	7.00599	8.8858	.	6.99772	6.50094	7.49451	.	6.13966	5.45433	6.825
	RCP 4.5	2039	Dry	.	9.8478	8.75941	10.9361	.	8.38711	8.02128	8.75293	.	8.04155	7.10166	8.9814	.	6.76102	6.26421	7.25783	.	5.97034	5.28501	6.65568
	RCP 4.5	2040	Dry	.	9.6212	8.52404	10.7183	.	8.4252	8.05914	8.79127	.	8.1905	7.25061	9.1304	.	6.70347	6.20661	7.20032	.	6.33153	5.64619	7.01688
	RCP 4.5	2041	Dry	.	8.9744	7.87175	10.0771	.	8.34542	7.97913	8.71171	.	8.00898	7.06909	8.9489	.	6.68014	6.18307	7.17721	.	6.22605	5.54071	6.9114
	RCP 4.5	2042	Dry	.	8.5821	7.47696	9.6872	.	8.3166	7.95009	8.6831	.	7.89957	6.95967	8.8395	.	6.48879	5.99169	6.98589	.	6.35883	5.67349	7.04418
	RCP 4.5	2043	Dry	.	8.1415	7.03583	9.2471	.	8.19614	7.82944	8.56285	.	8.15183	7.21193	9.0917	.	6.44741	5.95027	6.94454	.	6.33443	5.64908	7.01977
	RCP 4.5	2044	Dry	.	7.9797	6.87396	9.0854	.	8.20574	7.83885	8.57262	.	7.96279	7.0229	8.9027	.	6.53403	6.03682	7.03125	.	6.66834	5.98299	7.35368
	RCP 4.5	2045	Dry	.	7.9671	6.86043	9.0739	.	8.30687	7.93982	8.67393	.	7.99781	7.05792	8.9377	.	6.44815	5.9509	6.94541	.	6.75568	6.07033	7.44103
	RCP 4.5	2046	Dry	.	8.1013	6.99194	9.2107	.	8.30596	7.93875	8.67317	.	7.9818	7.04191	8.9217	.	6.52687	6.0296	7.02414	.	6.57175	5.8864	7.25709
	RCP 4.5	2047	Dry	.	8.8107	7.69712	9.9244	.	8.30414	7.93678	8.6715	.	7.93213	6.99223	8.872	.	6.71776	6.22046	7.21506	.	6.60596	5.92061	7.29131
	RCP 4.5	2048	Dry	.	9.4944	8.37566	10.6132	.	8.45554	8.08804	8.82303	.	7.99736	7.05746	8.9372	.	6.67791	6.18058	7.17525	.	6.51983	5.83448	7.20518
	RCP 4.5	2049	Dry	.	9.997	8.87323	11.1207	.	8.56416	8.19654	8.93179	.	7.85751	6.91762	8.7974	.	6.89256	6.39521	7.3899	.	6.12551	5.44017	6.81086
	RCP 4.5	2050	Dry	.	10.6903	9.56258	11.8181	.	8.61011	8.24237	8.97786	.	7.95969	7.01979	8.8996	.	6.97465	6.47729	7.47201	.	5.96153	5.27618	6.64688
	RCP 4.5	2051	Dry	.	10.8659	9.73568	11.9962	.	8.55731	8.18946	8.92517	.	8.18009	7.2402	9.12	.	6.77155	6.27417	7.26894	.	5.94487	5.25952	6.63022
	RCP 4.5	2052	Dry	.	10.6662	9.53479	11.7976	.	8.53005	8.16209	8.898	.	8.0254	7.08551	8.9653	.	6.77501	6.27762	7.2724	.	5.77247	5.08712	6.45782
	RCP 4.5	2053	Dry	.	10.4863	9.35468	11.618	.	8.40931	8.04125	8.77736	.	8.38193	7.44204	9.3218	.	6.61537	6.11798	7.11277	.	5.55669	4.87135	6.24204
	RCP 4.5	2054	Dry	.	10.2358	9.10409	11.3675	.	8.23459	7.86644	8.60273	.	8.69127	7.75138	9.6312	.	6.45914	5.96173	6.95655	.	5.81754	5.13219	6.50289
	RCP 4.5	2055	Dry	.	9.9574	8.82522	11.0895	.	8.2441	7.87588	8.61232	.	8.23654	7.29664	9.1764	.	6.58952	6.0921	7.08694	.	6.35716	5.67182	7.04251
	RCP 4.5	2056	Dry	.	9.3212	8.18787	10.4546	.	8.45046	8.08216	8.81876	.	7.86058	6.92069	8.8005	.	6.523	6.02558	7.02042	.	6.45163	5.76628	7.13697
	RCP 4.5	2057	Dry	.	8.5389	7.40365	9.6742	.	8.40338	8.035	8.77175	.	7.72417	6.78427	8.6641	.	6.45199	5.95456	6.94942	.	6.11137	5.42602	6.79672
	RCP 4.5	2058	Dry	.	7.9474	6.80976	9.085	.	8.24565	7.87721	8.61409	.	7.99602	7.05612	8.9359	.	6.53123	6.0338	7.02866	.	6.29734	5.612	6.98269
	RCP 4.5	2059	Dry	.	7.6021	6.46215	8.742	.	8.08358	7.71508	8.45209	.	8.1799	7.24	9.1198	.	6.2716	5.77416	6.76903	.	6.66056	5.97521	7.3459
	RCP 4.5	2060	Dry	.	7.18	6.03821	8.3218	.	8.10343	7.73486	8.47199	.	8.02472	7.08482	8.9646	.	6.28616	5.78872	6.7836	.	6.8197	6.13436	7.50505
	RCP 4.5	2061	Dry	.	7.1688	6.0259	8.3118	.	8.07719	7.70858	8.44581	.	7.59604	6.65614	8.5359	.	6.49759	6.00015	6.99503	.	6.80027	6.11492	7.48562
	RCP 4.5	2062	Dry	.	7.7657	6.6222	8.9092	.	8.11693	7.74826	8.48559	.	7.37525	6.43535	8.3151	.	6.51679	6.01935	7.01424	.	7.1395	6.45415	7.82484
	RCP 4.5	2063	Dry	.	7.8269	6.68328	8.9705	.	8.35437	7.98566	8.72308	.	7.43984	6.49995	8.3797	.	6.86315	6.3657	7.3606	.	7.14061	6.45526	7.82596
	RCP 4.5	2064	Dry	.	8.4435	7.29991	9.5871	.	8.44936	8.0806	8.81812	.	7.34257	6.40267	8.2825	.	6.88691	6.38946	7.38435	.	6.56978	5.88444	7.25513
	RCP 4.5	2065	Dry	.	8.7942	7.6504	9.938	.	8.41248	8.04369	8.78128	.	8.26475	7.32485	9.2046	.	6.78668	6.28923	7.28413	.	6.79541	6.11006	7.48076
	RCP 4.5	2066	Dry	.	9.7096	8.56521	10.854	.	8.20216	7.83333	8.571	.	7.75532	6.81543	8.6952	.	6.66168	6.16423	7.15913	.	6.90742	6.22207	7.59277
	RCP 4.5	2067	Dry	.	9.5745	8.42925	10.7198	.	8.52998	8.16111	8.89885	.	7.99589	7.056	8.9358	.	6.89981	6.40236	7.39726	.	6.99194	6.30659	7.67729
	RCP 4.5	2068	Dry	.	9.8848	8.7385	11.0312	.	8.34183	7.97293	8.71073	.	7.63786	6.69797	8.5778	.	6.64383	6.14638	7.14128	.	6.02406	5.33872	6.70941
	RCP 4.5	2069	Dry	.	10.2509	9.10346	11.3983	.	8.32353	7.95459	8.69246	.	8.34257	7.40267	9.2825	.	6.7722	6.27475	7.26965	.	6.72133	6.03598	7.40668
	RCP 4.5	2070	Dry	.	10.3084	9.16013	11.4567	.	8.16709	7.79813	8.53605	.	8.00922	7.06933	8.9491	.	6.65856	6.16111	7.15602	.	6.72792	6.04258	7.41327
	RCP 4.5	2071	Dry	.	10.3319	9.18304	11.4807	.	8.27637	7.90738	8.64535	.	7.62892	6.68903	8.5688	.	6.72221	6.22475	7.21966	.	6.77297	6.08762	7.45832
	RCP 4.5	2072	Dry	.	10.1779	9.02886	11.327	.	8.26667	7.89766	8.63568	.	7.85337	6.91347	8.7933	.	6.88127	6.38382	7.37872	.	6.29163	5.60629	6.97698
	RCP 4.5	2073	Dry	.	10.1431	8.99395	11.2922	.	8.2258	7.85676	8.59483	.	7.74495	6.80506	8.6848	.	6.89726	6.39981	7.39472	.	6.57722	5.89188	7.26257
	RCP 4.5	2074	Dry	.	9.7287	8.57956	10.8778	.	8.28265	7.91359	8.6517	.	7.83308	6.89318	8.773	.	6.87665	6.37919	7.3741	.	6.72936	6.04401	7.41471
	RCP 4.5	2075	Dry	.	9.274	8.12471	10.4232	.	8.13047	7.76139	8.49954	.	7.62096	6.68106	8.5609	.	6.88876	6.3913	7.38621	.	6.71486	6.02951	7.40021
	RCP 4.5	2076	Dry	.	8.828	7.67855	9.9775	.	8.11718	7.74808	8.48627	.	7.60529	6.6654	8.5452	.	6.85547	6.35801	7.35292	.	6.67963	5.99428	7.36498
	RCP 4.5	2077	Dry	.	8.1515	7.00157	9.3014	.	8.07081	7.7017	8.43992	.	7.58576	6.64587	8.5257	.	6.83498	6.33752	7.33243	.	6.69675	6.0114	7.3821
	RCP 4.5	2078	Dry	.	7.9572	6.8068	9.1076	.	8.01026	7.64113	8.37939	.	7.53865	6.59876	8.4785	.	6.93913	6.44168	7.43658	.	7.00237	6.31702	7.68772
	RCP 4.5	2079	Dry	.	7.7289	6.57796	8.8798	.	8.0664	7.69725	8.43554	.	7.79626	6.85637	8.7362	.	6.90966	6.4122	7.40711	.	7.20877	6.52342	7.89412
	RCP 4.5	2080	Dry	.	7.7996	6.64826	8.9509	.	8.06622	7.69707	8.43538	.	7.43544	6.49554	8.3753	.	6.90858	6.41113	7.40604	.	7.0276	6.34226	7.71295
	RCP 4.5	2081	Dry	.	8.4075	7.25597	9.5591	.	8.18926	7.82009	8.55843	.	7.48531	6.54541	8.4252	.	7.14355	6.6461	7.64101	.	7.15781	6.47247	7.84316
	RCP 4.5	2082	Dry	.	8.5733	7.42165	9.725	.	8.35699	7.98781	8.72617	.	7.6545	6.71461	8.5944	.	7.23386	6.73641	7.73132	.	7.06767	6.38232	7.75302
	RCP 4.5	2083	Dry	.	9.0102	7.85851	10.1619	.	8.4366	8.06741	8.8058	.	7.38376	6.44386	8.3237	.	7.17002	6.67257	7.66748	.	6.66108	5.97573	7.34643
	RCP 4.5	2084	Dry	.	9.3769	8.22521	10.5286	.	8.41851	8.04931	8.78771	.	7.97921	7.03931	8.9191	.	7.09991	6.60245	7.59736	.	6.59512	5.90978	7.28047
	RCP 4.5	2085	Dry	.	9.6005	8.44877	10.7523	.	8.13937	7.77015	8.50858	.	7.86434	6.92445	8.8042	.	6.93176	6.43431	7.42922	.	6.4854	5.80005	7.17074
	RCP 4.5	2086	Dry	.	9.7402	8.58837	10.8921	.	8.1877	7.81848	8.55692	.	7.66254	6.72264	8.6024	.	6.98068	6.48322	7.47813	.	6.6274	5.94205	7.31275
	RCP 4.5	2087	Dry	.	9.7858	8.63373	10.9379	.	8.17787	7.80864	8.5471	.	7.71065	6.77076	8.6505	.	6.91714	6.41968	7.41459	.	6.44072	5.75537	7.12607
	RCP 4.5	2088	Dry	.	9.6469	8.49457	10.7992	.	8.19132	7.82208	8.56056	.	7.77593	6.83603	8.7158	.	6.94967	6.45221	7.44712	.	6.5434	5.85805	7.22875
	RCP 4.5	2089	Dry	.	9.6639	8.51134	10.8164	.	8.10058	7.73134	8.46983	.	7.76424	6.82435	8.7041	.	6.92549	6.42803	7.42295	.	6.67836	5.99301	7.36371
	RCP 4.5	2090	Dry	.	9.4885	8.33576	10.6412	.	8.0663	7.69705	8.43555	.	7.81505	6.87515	8.7549	.	6.85119	6.35373	7.34864	.	7.0234	6.33805	7.70874
	RCP 4.5	2091	Dry	.	9.3883	8.23549	10.5412	.	8.03081	7.66155	8.40006	.	7.32343	6.38354	8.2633	.	6.81243	6.31498	7.30989	.	6.76038	6.07503	7.44573
	RCP 4.5	2092	Dry	.	9.0646	7.91171	10.2175	.	8.19048	7.82122	8.55975	.	7.44216	6.50226	8.3821	.	7.05692	6.55947	7.55438	.	6.87273	6.18738	7.55808
	RCP 4.5	2093	Dry	.	9.0701	7.91722	10.223	.	8.10811	7.73884	8.47738	.	7.41724	6.47734	8.3571	.	6.95079	6.45334	7.44825	.	6.79932	6.11397	7.48467
	RCP 4.5	2094	Dry	.	8.9185	7.76558	10.0714	.	8.23564	7.86637	8.60492	.	7.78381	6.84391	8.7237	.	7.01202	6.51456	7.50947	.	7.00788	6.32253	7.69323
	RCP 4.5	2095	Dry	.	8.9021	7.74912	10.055	.	8.18202	7.81274	8.5513	.	7.64732	6.70743	8.5872	.	6.9601	6.46264	7.45756	.	6.7715	6.08615	7.45685
	RCP 4.5	2096	Dry	.	8.7692	7.61626	9.9222	.	8.18713	7.81784	8.55641	.	7.63221	6.69231	8.5721	.	6.938	6.44054	7.43546	.	6.92882	6.24347	7.61416
	RCP 4.5	2097	Dry	.	8.8293	7.67624	9.9824	.	8.17282	7.80353	8.54211	.	7.44339	6.50349	8.3833	.	6.87459	6.37713	7.37204	.	6.70962	6.02427	7.39496
	RCP 4.5	2098	Dry	.	8.883	7.72983	10.0362	.	8.19383	7.82454	8.56312	.	7.50489	6.56499	8.4448	.	6.98251	6.48506	7.47997	.	6.72087	6.03552	7.40622
	RCP 4.5	2099	Dry	.	8.8676	7.71431	10.0209	.	8.24882	7.87953	8.61812	.	7.66145	6.72156	8.6013	.	7.07005	6.57259	7.5675	.	6.70059	6.01525	7.38594
	RCP 4.5	2100	Dry	.	9.0758	7.92242	10.2292	.	8.29003	7.92073	8.65933	.	7.65922	6.71933	8.5991	.	6.8664	6.36894	7.36385	.	6.71219	6.02684	7.39754
	Historical	1964	Wet	9.61066	.	.	.	8.52496	.	.	.	2.48491	.	.	.	7.33717	.	.	.	7.2547	.	.	.
	Historical	1965	Wet	9.33724	.	.	.	8.3299	.	.	.	2.19722	.	.	.	7.11477	.	.	.	7.14992	.	.	.
	Historical	1966	Wet	9.35083	.	.	.	8.29113	.	.	.	3.91909	.	.	.	7.46449	.	.	.	7.24542	.	.	.
	Historical	1967	Wet	9.46976	.	.	.	8.25733	.	.	.	3.73095	.	.	.	7.60212	.	.	.	7.26479	.	.	.
	Historical	1968	Wet	9.57623	.	.	.	8.02584	.	.	.	3.2581	.	.	.	7.74028	.	.	.	7.28427	.	.	.
	Historical	1969	Wet	9.57654	9.5762	8.68102	10.4714	8.22382	8.02584	7.4355	8.61618	4.24766	3.2581	2.55535	3.9608	7.8781	7.74028	7.28977	8.1908	7.30344	7.28427	6.75216	7.81638
	Historical	1970	Wet	9.64024	9.5718	9.00566	10.1378	8.10872	8.08124	7.63479	8.52768	4.76786	4.6756	4.01646	5.3347	8.03926	8.03831	7.58976	8.48686	7.37713	7.3301	6.91947	7.74074
	Historical	1971	Wet	9.67118	9.6253	9.08873	10.1619	8.59526	8.60244	8.21964	8.98523	5.09987	5.31418	4.73315	5.8952	8.24302	8.2819	7.84249	8.72131	6.93245	7.0853	6.68708	7.48351
	Historical	1972	Wet	9.59342	9.6113	9.09523	10.1273	8.22778	8.30061	7.99504	8.60618	6.02948	6.16321	5.588	6.7384	7.96572	7.87427	7.542	8.20654	7.3202	7.25214	6.89585	7.60843
	Historical	1973	Wet	9.52927	9.2106	8.75014	9.6711	8.26023	8.28796	7.98722	8.58871	6.81344	6.09793	5.525	6.6709	8.2089	8.1402	7.84643	8.43397	7.47136	7.20011	6.85029	7.54993
	Historical	1974	Wet	9.67859	9.733	9.32186	10.1442	8.25245	8.57934	8.29561	8.86307	6.36475	6.51741	5.94928	7.0855	8.23748	8.18476	7.91858	8.45094	7.2145	7.16957	6.82131	7.51783
	Historical	1975	Wet	9.47665	9.4808	9.10544	9.8562	8.36341	8.46146	8.17939	8.74353	6.79681	7.31089	6.74852	7.8733	8.14176	8.34131	8.07801	8.60461	7.39386	7.35871	7.01194	7.70548
	Historical	1976	Wet	9.21632	9.1061	8.75452	9.4577	8.57678	8.31274	8.03818	8.58729	7.3192	6.94909	6.39234	7.5058	8.13388	8.25055	7.98995	8.51115	7.76089	7.50952	7.16395	7.8551
	Historical	1977	Wet	9.22365	9.1774	8.84238	9.5124	8.72794	8.43755	8.16383	8.71127	6.86797	7.09171	6.54006	7.6434	7.93916	7.87898	7.62632	8.13164	7.15383	7.44473	7.10007	7.78939
	Historical	1978	Wet	9.36413	9.1887	8.86562	9.5117	8.28664	8.26938	7.99989	8.53887	7.06604	7.40134	6.85421	7.9485	8.01611	7.92373	7.67513	8.17232	7.2445	7.34021	6.99631	7.68411
	Historical	1979	Wet	9.48852	9.5011	9.18708	9.8151	8.34681	8.29054	8.02156	8.55953	7.18349	7.31165	6.76851	7.8548	7.90431	7.86305	7.61604	8.11006	7.22871	7.42391	7.08066	7.76715
	Historical	1980	Wet	9.82287	9.8032	9.49619	10.1103	8.35679	8.50967	8.24341	8.77594	7.31255	7.44759	6.90798	7.9872	7.826	7.69109	7.44441	7.93776	7.19664	7.52948	7.18681	7.87216
	Historical	1981	Wet	9.50584	9.6422	9.3407	9.9437	8.29339	8.29371	8.02778	8.55964	7.36915	7.27823	6.74174	7.8147	7.7472	7.9387	7.69609	8.1813	7.16362	7.25569	6.91351	7.59787
	Historical	1982	Wet	9.43468	9.491	9.19398	9.7879	8.26346	8.19362	7.92959	8.45766	7.44629	7.31203	6.77832	7.8457	7.66711	7.6671	7.42539	7.90881	7.13086	7.13127	6.78954	7.47301
	Historical	1983	Wet	9.36352	9.2288	8.93561	9.5221	8.23353	8.03776	7.77396	8.30155	7.52343	7.37251	6.84129	7.9037	7.5904	7.68241	7.44173	7.92309	7.09933	6.99137	6.65004	7.33271
	Historical	1984	Wet	9.29236	9.3035	9.01345	9.5936	8.2036	8.15797	7.89557	8.42037	7.60058	7.68103	7.15204	8.21	7.50987	7.27321	7.03264	7.51378	7.06618	7.14512	6.80414	7.4861
	Historical	1985	Wet	9.2212	9.2579	8.97049	9.5453	8.17368	8.26726	8.00504	8.52948	7.67773	7.87456	7.34757	8.4016	7.43195	7.46881	7.23068	7.70693	7.03391	7.09717	6.75652	7.43783
	Historical	1986	Wet	9.15005	9.1683	8.88319	9.4534	8.14375	8.17511	7.91396	8.43626	7.75489	7.68906	7.16385	8.2143	7.35122	7.34165	7.10368	7.57963	7.00156	7.0045	6.66414	7.34486
	Historical	1987	Wet	9.10631	9.0068	8.72377	9.2899	8.04815	8.07605	7.81504	8.33706	7.90655	7.66422	7.14059	8.1878	7.27446	7.28704	7.04971	7.52437	6.96924	6.96982	6.62973	7.30991
	Historical	1988	Wet	8.74926	8.7081	8.42681	8.9894	7.9413	8.04079	7.78063	8.30095	7.66856	7.97516	7.45292	8.4974	7.19478	7.16186	6.92476	7.39896	6.89972	6.9775	6.63766	7.31735
	Historical	1989	Wet	8.90572	8.9932	8.71341	9.2729	7.87967	7.90567	7.64562	8.16572	7.95578	8.1136	7.59257	8.6346	6.79234	6.90202	6.66639	7.13764	6.89366	6.9016	6.56197	7.24122
	Historical	1990	Wet	9.32563	9.3749	9.09648	9.6533	8.37355	8.36477	8.10541	8.62414	7.98854	7.81376	7.29374	8.3338	7.51043	7.43743	7.20183	7.67303	6.95081	6.72732	6.3879	7.06673
	Historical	1991	Wet	9.13292	9.3465	9.06926	9.6236	8.10621	8.16609	7.90682	8.42536	8.13329	7.925	7.40581	8.4442	7.10414	7.36535	7.1301	7.6006	6.83303	6.88002	6.5408	7.21925
	Historical	1992	Wet	9.26946	9.1812	8.90502	9.4573	8.3395	8.16437	7.90566	8.42307	8.63213	8.38199	7.86348	8.9005	7.12125	7.20133	6.96645	7.4362	7.2349	7.08056	6.74151	7.41962
	Historical	1993	Wet	8.67386	8.7238	8.44856	8.999	8.08672	8.13004	7.87142	8.38867	7.74544	7.70722	7.18921	8.2252	6.88141	7.13867	6.90464	7.3727	6.70319	6.84998	6.51109	7.18888
	Historical	1994	Wet	8.87248	8.5916	8.31719	8.8661	8.11482	7.84239	7.58424	8.10054	8.1278	8.21593	7.69828	8.7336	7.05752	6.95219	6.71822	7.18617	7.00499	6.82364	6.48488	7.16239
	Historical	1995	Wet	8.68677	8.7546	8.48082	9.0284	8.15277	8.14282	7.88473	8.4009	8.22229	8.27206	7.75464	8.7895	6.88551	6.92412	6.6903	7.15793	7.02465	7.21623	6.87761	7.55485
	Historical	1996	Wet	8.78829	9.0755	8.80223	9.3488	7.88382	7.93658	7.6789	8.19426	8.32458	7.8199	7.30261	8.3372	7.30854	7.27222	7.03888	7.50556	7.22257	7.36113	7.02262	7.69963
	Historical	1997	Wet	9.11812	9.1259	8.85308	9.3988	7.92696	8.08401	7.82639	8.34163	8.31238	8.11636	7.59914	8.6336	7.60738	7.55165	7.31874	7.78457	7.30115	7.39944	7.06104	7.73784
	Historical	1998	Wet	8.42574	8.5462	8.27368	8.8187	7.62608	7.74664	7.48937	8.0039	7.77444	8.01723	7.50002	8.5344	7.27794	7.26299	7.03019	7.49578	7.11964	7.03108	6.69277	7.36939
	Historical	1999	Wet	9.46055	9.2166	8.94428	9.4889	8.56102	8.3522	8.09498	8.60942	9.14484	8.81876	8.30155	9.336	7.45876	7.5209	7.28816	7.75365	7.40184	7.32863	6.99039	7.66686
	Historical	2000	Wet	9.29072	9.2742	9.00207	9.5464	8.41804	8.28184	8.02493	8.53876	8.51899	8.43253	7.91533	8.9497	7.42476	7.28162	7.04937	7.51386	7.03527	6.8398	6.50164	7.17796
	Historical	2001	Wet	9.16681	9.1952	8.92309	9.4672	7.71423	7.94926	7.69239	8.20613	7.87626	8.32633	7.80917	8.8435	7.724	7.64837	7.41631	7.88043	6.67203	6.76551	6.4274	7.10361
	Historical	2002	Wet	9.04488	9.055	8.78296	9.327	8.28223	8.14958	7.89298	8.40618	8.17132	8.30292	7.78585	8.82	7.7003	7.57851	7.34659	7.81043	6.8742	6.5768	6.23874	6.91486
	Historical	2003	Wet	8.65277	8.7173	8.44527	8.9893	8.19091	8.41256	8.156	8.66913	8.04527	8.12925	7.6123	8.6462	7.51915	7.27639	7.04449	7.50829	6.68085	6.36368	6.02567	6.7017
	Historical	2004	Wet	8.46884	8.8906	8.6186	9.1627	8.00837	8.11967	7.86335	8.376	7.81238	7.84225	7.32548	8.359	7.15149	7.14909	6.91765	7.38053	6.57508	6.66694	6.32895	7.00492
	Historical	2005	Wet	8.86291	8.8155	8.54345	9.0875	8.57225	8.59611	8.33982	8.8524	7.48997	7.61446	7.0979	8.131	7.41818	7.3814	7.15002	7.61279	6.89366	6.6025	6.26454	6.94046
	Historical	2006	Wet	8.1274	8.1453	7.87325	8.4173	8.15622	8.14633	7.89025	8.40241	8.04141	8.01792	7.5016	8.5342	7.34601	7.3625	7.13125	7.59375	6.63988	6.47208	6.13413	6.81002
	Historical	2007	Wet	7.89133	7.9354	7.66344	8.2074	8.02093	8.13384	7.87779	8.38989	7.87246	7.67639	7.16033	8.1924	6.58893	6.78836	6.55715	7.01957	5.30827	5.8381	5.50017	6.17603
	Historical	2008	Wet	9.02714	8.9811	8.70911	9.2531	8.60227	8.53723	8.28137	8.79309	8.21338	8.19073	7.67495	8.7065	6.36819	6.62617	6.39533	6.857	6.41999	6.31033	5.9724	6.64825
	Historical	2009	Wet	9.39325	9.2497	8.97771	9.5216	8.537	8.48204	8.22621	8.73787	8.10289	8.23779	7.72228	8.7533	7.04925	7.00521	6.77438	7.23603	6.22654	6.22934	5.89142	6.56726
	Historical	2010	Wet	9.04853	9.026	8.75403	9.2979	8.63533	8.47115	8.21549	8.72681	8.00903	8.21028	7.69503	8.7255	6.49527	6.34108	6.11036	6.57181	6.31536	6.24009	5.90218	6.57801
	Historical	2011	Wet	8.53935	8.9613	8.68935	9.2332	8.22229	8.26287	8.00724	8.5185	8.9813	8.4583	7.94329	8.9733	6.27852	6.38108	6.15045	6.61172	5.8693	6.01023	5.67231	6.34814
	Historical	2012	Wet	9.30647	9.17	8.89807	9.4419	8.50573	8.33908	8.08361	8.59456	8.19146	8.52476	8.00995	9.0396	7.08506	6.93204	6.70167	7.1624	5.74939	5.93363	5.59572	6.27154
	RCP 4.5	2013	Wet	.	8.9201	8.6495	9.1907	.	8.23691	7.98519	8.48864	.	8.34067	7.83054	8.8508	.	5.54283	5.41515	5.67051	.	6.15401	5.89871	6.4093
	RCP 4.5	2014	Wet	.	8.6931	8.36172	9.0246	.	8.02985	7.77441	8.28529	.	8.26897	7.68754	8.8504	.	6.31292	6.08635	6.53949	.	6.56435	6.18173	6.94697
	RCP 4.5	2015	Wet	.	8.5292	8.09387	8.9644	.	7.81282	7.50251	8.12313	.	7.9925	7.3507	8.6343	.	6.56385	6.3314	6.7963	.	6.55308	6.09391	7.01225
	RCP 4.5	2016	Wet	.	8.7275	8.18572	9.2692	.	7.88656	7.54191	8.23121	.	8.02397	7.35911	8.6888	.	5.21662	4.89382	5.53942	.	6.75354	6.26033	7.24675
	RCP 4.5	2017	Wet	.	9.0421	8.46506	9.6191	.	7.91618	7.55512	8.27724	.	7.93382	7.25273	8.6149	.	6.01396	5.68102	6.34691	.	6.65504	6.15042	7.15966
	RCP 4.5	2018	Wet	.	9.72	9.13382	10.3061	.	8.07383	7.68747	8.4602	.	8.01923	7.33083	8.7076	.	6.42658	6.08728	6.76587	.	6.7214	6.20697	7.23583
	RCP 4.5	2019	Wet	.	10.108	9.52088	10.6951	.	8.22499	7.82179	8.62819	.	8.12726	7.4338	8.8207	.	5.7757	5.42195	6.12945	.	6.47938	5.95619	7.00256
	RCP 4.5	2020	Wet	.	10.2569	9.66715	10.8467	.	8.14009	7.72136	8.55881	.	8.30844	7.61199	9.0049	.	6.77601	6.40561	7.14642	.	6.46191	5.93456	6.98926
	RCP 4.5	2021	Wet	.	10.031	9.42809	10.6339	.	8.09244	7.65834	8.52654	.	8.26882	7.57023	8.9674	.	6.76928	6.39019	7.14836	.	6.24536	5.71682	6.77389
	RCP 4.5	2022	Wet	.	9.7703	9.14162	10.399	.	8.01843	7.57264	8.46421	.	8.3012	7.6012	9.0012	.	6.16436	5.7829	6.54582	.	6.31227	5.78259	6.84196
	RCP 4.5	2023	Wet	.	9.4306	8.76773	10.0935	.	7.96184	7.50434	8.41934	.	8.2439	7.54294	8.9449	.	6.78529	6.38486	7.18572	.	6.44167	5.91075	6.9726
	RCP 4.5	2024	Wet	.	8.9753	8.27673	9.6738	.	7.94438	7.47622	8.41254	.	8.17163	7.47005	8.8732	.	6.51156	6.10482	6.9183	.	6.68543	6.15393	7.21693
	RCP 4.5	2025	Wet	.	8.6856	7.95651	9.4147	.	7.79905	7.32179	8.2763	.	8.15227	7.45028	8.8543	.	5.81539	5.40773	6.22305	.	6.88461	6.35299	7.41623
	RCP 4.5	2026	Wet	.	8.441	7.6904	9.1916	.	7.8543	7.36824	8.34035	.	7.80924	7.10699	8.5115	.	6.5648	6.14217	6.98742	.	6.83091	6.29915	7.36267
	RCP 4.5	2027	Wet	.	8.5145	7.75208	9.2769	.	7.98855	7.49458	8.48252	.	7.9678	7.26538	8.6702	.	6.28136	5.85551	6.7072	.	7.1069	6.57495	7.63884
	RCP 4.5	2028	Wet	.	8.5317	7.76523	9.2982	.	7.92882	7.42771	8.42993	.	8.09986	7.39732	8.8024	.	5.93192	5.50529	6.35856	.	7.18337	6.65134	7.7154
	RCP 4.5	2029	Wet	.	8.7485	7.98162	9.5154	.	7.99822	7.4904	8.50605	.	7.95871	7.2561	8.6613	.	6.64611	6.20983	7.08238	.	6.83012	6.29808	7.36216
	RCP 4.5	2030	Wet	.	9.3993	8.63141	10.1671	.	8.06014	7.54622	8.57406	.	8.04095	7.33829	8.7436	.	6.41878	5.98128	6.85628	.	6.69597	6.16391	7.22802
	RCP 4.5	2031	Wet	.	9.5553	8.78276	10.3278	.	7.98861	7.46908	8.50813	.	8.01191	7.30922	8.7146	.	6.68105	6.24292	7.11919	.	6.39047	5.85839	6.92256
	RCP 4.5	2032	Wet	.	9.7057	8.92368	10.4876	.	8.03708	7.51234	8.56181	.	8.21016	7.50745	8.9129	.	7.31086	6.86731	7.75441	.	6.66453	6.13243	7.19662
	RCP 4.5	2033	Wet	.	9.3951	8.60005	10.1901	.	7.93886	7.40937	8.46836	.	7.89813	7.19541	8.6009	.	6.77221	6.32832	7.2161	.	6.35635	5.82425	6.88845
	RCP 4.5	2034	Wet	.	9.304	8.49486	10.1132	.	8.10019	7.56628	8.6341	.	8.40232	7.69959	9.105	.	7.01543	6.5711	7.45976	.	6.50273	5.97063	7.03483
	RCP 4.5	2035	Wet	.	9.1898	8.36814	10.0115	.	8.00079	7.4628	8.53878	.	8.18407	7.48133	8.8868	.	6.82971	6.38265	7.27678	.	6.21231	5.6802	6.74441
	RCP 4.5	2036	Wet	.	9.2884	8.45761	10.1191	.	8.22492	7.68317	8.76667	.	8.50843	7.80569	9.2112	.	6.58176	6.13461	7.02892	.	6.36049	5.82838	6.8926
	RCP 4.5	2037	Wet	.	9.0252	8.18941	9.861	.	8.04304	7.4978	8.58828	.	8.05903	7.35629	8.7618	.	6.94988	6.50245	7.39731	.	5.98712	5.45501	6.51923
	RCP 4.5	2038	Wet	.	9.0088	8.17127	9.8464	.	8.10594	7.55748	8.65441	.	8.43881	7.73607	9.1416	.	7.03008	6.58139	7.47877	.	6.247	5.71489	6.77911
	RCP 4.5	2039	Wet	.	8.6799	7.84218	9.5177	.	8.1081	7.55665	8.65956	.	8.24266	7.53991	8.9454	.	6.70918	6.26042	7.15794	.	6.17824	5.64613	6.71035
	RCP 4.5	2040	Wet	.	8.6313	7.79314	9.4694	.	8.04925	7.49504	8.60347	.	8.42365	7.7209	9.1264	.	6.67483	6.2259	7.12376	.	6.50411	5.972	7.03622
	RCP 4.5	2041	Wet	.	8.4176	7.57747	9.2577	.	7.96957	7.41279	8.52635	.	8.13015	7.4274	8.8329	.	6.58893	6.13948	7.03839	.	6.41672	5.88461	6.94883
	RCP 4.5	2042	Wet	.	8.2641	7.41993	9.1083	.	7.96345	7.40429	8.5226	.	8.1485	7.44576	8.8513	.	6.39409	5.94453	6.84364	.	6.57892	6.04681	7.11103
	RCP 4.5	2043	Wet	.	8.3422	7.49239	9.192	.	7.79742	7.23606	8.35878	.	8.1465	7.44375	8.8492	.	6.09848	5.64882	6.54814	.	6.76719	6.23508	7.2993
	RCP 4.5	2044	Wet	.	8.5331	7.67712	9.3892	.	7.90047	7.33707	8.46387	.	8.03664	7.33389	8.7394	.	6.19451	5.74464	6.64437	.	6.74274	6.21063	7.27485
	RCP 4.5	2045	Wet	.	9.0114	8.14981	9.873	.	7.97366	7.40836	8.53896	.	7.90898	7.20623	8.6117	.	6.1888	5.73883	6.63877	.	6.7504	6.21829	7.28251
	RCP 4.5	2046	Wet	.	9.3844	8.51869	10.25	.	7.99699	7.42993	8.56405	.	8.08869	7.38594	8.7914	.	6.26414	5.81411	6.71417	.	6.74884	6.21673	7.28095
	RCP 4.5	2047	Wet	.	9.6042	8.73625	10.4721	.	8.01223	7.44354	8.58092	.	8.10106	7.39831	8.8038	.	6.56287	6.11276	7.01298	.	6.46163	5.92952	6.99374
	RCP 4.5	2048	Wet	.	10.129	9.2602	10.9977	.	8.11392	7.54371	8.68413	.	8.2054	7.50265	8.9081	.	6.47029	6.02009	6.92048	.	6.20945	5.67734	6.74156
	RCP 4.5	2049	Wet	.	10.4016	9.53277	11.2705	.	8.25574	7.68412	8.82736	.	8.25571	7.55296	8.9585	.	6.87776	6.42753	7.32799	.	5.99438	5.46227	6.52649
	RCP 4.5	2050	Wet	.	10.2612	9.39213	11.1302	.	8.20085	7.62793	8.77378	.	8.5242	7.82145	9.2269	.	7.06907	6.61881	7.51933	.	5.99257	5.46047	6.52468
	RCP 4.5	2051	Wet	.	9.8803	9.01044	10.7502	.	8.03943	7.46529	8.61357	.	8.5077	7.80495	9.2104	.	6.71584	6.26552	7.16616	.	5.93499	5.40288	6.4671
	RCP 4.5	2052	Wet	.	9.3367	8.46501	10.2085	.	8.12227	7.547	8.69755	.	8.30956	7.60682	9.0123	.	6.95077	6.50042	7.40112	.	5.92153	5.38942	6.45364
	RCP 4.5	2053	Wet	.	8.6649	7.79063	9.5392	.	8.03682	7.46049	8.61314	.	8.26568	7.56293	8.9684	.	6.83483	6.38447	7.28519	.	6.12063	5.58852	6.65274
	RCP 4.5	2054	Wet	.	8.19	7.31289	9.0671	.	7.96872	7.39142	8.54602	.	8.45254	7.7498	9.1553	.	6.32313	5.87273	6.77352	.	6.30519	5.77308	6.8373
	RCP 4.5	2055	Wet	.	8.2021	7.3225	9.0818	.	8.08381	7.5056	8.66202	.	8.37659	7.67384	9.0793	.	6.2702	5.81978	6.72061	.	6.26191	5.7298	6.79402
	RCP 4.5	2056	Wet	.	8.4307	7.54914	9.3122	.	8.16798	7.58893	8.74704	.	8.27438	7.57163	8.9771	.	6.27169	5.82127	6.72211	.	6.3597	5.82759	6.89181
	RCP 4.5	2057	Wet	.	8.2232	7.34061	9.1058	.	7.97368	7.39385	8.55352	.	8.08552	7.38277	8.7883	.	6.35659	5.90615	6.80703	.	6.55523	6.02312	7.08734
	RCP 4.5	2058	Wet	.	7.8642	6.98128	8.7472	.	7.85975	7.27919	8.44032	.	8.2218	7.51906	8.9246	.	6.3997	5.94924	6.85015	.	6.87136	6.33925	7.40347
	RCP 4.5	2059	Wet	.	7.8495	6.96651	8.7325	.	7.80525	7.224	8.38649	.	8.00459	7.30184	8.7073	.	5.93729	5.48683	6.38776	.	6.88034	6.34823	7.41245
	RCP 4.5	2060	Wet	.	8.4654	7.58236	9.3485	.	8.00717	7.4253	8.58905	.	8.04037	7.33762	8.7431	.	5.91483	5.46436	6.3653	.	7.06409	6.53198	7.5962
	RCP 4.5	2061	Wet	.	8.9694	8.08596	9.8529	.	8.01607	7.43361	8.59853	.	8.01343	7.31068	8.7162	.	6.16812	5.71764	6.6186	.	7.09668	6.56457	7.62879
	RCP 4.5	2062	Wet	.	9.5122	8.62788	10.3965	.	7.78114	7.19814	8.36415	.	8.0511	7.34835	8.7538	.	5.93968	5.4892	6.39016	.	6.88859	6.35648	7.4207
	RCP 4.5	2063	Wet	.	10.2319	9.34644	11.1174	.	7.93975	7.35624	8.52327	.	7.86223	7.15948	8.565	.	6.44581	5.99532	6.8963	.	6.71472	6.18261	7.24683
	RCP 4.5	2064	Wet	.	10.5546	9.66779	11.4414	.	7.97207	7.38808	8.55605	.	7.81178	7.10904	8.5145	.	6.71488	6.26438	7.16537	.	6.76688	6.23477	7.29899
	RCP 4.5	2065	Wet	.	10.5247	9.63676	11.4127	.	7.80622	7.22179	8.39064	.	8.36148	7.65873	9.0642	.	6.43197	5.98147	6.88246	.	7.20082	6.66871	7.73293
	RCP 4.5	2066	Wet	.	10.2521	9.36326	11.1409	.	7.53874	6.95391	8.12358	.	7.78862	7.08587	8.4914	.	6.23241	5.78192	6.68291	.	6.48746	5.95535	7.01956
	RCP 4.5	2067	Wet	.	10.7792	9.88986	11.6685	.	7.93636	7.35114	8.52157	.	8.15969	7.45695	8.8624	.	6.48513	6.03463	6.93563	.	6.70498	6.17287	7.23709
	RCP 4.5	2068	Wet	.	10.379	9.4895	11.2685	.	7.72037	7.13479	8.30594	.	7.80793	7.10518	8.5107	.	6.32126	5.87076	6.77176	.	6.58674	6.05463	7.11885
	RCP 4.5	2069	Wet	.	9.9376	9.04805	10.8271	.	7.69207	7.10617	8.27797	.	8.38745	7.6847	9.0902	.	6.52149	6.07099	6.97199	.	7.06155	6.52944	7.59366
	RCP 4.5	2070	Wet	.	9.5384	8.64878	10.4279	.	7.65299	7.06678	8.2392	.	7.87767	7.17492	8.5804	.	6.26544	5.81493	6.71594	.	6.58099	6.04888	7.1131
	RCP 4.5	2071	Wet	.	9.5552	8.66545	10.445	.	7.86012	7.27362	8.44661	.	8.13128	7.42854	8.834	.	6.36976	5.91925	6.82026	.	6.63175	6.09964	7.16386
	RCP 4.5	2072	Wet	.	9.302	8.41188	10.1921	.	7.7355	7.14874	8.32226	.	8.15107	7.44832	8.8538	.	6.56563	6.11513	7.01614	.	6.68089	6.14878	7.213
	RCP 4.5	2073	Wet	.	8.8914	8.00069	9.782	.	7.74091	7.15391	8.32792	.	8.01937	7.31662	8.7221	.	6.74295	6.29244	7.19346	.	6.69428	6.16217	7.22639
	RCP 4.5	2074	Wet	.	8.7685	7.87721	9.6598	.	7.85274	7.26551	8.43998	.	8.2253	7.52255	8.9281	.	6.63757	6.18706	7.08808	.	6.86198	6.32987	7.39409
	RCP 4.5	2075	Wet	.	8.4039	7.51211	9.2958	.	7.67882	7.09136	8.26627	.	8.11661	7.41386	8.8194	.	6.65831	6.2078	7.10882	.	6.83717	6.30506	7.36928
	RCP 4.5	2076	Wet	.	8.2551	7.36287	9.1473	.	7.66807	7.08042	8.25572	.	8.0205	7.31775	8.7233	.	6.6941	6.24359	7.14461	.	6.938	6.40589	7.47011
	RCP 4.5	2077	Wet	.	8.2693	7.3768	9.1617	.	7.66082	7.07298	8.24866	.	7.94231	7.23956	8.6451	.	6.54341	6.0929	6.99393	.	7.11551	6.5834	7.64762
	RCP 4.5	2078	Wet	.	8.2755	7.38292	9.168	.	7.61806	7.03005	8.20607	.	7.8998	7.19705	8.6026	.	6.7054	6.25489	7.15591	.	7.1448	6.61269	7.67691
	RCP 4.5	2079	Wet	.	8.6541	7.76151	9.5466	.	7.67924	7.09106	8.26741	.	7.90115	7.1984	8.6039	.	6.64569	6.19517	7.0962	.	7.27314	6.74103	7.80525
	RCP 4.5	2080	Wet	.	9.0371	8.1445	9.9297	.	7.72449	7.13616	8.31281	.	7.79818	7.09543	8.5009	.	6.63244	6.18193	7.08296	.	7.11695	6.58484	7.64906
	RCP 4.5	2081	Wet	.	9.4967	8.60404	10.3894	.	7.68075	7.09229	8.26921	.	7.9301	7.22735	8.6329	.	6.90216	6.45165	7.35268	.	6.85798	6.32587	7.39009
	RCP 4.5	2082	Wet	.	10.1613	9.26844	11.0541	.	7.75846	7.16987	8.34705	.	8.01658	7.31383	8.7193	.	6.90902	6.45851	7.35954	.	6.75942	6.22731	7.29153
	RCP 4.5	2083	Wet	.	10.3253	9.43224	11.2184	.	7.88734	7.29863	8.47605	.	7.94784	7.24509	8.6506	.	7.14456	6.69404	7.59507	.	6.68099	6.14888	7.2131
	RCP 4.5	2084	Wet	.	10.1072	9.21379	11.0005	.	7.75628	7.16745	8.3451	.	8.25417	7.55142	8.9569	.	7.23319	6.78268	7.68371	.	6.8678	6.33569	7.39991
	RCP 4.5	2085	Wet	.	9.714	8.8204	10.6077	.	7.57211	6.98318	8.16104	.	8.04364	7.34089	8.7464	.	6.87129	6.42078	7.32181	.	6.59354	6.06143	7.12565
	RCP 4.5	2086	Wet	.	9.7374	8.84354	10.6312	.	7.79518	7.20616	8.38421	.	8.26438	7.56163	8.9671	.	6.78589	6.33538	7.2364	.	6.66332	6.13121	7.19543
	RCP 4.5	2087	Wet	.	9.5865	8.69258	10.4804	.	7.68716	7.09805	8.27628	.	7.98776	7.28501	8.6905	.	6.79812	6.34761	7.24864	.	6.6421	6.10999	7.1742
	RCP 4.5	2088	Wet	.	9.3684	8.47446	10.2624	.	7.7718	7.1826	8.361	.	8.04024	7.33749	8.743	.	6.97797	6.52746	7.42848	.	6.92269	6.39058	7.4548
	RCP 4.5	2089	Wet	.	8.9618	8.06784	9.8558	.	7.75902	7.16974	8.3483	.	8.05745	7.3547	8.7602	.	6.86918	6.41866	7.31969	.	6.95739	6.42528	7.4895
	RCP 4.5	2090	Wet	.	8.7914	7.89737	9.6853	.	7.76065	7.1713	8.35	.	8.17036	7.46762	8.8731	.	6.73231	6.2818	7.18283	.	7.04706	6.51495	7.57917
	RCP 4.5	2091	Wet	.	8.7765	7.88243	9.6705	.	7.72938	7.13996	8.3188	.	7.8664	7.16365	8.5691	.	6.64874	6.19823	7.09925	.	6.84551	6.3134	7.37762
	RCP 4.5	2092	Wet	.	8.8337	7.93961	9.7278	.	7.86647	7.27699	8.45596	.	8.07985	7.3771	8.7826	.	6.9862	6.53569	7.43671	.	6.99565	6.46354	7.52775
	RCP 4.5	2093	Wet	.	8.7292	7.835	9.6235	.	7.66677	7.07723	8.25631	.	7.84822	7.14548	8.551	.	6.82692	6.3764	7.27743	.	6.89474	6.36263	7.42685
	RCP 4.5	2094	Wet	.	8.7926	7.89827	9.687	.	7.87965	7.29006	8.46925	.	8.04966	7.34691	8.7524	.	7.00695	6.55644	7.45746	.	7.01287	6.48076	7.54498
	RCP 4.5	2095	Wet	.	8.8415	7.94699	9.7359	.	7.82641	7.23676	8.41606	.	7.96636	7.26362	8.6691	.	6.92482	6.47431	7.37533	.	6.91277	6.38066	7.44488
	RCP 4.5	2096	Wet	.	8.9494	8.05488	9.844	.	7.85157	7.26188	8.44127	.	8.17833	7.47558	8.8811	.	6.85259	6.40208	7.30311	.	6.9757	6.44359	7.50781
	RCP 4.5	2097	Wet	.	8.934	8.0394	9.8286	.	7.8383	7.24855	8.42804	.	7.88907	7.18632	8.5918	.	6.93849	6.48797	7.389	.	6.72116	6.18905	7.25327
	RCP 4.5	2098	Wet	.	9.1721	8.27748	10.0668	.	7.78044	7.19066	8.37022	.	8.1304	7.42765	8.8331	.	6.8403	6.38978	7.29081	.	6.79117	6.25907	7.32328
	RCP 4.5	2099	Wet	.	9.2139	8.31923	10.1085	.	7.8662	7.27638	8.45602	.	8.04092	7.33817	8.7437	.	6.9986	6.54808	7.44911	.	6.68399	6.15188	7.2161
	RCP 4.5	2100	Wet	.	9.3642	8.46951	10.2588	.	7.84337	7.25352	8.43323	.	8.00359	7.30084	8.7063	.	6.84647	6.39595	7.29698	.	6.81321	6.2811	7.34532
	Historical	1964	Dry	9.90544	.	.	.	8.7126	.	.	.	0	.	.	.	8.55109	.	.	.	7.44882	.	.	.
	Historical	1965	Dry	9.84982	.	.	.	8.61179	.	.	.	0.32792	.	.	.	8.45813	.	.	.	7.44659	.	.	.
	Historical	1966	Dry	9.81764	.	.	.	8.58975	.	.	.	0.41	.	.	.	8.46526	.	.	.	7.36633	.	.	.
	Historical	1967	Dry	9.78552	.	.	.	8.56778	.	.	.	0.50796	.	.	.	8.36651	.	.	.	7.3687	.	.	.
	Historical	1968	Dry	9.75347	.	.	.	8.54587	.	.	.	0.69315	.	.	.	8.35937	.	.	.	7.22766	.	.	.
	Historical	1969	Dry	9.70174	9.7535	8.5995	10.9074	8.48508	8.54587	8.17653	8.91522	0	0.69315	-0.24675	1.633	8.24052	8.35937	7.86191	8.85682	7.44044	7.22766	6.54231	7.91301
	Historical	1970	Dry	9.71008	9.8277	9.24602	10.4094	8.51592	8.37287	8.03602	8.70971	1.17837	0.53666	-0.3581	1.4314	8.23647	8.42265	7.92531	8.92	7.30378	7.43696	6.97913	7.8948
	Historical	1971	Dry	9.72902	9.5933	9.13746	10.0491	8.61686	8.47912	8.14869	8.80956	0	0.69431	-0.18265	1.5713	8.55005	8.2961	7.80076	8.79144	7.30854	7.17952	6.76293	7.59612
	Historical	1972	Dry	9.66491	9.5065	9.05757	9.9554	8.66268	8.43136	8.11462	8.7481	2.56495	2.64693	1.80079	3.4931	8.0762	8.25466	7.78983	8.71949	7.00851	6.74695	6.41344	7.08046
	Historical	1973	Dry	9.63479	9.5395	9.09072	9.9882	8.24892	8.35997	8.04417	8.67577	5.1985	4.31912	3.50016	5.1381	7.83241	8.19713	7.7487	8.64557	7.37526	7.46741	7.1463	7.78851
	Historical	1974	Dry	9.50054	9.6554	9.20755	10.1032	8.46989	8.37706	8.06413	8.68999	4.39445	5.05498	4.25399	5.856	8.32724	8.22488	7.78792	8.66185	7.49443	7.33545	7.01978	7.65112
	Historical	1975	Dry	9.71974	9.3609	8.91385	9.8079	8.50755	8.44514	8.13263	8.75765	5.79909	5.65693	4.86702	6.4468	8.43055	8.34492	7.90835	8.7815	7.61972	7.41124	7.09996	7.72253
	Historical	1976	Dry	9.81143	9.4629	9.01655	9.9093	8.32845	8.30336	7.99211	8.61462	6.10479	5.6903	4.9073	6.4733	8.1374	8.07305	7.63705	8.50904	7.28001	7.42491	7.11692	7.7329
	Historical	1977	Dry	9.60871	9.3081	8.86207	9.7541	8.06338	8.32359	8.01258	8.63461	5.84788	6.24059	5.46206	7.0191	7.93791	7.84123	7.4082	8.27426	7.32284	7.24672	6.9413	7.55214
	Historical	1978	Dry	9.58436	9.3093	8.86353	9.755	8.25796	8.01766	7.70735	8.32797	6.06735	6.34759	5.57207	7.1231	8.0913	7.86666	7.4357	8.29761	7.22438	7.21518	6.91188	7.51849
	Historical	1979	Dry	9.54047	9.4644	9.01884	9.91	8.26246	8.13094	7.82078	8.4411	6.23043	6.6178	5.84438	7.3912	7.91578	7.85325	7.42248	8.28401	7.2544	7.16945	6.86794	7.47096
	Historical	1980	Dry	9.4966	9.5788	9.13333	10.0243	8.26695	8.32554	8.01584	8.63524	6.39356	6.66892	5.89701	7.4408	7.9256	7.77535	7.34476	8.20594	7.26877	7.39214	7.09217	7.69211
	Historical	1981	Dry	9.45274	9.3332	8.88784	9.7786	8.27145	8.21435	7.90475	8.52395	6.55673	6.42468	5.65388	7.1955	7.87104	7.82075	7.39163	8.24987	7.16063	7.19331	6.89468	7.49195
	Historical	1982	Dry	9.40892	9.5262	9.08088	9.9716	8.27594	8.30497	7.99569	8.61425	6.71995	6.28852	5.51854	7.0585	7.6493	7.73041	7.30195	8.15888	7.08567	6.9952	6.69773	7.29267
	Historical	1983	Dry	9.36512	9.3571	8.9118	9.8025	8.28045	8.29521	7.98601	8.60441	6.88319	6.8065	6.03715	7.5759	7.86669	7.72952	7.30118	8.15786	7.16974	7.25232	6.9559	7.54875
	Historical	1984	Dry	9.32136	9.4057	8.96038	9.851	8.28496	8.38851	8.07954	8.69748	7.04646	7.15432	6.38545	7.9232	7.58696	7.59681	7.16861	8.02501	7.04458	7.10948	6.81398	7.40498
	Historical	1985	Dry	9.27764	9.3661	8.92078	9.8114	8.28949	8.41822	8.10931	8.72713	7.20976	7.55534	6.78682	8.3238	7.64494	7.58082	7.15351	8.00814	7.0327	7.02043	6.72576	7.3151
	Historical	1986	Dry	9.37991	9.3722	8.92687	9.8174	8.36591	8.39323	8.08451	8.70196	7.28345	7.50924	6.741	8.2775	7.33943	7.20614	6.77906	7.63322	7.01181	6.91925	6.62533	7.21317
	Historical	1987	Dry	8.9114	8.8739	8.42865	9.3192	8.37402	8.27383	7.96515	8.58251	7.95718	7.66068	6.89265	8.4287	7.54771	7.28782	6.86083	7.71482	7.03527	6.89553	6.60229	7.18878
	Historical	1988	Dry	9.04798	8.9006	8.45529	9.3458	8.30416	8.17887	7.87033	8.48741	7.45356	7.32418	6.5563	8.0921	7.03384	7.20377	6.77693	7.63061	6.94466	6.93319	6.64056	7.22582
	Historical	1989	Dry	9.12184	9.2369	8.79165	9.6822	8.10591	8.1692	7.8607	8.4777	6.75693	7.09034	6.32256	7.8581	7.21969	7.10471	6.67844	7.53098	6.62936	6.82063	6.52856	7.1127
	Historical	1990	Dry	8.91463	8.8465	8.40126	9.2918	8.23986	8.36587	8.05749	8.67426	7.6039	7.30104	6.53333	8.0687	7.32055	7.38442	6.95824	7.81061	6.40026	6.50802	6.21645	6.79958
	Historical	1991	Dry	8.86954	8.9436	8.4983	9.3889	8.00437	8.19899	7.89064	8.50734	7.7907	7.24183	6.47417	8.0095	7.092	7.28332	6.85718	7.70945	6.74993	6.68636	6.39526	6.97746
	Historical	1992	Dry	8.88086	8.8919	8.4466	9.3372	7.84031	8.11814	7.80989	8.4264	7.27656	7.7088	6.94116	8.4764	7.15929	7.08144	6.65548	7.5074	6.72743	6.92691	6.63623	7.2176
	Historical	1993	Dry	8.33759	8.6123	8.16706	9.0576	8.06934	7.90386	7.59563	8.21209	7.83003	7.49482	6.72719	8.2624	6.97728	7.02015	6.59455	7.44575	6.54679	6.45645	6.16615	6.74676
	Historical	1994	Dry	9.17409	8.9356	8.49035	9.3809	7.80221	7.92218	7.61403	8.23033	7.31986	7.25388	6.48626	8.0215	6.72623	7.02242	6.59685	7.44798	6.59987	6.55721	6.26725	6.84718
	Historical	1995	Dry	8.59026	8.5876	8.14236	9.0329	7.90581	8.07549	7.76736	8.38361	7.58832	7.50575	6.73812	8.2734	7.35692	7.14171	6.71618	7.56724	7.56476	7.20609	6.91644	7.49575
	Historical	1996	Dry	8.29355	8.8878	8.4425	9.333	7.75791	7.90544	7.59738	8.2135	7.41698	6.87453	6.10691	7.6421	7.26753	7.12891	6.70356	7.55426	7.41878	7.46817	7.17878	7.75755
	Historical	1997	Dry	8.63923	8.6489	8.20367	9.0942	8.39773	8.13832	7.83028	8.44636	8.05738	7.77477	7.00716	8.5424	7.37337	7.25354	6.82842	7.67867	7.32515	7.12531	6.83617	7.41445
	Historical	1998	Dry	8.86432	8.8922	8.44692	9.3375	7.95928	8.07307	7.76509	8.38105	7.84971	7.70317	6.93557	8.4708	6.93342	7.13855	6.71344	7.56366	7.19444	7.12784	6.83891	7.41676
	Historical	1999	Dry	9.69332	9.251	8.80572	9.6962	8.49167	8.25487	7.94691	8.56284	8.11552	7.5755	6.80793	8.3431	7.57302	7.41895	6.99387	7.84403	7.40306	7.66317	7.37443	7.95191
	Historical	2000	Dry	9.42052	9.3495	8.90422	9.7947	8.6063	8.43622	8.12831	8.74413	7.48381	7.579	6.81146	8.3465	7.34084	7.15386	6.72896	7.57876	6.92067	6.90271	6.61412	7.19129
	Historical	2001	Dry	9.50651	9.5489	9.10365	9.9942	8.45212	8.29167	7.98378	8.59957	7.11151	7.48444	6.71695	8.2519	6.92166	7.02911	6.60434	7.45389	6.77422	6.83604	6.54759	7.1245
	Historical	2002	Dry	9.19421	9.3487	8.90348	9.794	8.23959	8.25126	7.94341	8.55911	7.08003	7.62675	6.8593	8.3942	7.08339	7.18866	6.7639	7.61342	5.79606	6.15419	5.86584	6.44254
	Historical	2003	Dry	9.29725	9.4392	8.994	9.8845	8.20713	8.28917	7.98133	8.597	7.74716	8.24669	7.47929	9.0141	6.58893	7.18507	6.76033	7.6098	6.14419	6.17217	5.8839	6.46043
	Historical	2004	Dry	8.68677	9.41	8.96476	9.8553	8.16905	8.13101	7.82322	8.43881	8.14352	8.30778	7.54043	9.0751	6.79906	6.93795	6.51339	7.36251	6.85751	6.79966	6.51147	7.08786
	Historical	2005	Dry	9.11844	8.9791	8.53383	9.4243	8.53915	8.46677	8.15899	8.77455	7.82883	7.7383	6.971	8.5056	7.03615	6.9419	6.5174	7.3664	6.2804	6.485	6.19685	6.77314
	Historical	2006	Dry	8.45297	8.7218	8.27658	9.1671	8.23933	8.38131	8.07356	8.68906	7.62364	7.52397	6.75671	8.2912	6.67708	7.05503	6.63055	7.47951	6.04501	6.33653	6.04842	6.62464
	Historical	2007	Dry	9.28089	9.0604	8.61519	9.5057	8.47199	8.21561	7.90787	8.52335	7.46279	7.52393	6.7567	8.2912	7.36391	6.68617	6.26172	7.11062	6.32436	5.98272	5.69463	6.2708
	Historical	2008	Dry	9.2617	9.2289	8.7837	9.6742	8.60995	8.71211	8.4044	9.01982	8.05007	7.89076	7.12356	8.658	6.64769	6.78126	6.35696	7.20557	6.18002	6.13854	5.85047	6.42661
	Historical	2009	Dry	9.09628	9.0502	8.60495	9.4954	8.87933	8.67212	8.36442	8.97982	7.65776	7.74787	6.9807	8.515	6.85224	6.97966	6.55539	7.40393	6.3081	6.29136	6.0033	6.57941
	Historical	2010	Dry	9.23367	9.195	8.74973	9.6402	8.47991	8.7996	8.49193	9.10726	7.80507	7.81333	7.04618	8.5805	5.83773	6.17252	5.74826	6.59678	6.47851	6.47248	6.18443	6.76053
	Historical	2011	Dry	8.80837	9.3949	8.94963	9.8401	8.28375	8.40566	8.09801	8.71332	8.58914	7.90124	7.1341	8.6684	6.6733	6.40324	5.97902	6.82745	5.78996	5.85823	5.57019	6.14627
	Historical	2012	Dry	9.09403	8.9276	8.48238	9.3729	8.08825	8.37599	8.06836	8.68362	7.69348	8.30755	7.54042	9.0747	7.02108	6.89136	6.46726	7.31546	5.72685	5.75105	5.46302	6.03908
	RCP 8.5	2013	Dry	.	8.7879	8.3427	9.2332	.	8.30092	7.99402	8.60782	.	7.74465	6.97807	8.5112	.	5.92896	5.52229	6.33562	.	5.3752	5.11935	5.63105
	RCP 8.5	2014	Dry	.	8.6953	8.22086	9.1697	.	8.34209	8.01694	8.66723	.	8.52368	7.72056	9.3268	.	6.36008	5.93862	6.78154	.	5.98154	5.64559	6.31749
	RCP 8.5	2015	Dry	.	8.4627	7.91241	9.013	.	8.15319	7.81043	8.49594	.	8.21023	7.39307	9.0274	.	6.65971	6.23708	7.08235	.	6.36848	5.92762	6.80933
	RCP 8.5	2016	Dry	.	8.554	7.96278	9.1453	.	8.14967	7.80076	8.49859	.	8.03187	7.21194	8.8518	.	5.81787	5.38103	6.25471	.	6.29909	5.70487	6.8933
	RCP 8.5	2017	Dry	.	8.5002	7.84292	9.1575	.	8.25648	7.90655	8.60641	.	7.95989	7.11413	8.8057	.	6.39265	5.95095	6.83435	.	6.23051	5.59213	6.86889
	RCP 8.5	2018	Dry	.	8.5318	7.79108	9.2726	.	8.24003	7.8874	8.59266	.	7.54571	6.66226	8.4292	.	6.77422	6.32659	7.22184	.	6.51682	5.87512	7.15852
	RCP 8.5	2019	Dry	.	8.6303	7.81745	9.4431	.	8.38943	8.03521	8.74365	.	7.74907	6.83924	8.6589	.	6.11547	5.66611	6.56482	.	6.76879	6.11833	7.41924
	RCP 8.5	2020	Dry	.	8.7848	7.92045	9.6491	.	8.17767	7.82247	8.53288	.	7.69474	6.77112	8.6184	.	6.43117	5.9734	6.88894	.	6.54211	5.87178	7.21243
	RCP 8.5	2021	Dry	.	8.7033	7.80804	9.5986	.	8.21126	7.85483	8.5677	.	7.60863	6.67864	8.5386	.	6.77841	6.31412	7.2427	.	6.74091	6.06352	7.41829
	RCP 8.5	2022	Dry	.	8.6191	7.71036	9.5279	.	8.23924	7.88193	8.59654	.	7.5276	6.59432	8.4609	.	6.20296	5.73838	6.66754	.	6.80521	6.1274	7.48301
	RCP 8.5	2023	Dry	.	8.6008	7.68931	9.5122	.	8.24504	7.88688	8.6032	.	7.7225	6.7872	8.6578	.	6.49648	6.02311	6.96984	.	6.73821	6.05907	7.41735
	RCP 8.5	2024	Dry	.	8.5589	7.64695	9.4709	.	8.14114	7.78213	8.50014	.	7.97919	7.04245	8.9159	.	6.75188	6.27414	7.22961	.	6.96398	6.28152	7.64644
	RCP 8.5	2025	Dry	.	8.7224	7.80464	9.6402	.	8.07111	7.71143	8.4308	.	7.7249	6.78711	8.6627	.	6.23127	5.7532	6.70934	.	7.23895	6.55517	7.92274
	RCP 8.5	2026	Dry	.	8.8361	7.90341	9.7687	.	8.09348	7.73311	8.45386	.	7.5026	6.56408	8.4411	.	6.51116	6.02646	6.99585	.	7.03544	6.35155	7.71934
	RCP 8.5	2027	Dry	.	9.1737	8.2179	10.1294	.	8.08718	7.72617	8.44819	.	7.33187	6.39286	8.2709	.	6.88478	6.39791	7.37166	.	6.96162	6.27747	7.64577
	RCP 8.5	2028	Dry	.	9.5882	8.60536	10.5711	.	8.11302	7.75144	8.47459	.	7.32358	6.38426	8.2629	.	6.73958	6.25239	7.22678	.	7.07504	6.3903	7.75978
	RCP 8.5	2029	Dry	.	9.8332	8.82458	10.8417	.	8.26768	7.90555	8.6298	.	7.26556	6.32604	8.2051	.	7.049	6.55768	7.54033	.	7.04784	6.36283	7.73285
	RCP 8.5	2030	Dry	.	10.0929	9.06427	11.1215	.	8.31239	7.94977	8.67502	.	7.2404	6.30075	8.18	.	7.17274	6.68058	7.66491	.	6.86326	6.17821	7.5483
	RCP 8.5	2031	Dry	.	9.7707	8.72961	10.8118	.	8.35241	7.98933	8.7155	.	7.60096	6.66123	8.5407	.	7.0015	6.50911	7.4939	.	6.808	6.1229	7.49311
	RCP 8.5	2032	Dry	.	9.65	8.60337	10.6966	.	8.20176	7.83824	8.56529	.	7.54589	6.60611	8.4857	.	6.98336	6.48871	7.47801	.	6.6567	5.97149	7.34191
	RCP 8.5	2033	Dry	.	9.5562	8.5085	10.604	.	8.20475	7.84082	8.56868	.	7.98264	7.04282	8.9225	.	6.93523	6.44035	7.43012	.	6.85333	6.16806	7.5386
	RCP 8.5	2034	Dry	.	9.4249	8.37695	10.4728	.	8.17958	7.81528	8.54388	.	7.91328	6.97343	8.8531	.	6.8118	6.31677	7.30683	.	6.77063	6.08535	7.45591
	RCP 8.5	2035	Dry	.	9.2877	8.23744	10.3379	.	8.33685	7.9722	8.70151	.	7.78473	6.84486	8.7246	.	7.07167	6.57553	7.56782	.	6.85963	6.17434	7.54493
	RCP 8.5	2036	Dry	.	9.2995	8.24323	10.3558	.	8.35888	7.9939	8.72386	.	7.69586	6.75598	8.6357	.	6.92836	6.43216	7.42455	.	6.74033	6.05502	7.42565
	RCP 8.5	2037	Dry	.	8.9707	7.90488	10.0366	.	8.34377	7.97849	8.70906	.	7.53536	6.59548	8.4752	.	6.8628	6.36652	7.35908	.	6.81633	6.131	7.50166
	RCP 8.5	2038	Dry	.	8.6324	7.55511	9.7097	.	8.28513	7.91956	8.65069	.	7.31215	6.37226	8.252	.	6.96574	6.46896	7.46252	.	6.60095	5.91562	7.28628
	RCP 8.5	2039	Dry	.	8.1869	7.09853	9.2752	.	8.25988	7.89406	8.62571	.	7.77325	6.83336	8.7131	.	6.80667	6.30986	7.30348	.	6.5783	5.89296	7.26364
	RCP 8.5	2040	Dry	.	7.97	6.87288	9.0671	.	8.10733	7.74126	8.47339	.	8.02573	7.08584	8.9656	.	6.66946	6.1726	7.16632	.	6.50771	5.82237	7.19305
	RCP 8.5	2041	Dry	.	8.0417	6.93903	9.1443	.	8.10433	7.73804	8.47063	.	8.1676	7.2277	9.1075	.	6.79404	6.29698	7.29111	.	7.06086	6.37552	7.74621
	RCP 8.5	2042	Dry	.	8.0165	6.91133	9.1216	.	8.0838	7.7173	8.45031	.	7.82208	6.88218	8.762	.	6.65362	6.15651	7.15072	.	7.20517	6.51982	7.89051
	RCP 8.5	2043	Dry	.	8.5694	7.46381	9.6751	.	8.12994	7.76324	8.49664	.	7.15098	6.21108	8.0909	.	6.73531	6.23818	7.23244	.	7.02733	6.34199	7.71268
	RCP 8.5	2044	Dry	.	8.5981	7.49238	9.7038	.	8.35147	7.98459	8.71836	.	7.52516	6.58527	8.4651	.	7.17702	6.6798	7.67423	.	6.96537	6.28002	7.65072
	RCP 8.5	2045	Dry	.	9.2102	8.10347	10.3169	.	8.25702	7.88997	8.62408	.	7.33648	6.39658	8.2764	.	6.92863	6.43138	7.42589	.	6.51304	5.82769	7.19839
	RCP 8.5	2046	Dry	.	9.471	8.36158	10.5803	.	8.38193	8.01472	8.74915	.	8.21318	7.27329	9.1531	.	7.04907	6.5518	7.54634	.	6.88274	6.19739	7.56809
	RCP 8.5	2047	Dry	.	9.8654	8.75176	10.979	.	8.10859	7.74123	8.47595	.	7.74237	6.80248	8.6823	.	6.92695	6.42965	7.42425	.	6.69139	6.00605	7.37674
	RCP 8.5	2048	Dry	.	9.8343	8.71559	10.9531	.	8.24526	7.87776	8.61275	.	7.65123	6.71134	8.5911	.	6.8992	6.40187	7.39654	.	6.86141	6.17606	7.54676
	RCP 8.5	2049	Dry	.	9.7462	8.6225	10.87	.	8.10619	7.73857	8.47382	.	7.44541	6.50552	8.3853	.	6.86777	6.37042	7.36512	.	6.30074	5.61539	6.98609
	RCP 8.5	2050	Dry	.	9.7283	8.60061	10.8561	.	8.00709	7.63935	8.37483	.	7.5478	6.60791	8.4877	.	7.04853	6.55117	7.54588	.	6.74596	6.06061	7.43131
	RCP 8.5	2051	Dry	.	9.6116	8.4813	10.7418	.	8.02777	7.65992	8.39563	.	7.56094	6.62105	8.5008	.	6.90936	6.41198	7.40675	.	6.96812	6.28277	7.65347
	RCP 8.5	2052	Dry	.	9.3913	8.25987	10.5227	.	8.0585	7.69054	8.42645	.	7.35618	6.41629	8.2961	.	6.94637	6.44898	7.44376	.	6.99854	6.31319	7.68389
	RCP 8.5	2053	Dry	.	9.0244	7.89275	10.1561	.	8.1276	7.75955	8.49565	.	7.4793	6.53941	8.4192	.	7.17212	6.67473	7.66952	.	6.93663	6.25128	7.62198
	RCP 8.5	2054	Dry	.	9.0197	7.88801	10.1514	.	8.07669	7.70854	8.44483	.	7.40654	6.46664	8.3464	.	6.95572	6.45831	7.45313	.	7.1007	6.41535	7.78605
	RCP 8.5	2055	Dry	.	8.7058	7.57371	9.838	.	8.21473	7.84651	8.58295	.	7.64134	6.70144	8.5812	.	7.00225	6.50483	7.49967	.	7.13964	6.45429	7.82499
	RCP 8.5	2056	Dry	.	8.6872	7.55381	9.8205	.	8.14475	7.77645	8.51305	.	7.494	6.5541	8.4339	.	7.08287	6.58545	7.58029	.	6.8702	6.18485	7.55555
	RCP 8.5	2057	Dry	.	8.7723	7.63704	9.9076	.	8.193	7.82463	8.56137	.	7.76229	6.8224	8.7022	.	6.99148	6.49405	7.48891	.	6.99104	6.30569	7.67638
	RCP 8.5	2058	Dry	.	8.9584	7.82081	10.0961	.	8.1571	7.78866	8.52554	.	7.48164	6.54175	8.4215	.	6.93369	6.43625	7.43112	.	6.82496	6.13961	7.51031
	RCP 8.5	2059	Dry	.	8.9598	7.81986	10.0997	.	8.28129	7.91279	8.64979	.	7.43588	6.49599	8.3758	.	7.18824	6.69081	7.68568	.	6.84213	6.15678	7.52748
	RCP 8.5	2060	Dry	.	9.2926	8.15078	10.4343	.	8.21096	7.8424	8.57952	.	7.42344	6.48355	8.3633	.	6.97565	6.47821	7.47308	.	6.44555	5.7602	7.1309
	RCP 8.5	2061	Dry	.	9.569	8.42606	10.712	.	8.2459	7.87728	8.61451	.	7.74409	6.80419	8.684	.	7.09833	6.60089	7.59577	.	6.56944	5.88409	7.25479
	RCP 8.5	2062	Dry	.	9.5735	8.43002	10.717	.	8.32734	7.95867	8.696	.	7.71353	6.77363	8.6534	.	7.21485	6.7174	7.71229	.	6.57864	5.89329	7.26399
	RCP 8.5	2063	Dry	.	9.6093	8.46571	10.7529	.	8.35514	7.98643	8.72385	.	7.63923	6.69934	8.5791	.	6.88498	6.38754	7.38243	.	6.46149	5.77614	7.14684
	RCP 8.5	2064	Dry	.	9.5309	8.38727	10.6745	.	8.3105	7.94174	8.67925	.	7.96518	7.02528	8.9051	.	6.89314	6.39569	7.39059	.	6.35177	5.66642	7.03712
	RCP 8.5	2065	Dry	.	9.3475	8.20371	10.4914	.	8.18567	7.81687	8.55447	.	7.9455	7.0056	8.8854	.	6.9246	6.42716	7.42205	.	6.43274	5.7474	7.11809
	RCP 8.5	2066	Dry	.	9.2599	8.11552	10.4043	.	8.18085	7.81202	8.54968	.	7.8035	6.8636	8.7434	.	6.6202	6.12275	7.11765	.	6.49722	5.81187	7.18257
	RCP 8.5	2067	Dry	.	8.999	7.85376	10.1443	.	8.17581	7.80694	8.54468	.	7.76608	6.82619	8.706	.	6.70719	6.20973	7.20464	.	6.63153	5.94618	7.31688
	RCP 8.5	2068	Dry	.	8.7287	7.5824	9.8751	.	8.1295	7.7606	8.4984	.	7.42391	6.48401	8.3638	.	6.75781	6.26036	7.25526	.	6.61609	5.93074	7.30144
	RCP 8.5	2069	Dry	.	8.6103	7.46286	9.7577	.	8.11068	7.74175	8.47961	.	7.44046	6.50057	8.3804	.	6.63132	6.13387	7.12878	.	6.72304	6.03769	7.40839
	RCP 8.5	2070	Dry	.	8.3279	7.17963	9.4762	.	8.1236	7.75464	8.49256	.	7.63422	6.69432	8.5741	.	6.7684	6.27095	7.26585	.	6.87024	6.18489	7.55559
	RCP 8.5	2071	Dry	.	8.2456	7.09679	9.3944	.	8.09001	7.72103	8.459	.	7.3912	6.45131	8.3311	.	6.69176	6.19431	7.18922	.	6.82714	6.14179	7.51249
	RCP 8.5	2072	Dry	.	8.4331	7.28402	9.5822	.	8.16715	7.79814	8.53616	.	7.58437	6.64448	8.5243	.	6.6729	6.17544	7.17035	.	7.09983	6.41449	7.78518
	RCP 8.5	2073	Dry	.	8.5246	7.37543	9.6737	.	8.22225	7.85321	8.59128	.	7.63646	6.69656	8.5764	.	6.84492	6.34747	7.34237	.	7.0818	6.39645	7.76715
	RCP 8.5	2074	Dry	.	8.7006	7.55147	9.8498	.	8.36895	7.99989	8.738	.	7.58642	6.64652	8.5263	.	6.85509	6.35764	7.35254	.	6.79595	6.1106	7.4813
	RCP 8.5	2075	Dry	.	8.9652	7.81593	10.1144	.	8.37982	8.01075	8.7489	.	7.8767	6.93681	8.8166	.	6.7274	6.22994	7.22485	.	6.82646	6.14111	7.51181
	RCP 8.5	2076	Dry	.	9.1655	8.01596	10.3149	.	8.20374	7.83465	8.57284	.	7.67029	6.7304	8.6102	.	6.66224	6.16478	7.15969	.	6.81931	6.13396	7.50466
	RCP 8.5	2077	Dry	.	9.2491	8.09923	10.399	.	8.20788	7.83877	8.577	.	7.4749	6.53501	8.4148	.	6.69883	6.20138	7.19629	.	6.71845	6.0331	7.40379
	RCP 8.5	2078	Dry	.	9.4215	8.27109	10.5719	.	8.1175	7.74837	8.48663	.	7.51844	6.57855	8.4583	.	6.68984	6.19238	7.18729	.	6.46811	5.78276	7.15346
	RCP 8.5	2079	Dry	.	9.7978	8.64689	10.9487	.	8.13628	7.76714	8.50543	.	7.63791	6.69802	8.5778	.	6.81558	6.31813	7.31304	.	6.54209	5.85674	7.22744
	RCP 8.5	2080	Dry	.	9.9713	8.82002	11.1226	.	8.27434	7.90519	8.6435	.	7.73839	6.7985	8.6783	.	6.95442	6.45696	7.45187	.	6.81249	6.12714	7.49784
	RCP 8.5	2081	Dry	.	10.2413	9.08973	11.3929	.	8.32723	7.95806	8.69639	.	7.61449	6.6746	8.5544	.	6.89706	6.39961	7.39452	.	6.6772	5.99185	7.36254
	RCP 8.5	2082	Dry	.	10.3018	9.15007	11.4534	.	8.40578	8.03659	8.77496	.	7.83937	6.89947	8.7793	.	6.94886	6.45141	7.44632	.	6.45412	5.76877	7.13947
	RCP 8.5	2083	Dry	.	10.2479	9.09623	11.3997	.	8.33591	7.96671	8.7051	.	7.76939	6.8295	8.7093	.	6.94494	6.44748	7.44239	.	6.29312	5.60777	6.97847
	RCP 8.5	2084	Dry	.	10.0866	8.93486	11.2383	.	8.35888	7.98968	8.72808	.	7.78476	6.84487	8.7247	.	6.80122	6.30376	7.29867	.	6.39674	5.71139	7.08209
	RCP 8.5	2085	Dry	.	9.9108	8.75907	11.0626	.	8.27592	7.90671	8.64513	.	7.78369	6.84379	8.7236	.	6.73082	6.23337	7.22828	.	6.15664	5.47129	6.84199
	RCP 8.5	2086	Dry	.	9.5756	8.42377	10.7275	.	8.29939	7.93017	8.66861	.	7.89574	6.95584	8.8356	.	6.90088	6.40342	7.39833	.	6.28338	5.59803	6.96873
	RCP 8.5	2087	Dry	.	9.1778	8.02573	10.3299	.	8.28404	7.91481	8.65327	.	7.74871	6.80882	8.6886	.	6.72147	6.22401	7.21892	.	6.29429	5.60894	6.97964
	RCP 8.5	2088	Dry	.	9.0376	7.88525	10.1899	.	8.32387	7.95463	8.6931	.	7.72798	6.78808	8.6679	.	6.62827	6.13082	7.12573	.	6.3833	5.69795	7.06865
	RCP 8.5	2089	Dry	.	8.674	7.52143	9.8265	.	8.36279	7.99355	8.73204	.	7.97739	7.03749	8.9173	.	6.8087	6.31125	7.30616	.	6.40452	5.71918	7.08987
	RCP 8.5	2090	Dry	.	8.4923	7.33958	9.645	.	8.37343	8.00417	8.74268	.	7.87569	6.93579	8.8156	.	6.69999	6.20254	7.19745	.	6.32643	5.64108	7.01178
	RCP 8.5	2091	Dry	.	8.3485	7.19563	9.5013	.	8.4779	8.10864	8.84716	.	8.05963	7.11973	8.9995	.	6.55956	6.06211	7.05702	.	6.51201	5.82666	7.19736
	RCP 8.5	2092	Dry	.	8.0612	6.90829	9.2141	.	8.40664	8.03737	8.7759	.	7.96764	7.02774	8.9075	.	6.52451	6.02706	7.02197	.	6.42485	5.7395	7.1102
	RCP 8.5	2093	Dry	.	7.957	6.80412	9.1099	.	8.34372	7.97445	8.71299	.	7.90918	6.96928	8.8491	.	6.38587	5.88841	6.88332	.	6.33503	5.64968	7.02038
	RCP 8.5	2094	Dry	.	8.0695	6.91655	9.2224	.	8.15283	7.78356	8.52211	.	8.07379	7.1339	9.0137	.	6.33849	5.84104	6.83595	.	6.33173	5.64638	7.01707
	RCP 8.5	2095	Dry	.	8.2429	7.08997	9.3958	.	8.16448	7.7952	8.53377	.	7.87341	6.93351	8.8133	.	6.44325	5.94579	6.94071	.	6.66953	5.98418	7.35488
	RCP 8.5	2096	Dry	.	8.5615	7.40852	9.7145	.	8.21131	7.84203	8.5806	.	7.45143	6.51154	8.3913	.	6.37653	5.87907	6.87398	.	6.57322	5.88787	7.25857
	RCP 8.5	2097	Dry	.	8.7302	7.57711	9.8833	.	8.26832	7.89903	8.6376	.	7.57479	6.63489	8.5147	.	6.62847	6.13101	7.12592	.	6.69694	6.01159	7.38229
	RCP 8.5	2098	Dry	.	9.2528	8.09965	10.406	.	8.15987	7.79058	8.52916	.	7.4396	6.49971	8.3795	.	6.67271	6.17526	7.17017	.	6.63434	5.94899	7.31969
	RCP 8.5	2099	Dry	.	9.4639	8.31061	10.6172	.	8.34929	7.97999	8.71858	.	7.77356	6.83367	8.7135	.	6.64651	6.14905	7.14396	.	6.75839	6.07305	7.44374
	RCP 8.5	2100	Dry	.	9.8294	8.676	10.9828	.	8.28167	7.91237	8.65097	.	7.65295	6.71306	8.5928	.	6.6747	6.17724	7.17215	.	6.5426	5.85725	7.22795
	Historical	1964	Wet	9.61066	.	.	.	8.52496	.	.	.	2.48491	.	.	.	7.33717	.	.	.	7.2547	.	.	.
	Historical	1965	Wet	9.33724	.	.	.	8.3299	.	.	.	2.19722	.	.	.	7.11477	.	.	.	7.14992	.	.	.
	Historical	1966	Wet	9.35083	.	.	.	8.29113	.	.	.	3.91909	.	.	.	7.46449	.	.	.	7.24542	.	.	.
	Historical	1967	Wet	9.46976	.	.	.	8.25733	.	.	.	3.73095	.	.	.	7.60212	.	.	.	7.26479	.	.	.
	Historical	1968	Wet	9.57623	.	.	.	8.02584	.	.	.	3.2581	.	.	.	7.74028	.	.	.	7.28427	.	.	.
	Historical	1969	Wet	9.57654	9.5762	8.68102	10.4714	8.22382	8.02584	7.4355	8.61618	4.24766	3.2581	2.55535	3.9608	7.8781	7.74028	7.28977	8.1908	7.30344	7.28427	6.75216	7.81638
	Historical	1970	Wet	9.64024	9.5718	9.00566	10.1378	8.10872	8.08124	7.63479	8.52768	4.76786	4.6756	4.01646	5.3347	8.03926	8.03831	7.58976	8.48686	7.37713	7.3301	6.91947	7.74074
	Historical	1971	Wet	9.67118	9.6253	9.08873	10.1619	8.59526	8.60244	8.21964	8.98523	5.09987	5.31418	4.73315	5.8952	8.24302	8.2819	7.84249	8.72131	6.93245	7.0853	6.68708	7.48351
	Historical	1972	Wet	9.59342	9.6113	9.09523	10.1273	8.22778	8.30061	7.99504	8.60618	6.02948	6.16321	5.588	6.7384	7.96572	7.87427	7.542	8.20654	7.3202	7.25214	6.89585	7.60843
	Historical	1973	Wet	9.52927	9.2106	8.75014	9.6711	8.26023	8.28796	7.98722	8.58871	6.81344	6.09793	5.525	6.6709	8.2089	8.1402	7.84643	8.43397	7.47136	7.20011	6.85029	7.54993
	Historical	1974	Wet	9.67859	9.733	9.32186	10.1442	8.25245	8.57934	8.29561	8.86307	6.36475	6.51741	5.94928	7.0855	8.23748	8.18476	7.91858	8.45094	7.2145	7.16957	6.82131	7.51783
	Historical	1975	Wet	9.47665	9.4808	9.10544	9.8562	8.36341	8.46146	8.17939	8.74353	6.79681	7.31089	6.74852	7.8733	8.14176	8.34131	8.07801	8.60461	7.39386	7.35871	7.01194	7.70548
	Historical	1976	Wet	9.21632	9.1061	8.75452	9.4577	8.57678	8.31274	8.03818	8.58729	7.3192	6.94909	6.39234	7.5058	8.13388	8.25055	7.98995	8.51115	7.76089	7.50952	7.16395	7.8551
	Historical	1977	Wet	9.22365	9.1774	8.84238	9.5124	8.72794	8.43755	8.16383	8.71127	6.86797	7.09171	6.54006	7.6434	7.93916	7.87898	7.62632	8.13164	7.15383	7.44473	7.10007	7.78939
	Historical	1978	Wet	9.36413	9.1887	8.86562	9.5117	8.28664	8.26938	7.99989	8.53887	7.06604	7.40134	6.85421	7.9485	8.01611	7.92373	7.67513	8.17232	7.2445	7.34021	6.99631	7.68411
	Historical	1979	Wet	9.48852	9.5011	9.18708	9.8151	8.34681	8.29054	8.02156	8.55953	7.18349	7.31165	6.76851	7.8548	7.90431	7.86305	7.61604	8.11006	7.22871	7.42391	7.08066	7.76715
	Historical	1980	Wet	9.82287	9.8032	9.49619	10.1103	8.35679	8.50967	8.24341	8.77594	7.31255	7.44759	6.90798	7.9872	7.826	7.69109	7.44441	7.93776	7.19664	7.52948	7.18681	7.87216
	Historical	1981	Wet	9.50584	9.6422	9.3407	9.9437	8.29339	8.29371	8.02778	8.55964	7.36915	7.27823	6.74174	7.8147	7.7472	7.9387	7.69609	8.1813	7.16362	7.25569	6.91351	7.59787
	Historical	1982	Wet	9.43468	9.491	9.19398	9.7879	8.26346	8.19362	7.92959	8.45766	7.44629	7.31203	6.77832	7.8457	7.66711	7.6671	7.42539	7.90881	7.13086	7.13127	6.78954	7.47301
	Historical	1983	Wet	9.36352	9.2288	8.93561	9.5221	8.23353	8.03776	7.77396	8.30155	7.52343	7.37251	6.84129	7.9037	7.5904	7.68241	7.44173	7.92309	7.09933	6.99137	6.65004	7.33271
	Historical	1984	Wet	9.29236	9.3035	9.01345	9.5936	8.2036	8.15797	7.89557	8.42037	7.60058	7.68103	7.15204	8.21	7.50987	7.27321	7.03264	7.51378	7.06618	7.14512	6.80414	7.4861
	Historical	1985	Wet	9.2212	9.2579	8.97049	9.5453	8.17368	8.26726	8.00504	8.52948	7.67773	7.87456	7.34757	8.4016	7.43195	7.46881	7.23068	7.70693	7.03391	7.09717	6.75652	7.43783
	Historical	1986	Wet	9.15005	9.1683	8.88319	9.4534	8.14375	8.17511	7.91396	8.43626	7.75489	7.68906	7.16385	8.2143	7.35122	7.34165	7.10368	7.57963	7.00156	7.0045	6.66414	7.34486
	Historical	1987	Wet	9.10631	9.0068	8.72377	9.2899	8.04815	8.07605	7.81504	8.33706	7.90655	7.66422	7.14059	8.1878	7.27446	7.28704	7.04971	7.52437	6.96924	6.96982	6.62973	7.30991
	Historical	1988	Wet	8.74926	8.7081	8.42681	8.9894	7.9413	8.04079	7.78063	8.30095	7.66856	7.97516	7.45292	8.4974	7.19478	7.16186	6.92476	7.39896	6.89972	6.9775	6.63766	7.31735
	Historical	1989	Wet	8.90572	8.9932	8.71341	9.2729	7.87967	7.90567	7.64562	8.16572	7.95578	8.1136	7.59257	8.6346	6.79234	6.90202	6.66639	7.13764	6.89366	6.9016	6.56197	7.24122
	Historical	1990	Wet	9.32563	9.3749	9.09648	9.6533	8.37355	8.36477	8.10541	8.62414	7.98854	7.81376	7.29374	8.3338	7.51043	7.43743	7.20183	7.67303	6.95081	6.72732	6.3879	7.06673
	Historical	1991	Wet	9.13292	9.3465	9.06926	9.6236	8.10621	8.16609	7.90682	8.42536	8.13329	7.925	7.40581	8.4442	7.10414	7.36535	7.1301	7.6006	6.83303	6.88002	6.5408	7.21925
	Historical	1992	Wet	9.26946	9.1812	8.90502	9.4573	8.3395	8.16437	7.90566	8.42307	8.63213	8.38199	7.86348	8.9005	7.12125	7.20133	6.96645	7.4362	7.2349	7.08056	6.74151	7.41962
	Historical	1993	Wet	8.67386	8.7238	8.44856	8.999	8.08672	8.13004	7.87142	8.38867	7.74544	7.70722	7.18921	8.2252	6.88141	7.13867	6.90464	7.3727	6.70319	6.84998	6.51109	7.18888
	Historical	1994	Wet	8.87248	8.5916	8.31719	8.8661	8.11482	7.84239	7.58424	8.10054	8.1278	8.21593	7.69828	8.7336	7.05752	6.95219	6.71822	7.18617	7.00499	6.82364	6.48488	7.16239
	Historical	1995	Wet	8.68677	8.7546	8.48082	9.0284	8.15277	8.14282	7.88473	8.4009	8.22229	8.27206	7.75464	8.7895	6.88551	6.92412	6.6903	7.15793	7.02465	7.21623	6.87761	7.55485
	Historical	1996	Wet	8.78829	9.0755	8.80223	9.3488	7.88382	7.93658	7.6789	8.19426	8.32458	7.8199	7.30261	8.3372	7.30854	7.27222	7.03888	7.50556	7.22257	7.36113	7.02262	7.69963
	Historical	1997	Wet	9.11812	9.1259	8.85308	9.3988	7.92696	8.08401	7.82639	8.34163	8.31238	8.11636	7.59914	8.6336	7.60738	7.55165	7.31874	7.78457	7.30115	7.39944	7.06104	7.73784
	Historical	1998	Wet	8.42574	8.5462	8.27368	8.8187	7.62608	7.74664	7.48937	8.0039	7.77444	8.01723	7.50002	8.5344	7.27794	7.26299	7.03019	7.49578	7.11964	7.03108	6.69277	7.36939
	Historical	1999	Wet	9.46055	9.2166	8.94428	9.4889	8.56102	8.3522	8.09498	8.60942	9.14484	8.81876	8.30155	9.336	7.45876	7.5209	7.28816	7.75365	7.40184	7.32863	6.99039	7.66686
	Historical	2000	Wet	9.29072	9.2742	9.00207	9.5464	8.41804	8.28184	8.02493	8.53876	8.51899	8.43253	7.91533	8.9497	7.42476	7.28162	7.04937	7.51386	7.03527	6.8398	6.50164	7.17796
	Historical	2001	Wet	9.16681	9.1952	8.92309	9.4672	7.71423	7.94926	7.69239	8.20613	7.87626	8.32633	7.80917	8.8435	7.724	7.64837	7.41631	7.88043	6.67203	6.76551	6.4274	7.10361
	Historical	2002	Wet	9.04488	9.055	8.78296	9.327	8.28223	8.14958	7.89298	8.40618	8.17132	8.30292	7.78585	8.82	7.7003	7.57851	7.34659	7.81043	6.8742	6.5768	6.23874	6.91486
	Historical	2003	Wet	8.65277	8.7173	8.44527	8.9893	8.19091	8.41256	8.156	8.66913	8.04527	8.12925	7.6123	8.6462	7.51915	7.27639	7.04449	7.50829	6.68085	6.36368	6.02567	6.7017
	Historical	2004	Wet	8.46884	8.8906	8.6186	9.1627	8.00837	8.11967	7.86335	8.376	7.81238	7.84225	7.32548	8.359	7.15149	7.14909	6.91765	7.38053	6.57508	6.66694	6.32895	7.00492
	Historical	2005	Wet	8.86291	8.8155	8.54345	9.0875	8.57225	8.59611	8.33982	8.8524	7.48997	7.61446	7.0979	8.131	7.41818	7.3814	7.15002	7.61279	6.89366	6.6025	6.26454	6.94046
	Historical	2006	Wet	8.1274	8.1453	7.87325	8.4173	8.15622	8.14633	7.89025	8.40241	8.04141	8.01792	7.5016	8.5342	7.34601	7.3625	7.13125	7.59375	6.63988	6.47208	6.13413	6.81002
	Historical	2007	Wet	7.89133	7.9354	7.66344	8.2074	8.02093	8.13384	7.87779	8.38989	7.87246	7.67639	7.16033	8.1924	6.58893	6.78836	6.55715	7.01957	5.30827	5.8381	5.50017	6.17603
	Historical	2008	Wet	9.02714	8.9811	8.70911	9.2531	8.60227	8.53723	8.28137	8.79309	8.21338	8.19073	7.67495	8.7065	6.36819	6.62617	6.39533	6.857	6.41999	6.31033	5.9724	6.64825
	Historical	2009	Wet	9.39325	9.2497	8.97771	9.5216	8.537	8.48204	8.22621	8.73787	8.10289	8.23779	7.72228	8.7533	7.04925	7.00521	6.77438	7.23603	6.22654	6.22934	5.89142	6.56726
	Historical	2010	Wet	9.04853	9.026	8.75403	9.2979	8.63533	8.47115	8.21549	8.72681	8.00903	8.21028	7.69503	8.7255	6.49527	6.34108	6.11036	6.57181	6.31536	6.24009	5.90218	6.57801
	Historical	2011	Wet	8.53935	8.9613	8.68935	9.2332	8.22229	8.26287	8.00724	8.5185	8.9813	8.4583	7.94329	8.9733	6.27852	6.38108	6.15045	6.61172	5.8693	6.01023	5.67231	6.34814
	Historical	2012	Wet	9.30647	9.17	8.89807	9.4419	8.50573	8.33908	8.08361	8.59456	8.19146	8.52476	8.00995	9.0396	7.08506	6.93204	6.70167	7.1624	5.74939	5.93363	5.59572	6.27154
	RCP 8.5	2013	Wet	.	8.8664	8.59578	9.137	.	8.28103	8.02931	8.53276	.	8.26652	7.75638	8.7767	.	5.66122	5.53354	5.7889	.	6.09055	5.83526	6.34585
	RCP 8.5	2014	Wet	.	8.6497	8.31828	8.9811	.	8.1115	7.85606	8.36694	.	8.25031	7.66889	8.8317	.	6.44822	6.22165	6.6748	.	6.42802	6.0454	6.81064
	RCP 8.5	2015	Wet	.	8.6191	8.18382	9.0544	.	7.99857	7.68826	8.30888	.	8.23423	7.59243	8.876	.	6.69717	6.46472	6.92962	.	6.49149	6.03232	6.95066
	RCP 8.5	2016	Wet	.	8.7542	8.21241	9.2959	.	8.045	7.70034	8.38965	.	8.08114	7.41627	8.746	.	5.3755	5.0527	5.6983	.	6.45039	5.95718	6.9436
	RCP 8.5	2017	Wet	.	9.1465	8.56951	9.7235	.	8.08416	7.72309	8.44522	.	8.18617	7.50508	8.8673	.	6.21635	5.88341	6.5493	.	6.55316	6.04854	7.05778
	RCP 8.5	2018	Wet	.	9.4509	8.86473	10.037	.	8.06364	7.67727	8.45	.	8.05767	7.36927	8.7461	.	6.5575	6.21821	6.8968	.	6.6311	6.11667	7.14552
	RCP 8.5	2019	Wet	.	9.5	8.91283	10.0871	.	8.20759	7.80439	8.61079	.	8.22261	7.52916	8.9161	.	5.84265	5.4889	6.1964	.	6.83663	6.31345	7.35981
	RCP 8.5	2020	Wet	.	9.3778	8.78803	9.9675	.	7.83582	7.41709	8.25454	.	7.98957	7.29313	8.686	.	6.30726	5.93685	6.67766	.	6.77403	6.24668	7.30138
	RCP 8.5	2021	Wet	.	9.4829	8.87998	10.0858	.	7.9293	7.4952	8.3634	.	8.26747	7.56888	8.9661	.	6.35968	5.9806	6.73876	.	6.8425	6.31397	7.37104
	RCP 8.5	2022	Wet	.	9.556	8.92732	10.1847	.	7.8893	7.44352	8.33509	.	7.80324	7.10324	8.5032	.	5.69476	5.3133	6.07622	.	6.86758	6.33789	7.39727
	RCP 8.5	2023	Wet	.	9.5854	8.92246	10.2483	.	7.83088	7.37338	8.28838	.	7.8939	7.19294	8.5949	.	6.29269	5.89226	6.69312	.	7.16799	6.63706	7.69891
	RCP 8.5	2024	Wet	.	9.3614	8.66282	10.0599	.	7.8142	7.34604	8.28236	.	7.97052	7.26894	8.6721	.	6.4321	6.02536	6.83884	.	7.24607	6.71457	7.77757
	RCP 8.5	2025	Wet	.	9.4382	8.70909	10.1673	.	7.865	7.38775	8.34225	.	7.924	7.22201	8.626	.	5.71379	5.30613	6.12144	.	7.27105	6.73942	7.80267
	RCP 8.5	2026	Wet	.	9.612	8.86138	10.3626	.	7.95343	7.46738	8.43949	.	7.84215	7.1399	8.5444	.	6.28011	5.85748	6.70273	.	7.19923	6.66747	7.731
	RCP 8.5	2027	Wet	.	9.6232	8.86082	10.3856	.	7.94095	7.44698	8.43491	.	7.92324	7.22082	8.6257	.	6.72963	6.30379	7.15548	.	7.05041	6.51846	7.58235
	RCP 8.5	2028	Wet	.	9.7736	9.00712	10.5401	.	7.94191	7.4408	8.44302	.	8.01672	7.31419	8.7193	.	6.32903	5.90239	6.75567	.	6.95677	6.42474	7.48879
	RCP 8.5	2029	Wet	.	9.8853	9.11844	10.6522	.	8.07482	7.56699	8.58265	.	8.07841	7.3758	8.781	.	6.87592	6.43965	7.3122	.	6.91958	6.38754	7.45162
	RCP 8.5	2030	Wet	.	9.6919	8.92406	10.4598	.	7.90446	7.39055	8.41838	.	7.93993	7.23728	8.6426	.	7.12528	6.68778	7.56278	.	6.78791	6.25585	7.31996
	RCP 8.5	2031	Wet	.	9.4003	8.62779	10.1729	.	7.89563	7.3761	8.41515	.	8.08963	7.38694	8.7923	.	6.86375	6.42562	7.30189	.	6.93687	6.40478	7.46895
	RCP 8.5	2032	Wet	.	8.892	8.11	9.674	.	7.7841	7.25937	8.30883	.	7.88933	7.18662	8.592	.	6.93353	6.48998	7.37708	.	6.91935	6.38725	7.45145
	RCP 8.5	2033	Wet	.	8.637	7.84193	9.432	.	7.77298	7.24348	8.30248	.	8.00921	7.30649	8.7119	.	6.82634	6.38245	7.27023	.	6.96929	6.43719	7.50139
	RCP 8.5	2034	Wet	.	8.684	7.87483	9.4932	.	7.7853	7.25139	8.31921	.	7.81951	7.11678	8.5222	.	6.52727	6.08294	6.97161	.	6.72332	6.19122	7.25542
	RCP 8.5	2035	Wet	.	9.0053	8.18356	9.8269	.	8.03897	7.50098	8.57696	.	8.13079	7.42805	8.8335	.	6.8787	6.43164	7.32577	.	6.82177	6.28967	7.35388
	RCP 8.5	2036	Wet	.	9.0386	8.20783	9.8693	.	7.92839	7.38664	8.47015	.	8.11929	7.41655	8.822	.	6.76022	6.31307	7.20737	.	6.75582	6.22371	7.28793
	RCP 8.5	2037	Wet	.	9.0436	8.20779	9.8793	.	7.81404	7.2688	8.35928	.	8.22333	7.52058	8.9261	.	6.62686	6.17943	7.07429	.	6.79822	6.26611	7.33033
	RCP 8.5	2038	Wet	.	8.8579	8.02032	9.6955	.	7.69935	7.15088	8.24782	.	7.98205	7.27931	8.6848	.	6.77963	6.33094	7.22832	.	6.62682	6.09471	7.15893
	RCP 8.5	2039	Wet	.	8.8061	7.96833	9.6438	.	7.62819	7.07674	8.17964	.	7.98406	7.28132	8.6868	.	6.58632	6.13756	7.03508	.	6.91159	6.37948	7.4437
	RCP 8.5	2040	Wet	.	8.7407	7.90252	9.5788	.	7.59087	7.03666	8.14509	.	7.83282	7.13007	8.5356	.	6.38511	5.93617	6.83404	.	7.06407	6.53196	7.59618
	RCP 8.5	2041	Wet	.	8.9531	8.11298	9.7932	.	7.73141	7.17463	8.28819	.	8.02322	7.32047	8.726	.	6.50459	6.05513	6.95405	.	7.21028	6.67817	7.74239
	RCP 8.5	2042	Wet	.	9.4431	8.59894	10.2873	.	7.75484	7.19569	8.314	.	7.98474	7.28199	8.6875	.	6.19329	5.74373	6.64284	.	7.16784	6.63573	7.69995
	RCP 8.5	2043	Wet	.	9.8029	8.95313	10.6528	.	7.68243	7.12107	8.24379	.	7.86955	7.16681	8.5723	.	6.30509	5.85543	6.75476	.	6.79342	6.26131	7.32553
	RCP 8.5	2044	Wet	.	10.226	9.36998	11.082	.	7.77877	7.21537	8.34217	.	8.03651	7.33376	8.7393	.	6.93916	6.48929	7.38903	.	6.86633	6.33422	7.39844
	RCP 8.5	2045	Wet	.	10.1547	9.29309	11.0163	.	7.67342	7.10812	8.23872	.	7.72264	7.01989	8.4254	.	6.74305	6.29308	7.19302	.	6.67528	6.14317	7.20738
	RCP 8.5	2046	Wet	.	10.1297	9.26405	10.9954	.	7.87716	7.3101	8.44422	.	8.37366	7.67091	9.0764	.	6.9713	6.52126	7.42133	.	7.09556	6.56345	7.62767
	RCP 8.5	2047	Wet	.	9.8091	8.9412	10.6771	.	7.61618	7.04749	8.18488	.	7.96326	7.26051	8.666	.	6.74841	6.2983	7.19852	.	6.71908	6.18697	7.25119
	RCP 8.5	2048	Wet	.	9.7679	8.89918	10.6367	.	7.9042	7.33399	8.47441	.	8.18746	7.48472	8.8902	.	6.84014	6.38995	7.29033	.	6.81899	6.28688	7.3511
	RCP 8.5	2049	Wet	.	9.428	8.55915	10.2969	.	7.74917	7.17755	8.32079	.	7.95607	7.25332	8.6588	.	6.84337	6.39314	7.2936	.	6.80921	6.2771	7.34132
	RCP 8.5	2050	Wet	.	9.0305	8.16151	9.8996	.	7.71206	7.13913	8.28499	.	8.2138	7.51105	8.9165	.	6.95795	6.50769	7.40821	.	7.07559	6.54348	7.6077
	RCP 8.5	2051	Wet	.	8.7898	7.91992	9.6597	.	7.76976	7.19562	8.34391	.	7.95133	7.24859	8.6541	.	6.77296	6.32264	7.22328	.	7.00513	6.47302	7.53724
	RCP 8.5	2052	Wet	.	8.7902	7.91853	9.662	.	7.75958	7.1843	8.33485	.	7.85658	7.15383	8.5593	.	6.83238	6.38203	7.28273	.	7.04056	6.50845	7.57267
	RCP 8.5	2053	Wet	.	8.734	7.8597	9.6082	.	7.80593	7.22961	8.38226	.	8.05366	7.35091	8.7564	.	7.04911	6.59875	7.49947	.	7.19647	6.66436	7.72858
	RCP 8.5	2054	Wet	.	8.5733	7.69623	9.4504	.	7.65508	7.07778	8.23238	.	7.79164	7.08889	8.4944	.	6.80088	6.35049	7.25128	.	7.08906	6.55695	7.62117
	RCP 8.5	2055	Wet	.	8.7564	7.87678	9.6361	.	7.82775	7.24954	8.40596	.	7.91443	7.21168	8.6172	.	6.94724	6.49682	7.39765	.	7.13986	6.60775	7.67197
	RCP 8.5	2056	Wet	.	8.7728	7.89133	9.6544	.	7.79155	7.2125	8.3706	.	7.82734	7.12459	8.5301	.	7.07	6.61958	7.52042	.	6.97706	6.44495	7.50917
	RCP 8.5	2057	Wet	.	8.9416	8.05904	9.8242	.	7.88593	7.30609	8.46576	.	8.13529	7.43254	8.838	.	6.95856	6.50812	7.409	.	7.04893	6.51682	7.58104
	RCP 8.5	2058	Wet	.	9.1347	8.25169	10.0176	.	7.8543	7.27373	8.43487	.	7.96482	7.26207	8.6676	.	6.86546	6.415	7.31591	.	6.78196	6.24985	7.31407
	RCP 8.5	2059	Wet	.	9.3278	8.44482	10.2108	.	8.04049	7.45925	8.62174	.	8.12999	7.42724	8.8327	.	7.35639	6.90593	7.80685	.	6.7506	6.21849	7.28271
	RCP 8.5	2060	Wet	.	9.2622	8.37909	10.1453	.	7.88863	7.30675	8.47051	.	7.99999	7.29724	8.7027	.	7.10564	6.65517	7.55611	.	6.59326	6.06115	7.12536
	RCP 8.5	2061	Wet	.	9.2733	8.38986	10.1568	.	7.90307	7.32061	8.48554	.	8.24039	7.53764	8.9431	.	7.13363	6.68315	7.5841	.	6.56572	6.03361	7.09783
	RCP 8.5	2062	Wet	.	9.3706	8.48634	10.2549	.	8.02455	7.44154	8.60756	.	8.15258	7.44983	8.8553	.	7.29783	6.84735	7.74832	.	6.51243	5.98032	7.04454
	RCP 8.5	2063	Wet	.	9.2783	8.39283	10.1638	.	8.00004	7.41653	8.58356	.	8.10713	7.40438	8.8099	.	7.00654	6.55605	7.45703	.	6.60257	6.07046	7.13468
	RCP 8.5	2064	Wet	.	8.909	8.0222	9.7958	.	7.90963	7.32564	8.49362	.	8.15917	7.45643	8.8619	.	7.11029	6.6598	7.56078	.	6.61491	6.0828	7.14702
	RCP 8.5	2065	Wet	.	8.6863	7.79837	9.5743	.	7.93103	7.3466	8.51546	.	8.1095	7.40675	8.8122	.	7.0652	6.61471	7.5157	.	6.62733	6.09522	7.15944
	RCP 8.5	2066	Wet	.	8.7162	7.82732	9.605	.	8.04448	7.45964	8.62931	.	8.24965	7.5469	8.9524	.	6.5229	6.0724	6.9734	.	6.74437	6.21226	7.27648
	RCP 8.5	2067	Wet	.	8.6772	7.78785	9.5665	.	8.02057	7.43535	8.60578	.	8.14195	7.4392	8.8447	.	6.77802	6.32752	7.22852	.	6.79748	6.26537	7.32959
	RCP 8.5	2068	Wet	.	8.6654	7.77593	9.555	.	7.99977	7.4142	8.58535	.	8.05621	7.35347	8.759	.	6.82743	6.37693	7.27794	.	6.86565	6.33354	7.39776
	RCP 8.5	2069	Wet	.	8.5931	7.70354	9.4826	.	7.94705	7.36115	8.53295	.	8.08672	7.38397	8.7895	.	6.49962	6.04912	6.95012	.	6.88276	6.35065	7.41487
	RCP 8.5	2070	Wet	.	8.6983	7.80869	9.5878	.	7.96027	7.37406	8.54648	.	8.01938	7.31663	8.7221	.	6.75047	6.29997	7.20098	.	7.02664	6.49453	7.55875
	RCP 8.5	2071	Wet	.	8.8774	7.9877	9.7672	.	7.94848	7.36199	8.53498	.	7.91842	7.21567	8.6212	.	6.54524	6.09473	6.99575	.	7.13808	6.60597	7.67019
	RCP 8.5	2072	Wet	.	8.9628	8.07264	9.8529	.	7.89494	7.30818	8.48171	.	7.9589	7.25616	8.6617	.	6.47796	6.02745	6.92846	.	7.00672	6.47461	7.53883
	RCP 8.5	2073	Wet	.	9.3765	8.48581	10.2672	.	7.85426	7.26725	8.44127	.	7.80123	7.09848	8.504	.	6.65441	6.20391	7.10492	.	6.84759	6.31548	7.3797
	RCP 8.5	2074	Wet	.	9.7436	8.85228	10.6348	.	8.10115	7.51392	8.68839	.	7.96449	7.26174	8.6672	.	6.68124	6.23073	7.13175	.	6.88178	6.34967	7.41389
	RCP 8.5	2075	Wet	.	9.7475	8.85562	10.6393	.	8.04535	7.4579	8.6328	.	8.1688	7.46605	8.8715	.	6.68761	6.2371	7.13811	.	7.04458	6.51247	7.57669
	RCP 8.5	2076	Wet	.	9.5809	8.68863	10.4731	.	7.89783	7.31018	8.48548	.	8.02969	7.32694	8.7324	.	6.6583	6.20779	7.10881	.	6.87175	6.33964	7.40386
	RCP 8.5	2077	Wet	.	9.4984	8.60589	10.3908	.	8.05892	7.47108	8.64675	.	8.10345	7.4007	8.8062	.	6.67719	6.22668	7.1277	.	6.74489	6.21278	7.277
	RCP 8.5	2078	Wet	.	9.4067	8.51419	10.2993	.	7.95855	7.37054	8.54656	.	8.03714	7.33439	8.7399	.	6.63399	6.18348	7.0845	.	6.73544	6.20333	7.26755
	RCP 8.5	2079	Wet	.	9.3456	8.45299	10.2381	.	8.01394	7.42577	8.60212	.	8.05593	7.35318	8.7587	.	6.78145	6.33094	7.23196	.	6.72689	6.19478	7.259
	RCP 8.5	2080	Wet	.	9.4102	8.51762	10.3028	.	8.15855	7.57023	8.74687	.	8.12334	7.42059	8.8261	.	6.91209	6.46158	7.3626	.	6.72366	6.19155	7.25577
	RCP 8.5	2081	Wet	.	9.2732	8.38053	10.1659	.	8.16184	7.57338	8.7503	.	7.99144	7.28869	8.6942	.	7.02295	6.57243	7.47346	.	6.50147	5.96936	7.03358
	RCP 8.5	2082	Wet	.	9.144	8.25114	10.0368	.	8.20936	7.62077	8.79795	.	8.25852	7.55577	8.9613	.	7.11473	6.66422	7.56524	.	6.56506	6.03295	7.09717
	RCP 8.5	2083	Wet	.	8.7837	7.89064	9.6768	.	8.18391	7.5952	8.77262	.	8.21039	7.50764	8.9131	.	7.10563	6.65511	7.55614	.	6.41895	5.88684	6.95106
	RCP 8.5	2084	Wet	.	8.5491	7.65573	9.4425	.	8.26963	7.68081	8.85845	.	8.28559	7.58284	8.9883	.	7.04756	6.59705	7.49807	.	6.48037	5.94826	7.01248
	RCP 8.5	2085	Wet	.	8.2503	7.35666	9.1439	.	8.17003	7.5811	8.75896	.	8.15773	7.45498	8.8605	.	6.94126	6.49075	7.39178	.	6.32949	5.79739	6.8616
	RCP 8.5	2086	Wet	.	8.1443	7.25047	9.0381	.	8.25992	7.6709	8.84895	.	8.35334	7.65059	9.0561	.	7.06575	6.61524	7.51627	.	6.40902	5.87691	6.94113
	RCP 8.5	2087	Wet	.	8.156	7.26202	9.0499	.	8.26261	7.67349	8.85173	.	8.25118	7.54843	8.9539	.	6.75663	6.30612	7.20715	.	6.51692	5.98481	7.04903
	RCP 8.5	2088	Wet	.	8.0495	7.15549	8.9434	.	8.20435	7.61515	8.79355	.	8.12202	7.41927	8.8248	.	6.78535	6.33484	7.23586	.	6.43307	5.90096	6.96518
	RCP 8.5	2089	Wet	.	8.2095	7.31556	9.1035	.	8.14682	7.55754	8.7361	.	8.15175	7.449	8.8545	.	6.87877	6.42825	7.32928	.	6.42474	5.89264	6.95685
	RCP 8.5	2090	Wet	.	8.4316	7.53759	9.3256	.	8.21837	7.62902	8.80773	.	8.14522	7.44247	8.848	.	6.59497	6.14446	7.04548	.	6.39043	5.85832	6.92254
	RCP 8.5	2091	Wet	.	8.7866	7.89255	9.6806	.	8.22833	7.63891	8.81775	.	8.37021	7.66746	9.073	.	6.40311	5.9526	6.85362	.	6.66438	6.13227	7.19649
	RCP 8.5	2092	Wet	.	8.797	7.90287	9.6911	.	8.12938	7.5399	8.71887	.	7.98518	7.28243	8.6879	.	6.61818	6.16767	7.0687	.	6.53288	6.00078	7.06499
	RCP 8.5	2093	Wet	.	8.8896	7.99534	9.7838	.	8.19257	7.60302	8.78211	.	8.14466	7.44192	8.8474	.	6.44509	5.99458	6.8956	.	6.67877	6.14666	7.21088
	RCP 8.5	2094	Wet	.	8.9648	8.07046	9.8592	.	8.07812	7.48852	8.66772	.	8.24291	7.54016	8.9457	.	6.12428	5.67376	6.57479	.	6.69423	6.16212	7.22634
	RCP 8.5	2095	Wet	.	9.3447	8.45022	10.2392	.	8.24381	7.65416	8.83346	.	8.21933	7.51658	8.9221	.	6.30359	5.85308	6.7541	.	6.78082	6.24871	7.31293
	RCP 8.5	2096	Wet	.	9.7011	8.80653	10.5957	.	8.26942	7.67972	8.85911	.	7.97895	7.2762	8.6817	.	6.25481	5.8043	6.70533	.	6.70029	6.16818	7.2324
	RCP 8.5	2097	Wet	.	9.8023	8.90766	10.6969	.	8.25339	7.66365	8.84313	.	8.24278	7.54003	8.9455	.	6.5681	6.11758	7.01861	.	6.83307	6.30096	7.36518
	RCP 8.5	2098	Wet	.	9.7126	8.81794	10.6072	.	8.07439	7.48461	8.66418	.	7.97076	7.26801	8.6735	.	6.5494	6.09889	6.99992	.	6.67499	6.14288	7.2071
	RCP 8.5	2099	Wet	.	9.8171	8.92244	10.7117	.	8.30746	7.71764	8.89728	.	8.12948	7.42673	8.8322	.	6.56818	6.11767	7.01869	.	6.81962	6.28751	7.35173
	RCP 8.5	2100	Wet	.	9.7013	8.80663	10.5959	.	8.13954	7.54968	8.7294	.	7.93933	7.23658	8.6421	.	6.59696	6.14645	7.04747	.	6.68883	6.15672	7.22094
