# Supplementary material for: Long-term historical and projected herbivore population dynamics in Ngorongoro crater, Tanzania
Source: PLoS One. 2020 Mar 10;15(3):e0212530. doi: 10.1371/journal.pone.0212530 (PMC7064247; doi:10.1371/journal.pone.0212530)
Supplement: S6 Table — The results show tests of whether the residuals are correlated and heteroscedastic. The Durbin-Watson test statistics test the null hypothesis that the residuals are uncorrelated. The Jarque-Bera normality test tests the null hypothesis that the residuals are normally distributed. The F statistics and their p-values for ARCH(1) disturbances test the null hypothesis that the residuals have equal covariances. (XLSX) [file pone.0212530.s010.xlsx]

## Sheet: #LN04466
	Species	Season	Durbin-Watson Statistics	Chi-Square	Pr > ChiSq	F Value	Pr > F
	Wildebeest	Wet	2.21872	11.1	0.0039	1.04	0.3133
	Wildebeest	Dry	1.9669	14.02	0.0009	0.43	0.5174
	Zebra	Wet	1.7958	0.69	0.7094	0.05	0.8275
	Zebra	Dry	2.03744	1.7	0.4265	1.02	0.3187
	Thomson's gazelle	Wet	1.90862	1.18	0.5548	0.21	0.6501
	Thomson's gazelle	Dry	2.27656	2.75	0.2522	0.15	0.6987
	Buffalo	Wet	1.88579	16.47	0.0003	0.43	0.5169
	Buffalo	Dry	2.21315	0.98	0.614	2.81	0.1011
	Grant's gazelle	Wet	2.05023	1.4	0.4954	0	0.9915
	Grant's gazelle	Dry	2.13877	0.12	0.9412	0.12	0.7328
