# Supplementary material for: Long-term historical and projected herbivore population dynamics in Ngorongoro crater, Tanzania
Source: PLoS One. 2020 Mar 10;15(3):e0212530. doi: 10.1371/journal.pone.0212530 (PMC7064247; doi:10.1371/journal.pone.0212530)
Supplement: S8 Table — The percentile of rainfall components used to delineate the classes are also provided. (XLSX) [file pone.0212530.s012.xlsx]

## Sheet: #LN00114
	Year	Standardized Annual rainfall	Class	Annual Percentile	Standardized wet season rainfall	Class	Wet season Percentile	Standardized dry season rainfall	Class	Dry season Percentile		Class	Percentile of rainfall component
	1963	.	extreme	10	.	extreme	10	-0.21659	normal	75		Extreme drought	10
	1964	1.05577	Very wet	95	1.18219	Very wet	95	-0.51731	moderate	40		Severe drought	25
	1965	-0.60488	moderate	40	-0.53613	moderate	40	-0.34087	normal	75		Moderate drought	40
	1966	-1.6815	extreme	10	-1.63514	extreme	10	-0.29484	normal	75		Normal year	75
	1967	0.58947	normal	75	-0.26566	normal	75	3.9351	extremely wet	100		Wet	90
	1968	0.58049	normal	75	0.81383	wet	90	-1.02975	extreme	10		very wet	95
	1969	-0.45156	moderate	40	-0.95662	extreme	10	2.28424	extremely wet	100		Extremely wet	100
	1970	0.52894	normal	75	0.70921	wet	90	-0.7904	severe	25
	1971	-0.56564	moderate	40	-0.45068	moderate	40	-0.54953	moderate	40
	1972	-0.38703	moderate	40	-0.64007	moderate	40	1.13816	wet	90
	1973	0.79136	wet	90	0.98439	wet	90	-0.8349	severe	25
	1974	-0.73925	severe	25	-0.91996	severe	25	0.78988	wet	90
	1975	-0.92019	severe	25	-0.83115	severe	25	-0.4498	normal	75
	1976	-0.80178	severe	25	-0.75445	severe	25	-0.25341	normal	75
	1977	0.24623	normal	75	0.27997	normal	75	-0.13681	normal	75
	1978	0.27018	normal	75	0.37719	normal	75	-0.46974	moderate	40
	1979	-0.2051	normal	75	-0.11227	normal	75	-0.42985	normal	75
	1980	-1.51088	extreme	10	-1.57896	extreme	10	0.23601	normal	75
	1981	-0.90755	severe	25	-0.87118	severe	25	-0.20892	normal	75
	1982	-0.24701	moderate	40	-0.72855	severe	25	2.18759	Very wet	95
	1983	2.86044	extremely wet	100	2.7461	extremely wet	100	0.67481	wet	90
	1984	-0.6754	moderate	40	-0.90684	severe	25	1.02462	wet	90
	1985	-0.00787	normal	75	0.18477	normal	75	-0.87479	extreme	10
	1986	-0.04878	normal	75	-0.08233	normal	75	0.1547	normal	75
	1987	-0.18282	normal	75	0.05122	normal	75	-1.07271	extreme	10
	1988	-0.66475	moderate	40	-0.63705	moderate	40	-0.15676	normal	75
	1989	0.93238	wet	90	0.66178	normal	75	1.28698	Very wet	95
	1990	-0.08337	normal	75	0.18242	normal	75	-1.21232	extreme	10
	1991	-0.93349	severe	25	-0.8335	severe	25	-0.50043	moderate	40
	1992	-0.34213	moderate	40	-0.09242	normal	75	-1.15249	extreme	10
	1993	-0.99469	extreme	10	-0.71745	moderate	40	-1.31205	extreme	10
	1994	1.03615	wet	90	0.85555	wet	90	0.88193	wet	90
	1995	-1.45833	extreme	10	-1.29739	extreme	10	-0.80575	severe	25
	1996	-0.11796	normal	75	0.05122	normal	75	-0.77353	severe	25
	1997	1.08371	Very wet	95	1.05839	wet	90	0.17618	normal	75
	1998	2.28804	Very wet	95	2.42114	Very wet	95	-0.48355	moderate	40
	1999	-1.41808	extreme	10	-1.28192	extreme	10	-0.69068	severe	25
	2000	-1.4693	extreme	10	-1.36736	extreme	10	-0.53725	moderate	40
	2001	0.95533	wet	90	1.12736	Very wet	95	-0.73057	severe	25
	2002	0.2135	normal	75	0.24048	normal	75	-0.10766	normal	75
	2003	-0.06478	normal	75	-0.13248	normal	75	0.30966	normal	75
	2004	-0.68936	severe	25	-0.61552	moderate	40	-0.36848	normal	75
	2005	0.31441	normal	75	0.29713	normal	75	0.09946	normal	75
	2006	0.75543	wet	90	0.62209	normal	75	0.6518	wet	90
	2007	2.92929	extremely wet	100	2.79622	extremely wet	100	0.7638	wet	90
	2008	-0.0132	normal	75	-0.27744	normal	75	1.20873	wet	90
	2009	0.16108	normal	75	0.21942	normal	75	-0.25341	normal	75
	2010	0.81497	wet	90	0.98506	wet	90	-0.72903	severe	25
	2011	-0.04812	normal	75	-0.37365	moderate	40	1.48643	Very wet	95
	2012	-0.11597	normal	75	-0.01	normal	75	-0.48509	moderate	40
	2013	0.63869	wet	90	0.77616	wet	90	-0.58942	moderate	40
	2014	-0.69505	severe	25	-0.71711	severe	40	0.06863	normal	75
